## A SHARED GENETIC BASIS FOR PERSONALITY TRAITS AND LOCAL CORTICAL GREY MATTER STRUCTURE?

Sofie L. Valk<sup>1,2\*</sup>; Felix Hoffstaedter<sup>1,2</sup>; Julia A. Camilleri<sup>1,2</sup>; Peter Kochunov<sup>3</sup>; B.T. Thomas Yeo<sup>4,5,6</sup>; Simon B. Eickhoff<sup>1,2</sup>

<sup>1)</sup> *Institute of Neuroscience and Medicine (INM-7: Brain and Behaviour), Research Centre Jülich, 52425 Jülich, Germany*

<sup>2)</sup> *Institute of Systems Neuroscience, Heinrich Heine University Düsseldorf, 40225 Düsseldorf, Germany*

<sup>3)</sup> *Maryland Psychiatric Research Center, University of Maryland School of Medicine, Baltimore, Maryland, USA.*

<sup>4)</sup> *Department of Electrical and Computer Engineering, Clinical Imaging Research Centre, Institute for Health and Memory Networks Program, National University of Singapore, Singapore, Singapore.*

<sup>5)</sup> *Athinoula A. Martinos Center for Biomedical Imaging, Massachusetts General Hospital, Charlestown, MA, USA.*

<sup>6)</sup> *NUS Graduate School for Integrative Sciences and Engineering, National University of Singapore, Singapore, Singapore.*

## **Abstract**

Personality traits are key indices of inter-individual variation. Personality is heritable and has been associated with brain structure and function. To date, it is unknown whether the relation between personality and brain macrostructure can be explained by genetic factors. In a large-scale twin sample (Human Connectome Project), we performed genetic correlation analyses to evaluate whether personality traits (NEO-FFI) and local brain structure have a shared genetic basis. We found a genetic overlap between personality traits and local brain structure in 11 of 22 observed phenotypic associations in predominantly frontal cortices. In these regions the proportion of phenotypic covariance accounted for by shared genetic effects was between 82 and 100%. Second, in the case of Agreeableness, Conscientiousness, and Openness, the phenotypic correlation between personality and local brain structure was observed to reflect genetic, more than environmental, factors. These observations indicate that genetic factors influence the relationship between personality traits and local brain structure. Importantly, observed associations between personality traits and cortical thickness did only partially replicate in two independent large-scale samples of unrelated individuals. Taken together, our findings demonstrate that genes impact the relationship between personality and local brain structure, but that phenotypic associations are, to a large extent, non-generalizable. These observations provide a novel perspective on the nature and nurture of the biological basis of personality.

Personality is “an individual’s characteristic patterns of thought, emotion, and behavior, together with the psychological mechanisms behind those patterns”<sup>1</sup>. Behavioral science ascertains personality structure using a statistical construct that parcellates the individual variability in goals, cognition, and emotion into independent components<sup>2</sup>. A common personality taxonomy is the Big Five Personality inventory<sup>3-5</sup>. The Five-factor personality structure (NEO- Five-Factor-Inventory – NEO-FFI)<sup>6,7</sup> derives five orthogonal dimensions or traits of Agreeableness (friendly/compassionate vs. challenging/detached), Conscientiousness (efficient/organized vs. easy-going/careless), Extraversion (outgoing/ energetic vs. solitary/reserved), Neuroticism (sensitive/nervous vs. secure/confident), and Openness (inventive/curious vs. consistent/cautious). Personality traits have been related to the quality of social relationships<sup>10</sup>, job performance<sup>11</sup>, risk for mental disorders<sup>12,13</sup>, general health and wellbeing, and reproductive success<sup>8,9</sup>.

Personality has both stable and malleable features<sup>14-16</sup> and has been found heritable with approximately 40% of the variance attributable to additive genetic factors<sup>17-22</sup>. Evolutionary causes for variability in personality traits have been suggested to be due to balancing selection, where selection pressures in different directions affect the same traits enabling adaptation to changing environmental demands<sup>16</sup>. Indeed, genome-wide association studies (GWAS) have reported a large number of genetic variants associated with personally traits with each tiny individual effects contributing to the heritability of personality<sup>23-27</sup>.

The biological basis of personality has also been studied in relation to macroscale brain structure and function using magnetic resonance imaging (MRI)<sup>28-31</sup>. While various

studies found some phenotypic relationship between brain structure and personality traits, findings have been inconsistent<sup>28-31</sup>. For instance, researchers failed to observe significant relations between personality and various markers of brain structure using the largest sample to date<sup>32</sup>. At the same time, using a similarly sized sample including monozygotic and dizygotic twins, Owens and colleagues<sup>33</sup> report significant phenotypic relationships between personality traits and various markers of cortical structure. For example, Owens and colleagues observed associations between Agreeableness, Conscientiousness, Neuroticism, and Openness with morphometry in prefrontal areas.

Phenotypic associations between personality and brain structure may be due to shared genetic factors. Specifically, phenotypic correlation between two traits can be driven by pleiotropy where a gene exerts effects on both traits, or affects trait A which in turn affects trait B. On the other hand, phenotypic correlation between brain structure and personality may also be driven by environmental factors including upbringing, stress, or social influences. Genetic correlation analysis can separate between shared additive genetic and environmental factors by using the genetic similarity between individuals (monozygotic twins have ~100% and dizygotic twins and siblings ~50% genetic similarity). To compute the genetic correlation between two traits the phenotypic correlation is decomposed in genetic and environmental sources of covariance using a maximum likelihood approach in combination with the genetic proximity matrix of the sample<sup>34,35</sup>. Additionally, the heritability of both traits is established to compute the relative contribution of genetic and environmental factors to the phenotypic correlation.

In the current study we combined structural neuroimaging of cortical thickness and behavioral genetics to evaluate whether the phenotypic covariance between

personality traits and cortical thickness is associated with shared additive genetic or environmental effects or both. The Human Connectome Project young adult sample is unique in that it provided us with high quality neuroimaging and personality trait (NEO-FFI) data in a large number of twins, siblings, and unrelated individuals. We captured variations in brain morphometry using an atlas-based approach, dividing the cortex in 200 functionally-defined parcels<sup>36,37</sup>. Analysis of heritability and genetic correlation was performed using maximum likelihood variance-decomposition methods using Sequential Oligogenic Linkage Analysis Routines ([www.solar-eclipse-genetics.org](http://www.solar-eclipse-genetics.org); Solar Eclipse 8.4.0.). Heritability ( $h^2$ ) is the total additive genetic variance, and genetic ( $\rho_g$ ) and environmental ( $\rho_e$ ) correlations were estimated using bivariate polygenic analyses. To evaluate the existence of a shared genetic basis of personality traits and brain structure we performed multiple analyses. First, we computed the phenotypic correlation between personality traits and local brain structure in the HCP sample and we assessed to what extent significant phenotypic correlations reflected shared genetic, or environmental, processes. In addition, we performed exploratory whole brain analysis to assess whether regions showed significant genetic, or environmental, correlation independent of the strength of phenotypic correlations. Next, to evaluate whether genetic, above and beyond environmental, processes reflect phenotypic correlations between personality traits and local brain structure, we computed the correlation between the proportion of genetic versus environmental contributions to phenotypic associations on the one hand, and phenotypic associations on the other. Last, to assess whether observed associations between personality and local brain structure in the HCP sample were generalizable and reflect phenotypic associations in independent, unrelated, samples, we selected two large-

scale samples (Genome superstructure project – GSP (n=926) and enhanced Nathan Kline Institute dataset – eNKI (n=792)) of unrelated individuals in which we computed phenotypic correlations between personality traits and cortical thickness. Here, the primary goal was to evaluate whether significant phenotypic associations between personality traits and local cortical thickness observed in the HCP sample could be replicated in samples of unrelated individuals. Additionally, we explored whether genetic or environmental sources of phenotypic covariance computed in the HCP sample would show a positive relationship with phenotypic associations observed in both independent samples at the whole brain level.

## Results

### *Phenotypic correlation between personality traits and cortical thickness*

To assess the relation between personality and macroscale brain structure we first evaluated distribution of behavioral and structural brain measures. Using the Kolmogorov-Smirnov test we found that all personality traits in the HCP sample (n=1106 including 286 MZ-twins and 170 DZ-twins) were conform to normal distributions (KS-score between 0.97 and 1) (Figure 1A). We observed significant phenotypic correlation between all personality traits, with the exception of Openness and Extraversion (Spearman's  $\rho$  ( $\rho_s$ ) = 0.09,  $p < 0.05$ ) and Openness and Neuroticism ( $\rho_s = 0.00$ ) (Figure 1B, Supplementary Table 1). Distribution of cortical thickness values summarized in 200 functionally informed parcels<sup>36</sup> showed highest thickness in anterior insula, and relatively low values in occipital regions (Figure 1B).

Next, we assessed phenotypic correlation between personality traits and cortical thickness parcels. Overall, associations between personality traits and local cortical thickness were weak and ranged between  $\rho_s$  -0.15 and 0.15. We observed significant (FDR, corrected for number of parcels, Supplementary Table 2) correlations between Agreeableness, Neuroticism, and Openness and local cortical thickness. Specifically, Agreeableness related negatively to variations in thickness in left lateral and medial prefrontal cortex (FDR $q < 0.0125$ ). Neuroticism related positively to thickness in dorsolateral frontal areas and left posterior operculum, and negatively to thickness in posterior mid-temporal cortex and occipital regions (FDR $q < 0.015$ ). Openness related negatively to thickness in bilateral ventrolateral cortex, and positively to left inferior temporal regions, right temporal pole, and right cuneus (FDR $q < 0.01$ ) (Supplementary

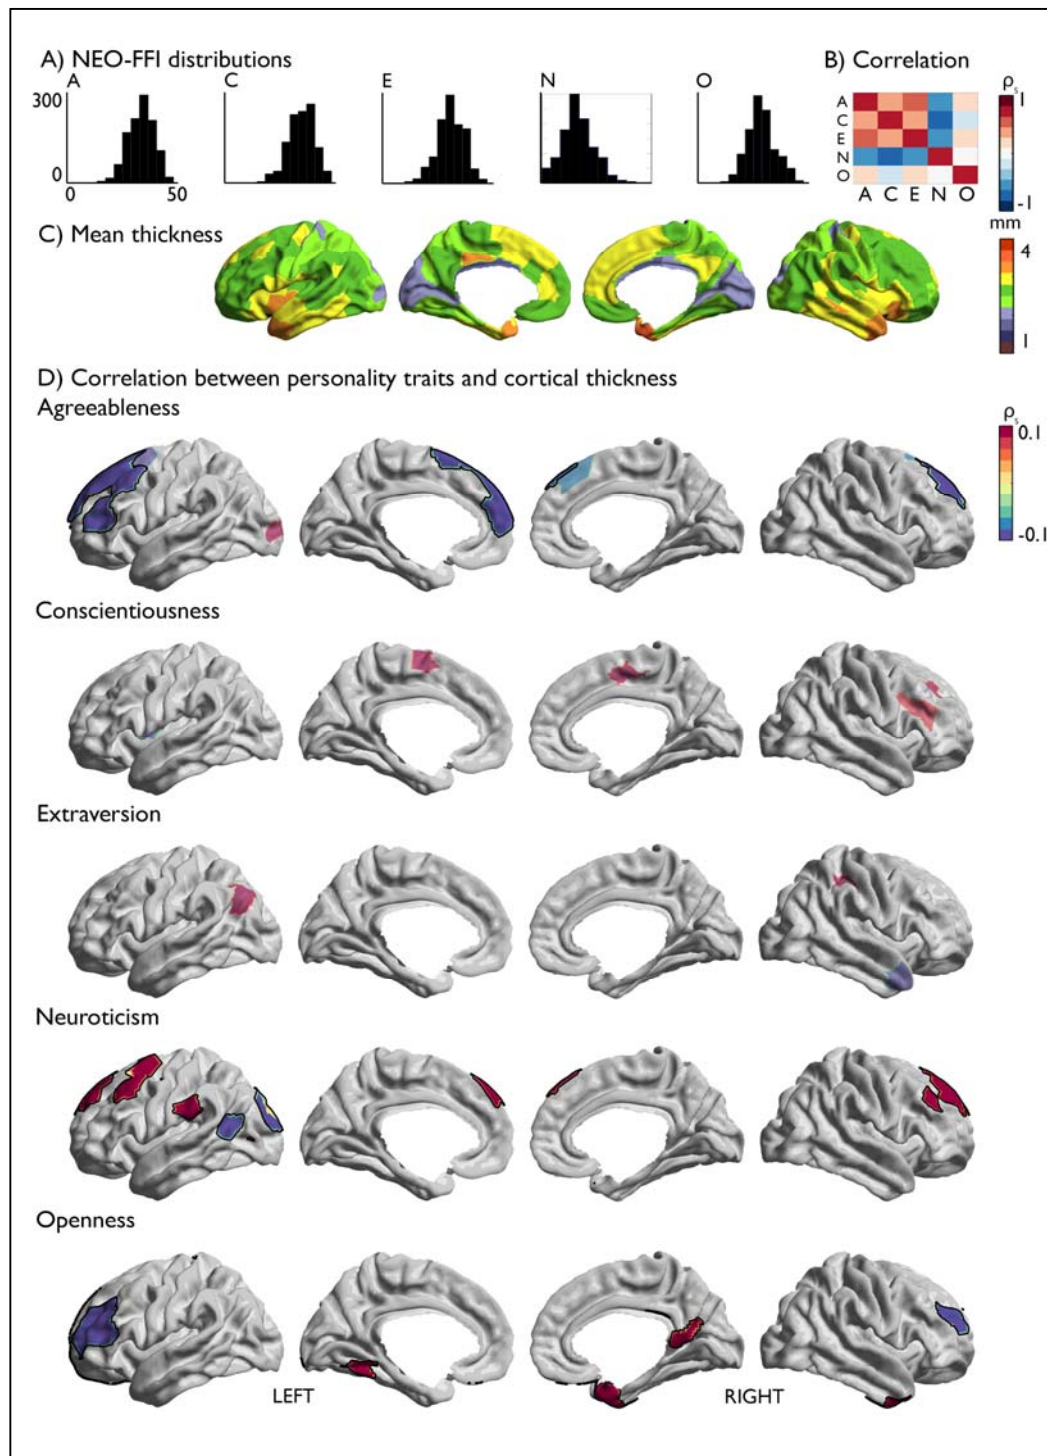

**Figure 1. Significant relation between personality traits and local cortical thickness in the full HCP sample.** Positive  $\rho_s$  between local cortical thickness and each personality trait is displayed in red and negative  $\rho_s$  is displayed in blue. Multiple comparisons were accounted for by using FDR corrections at  $p < 0.05$  correcting for the number of parcels (200), and delineated with black outlines. Uncorrected associations are displayed at  $p < 0.01$ .



Table 2). Agreeableness, Conscientiousness, Neuroticism, and Openness all showed significant correlations with total cognition score (Supplementary Table 3) and associations between personality traits and local brain structure were reduced when controlling for total cognitive score (Supplementary Figure 1). Post-hoc analysis showed that the relation between cortical thickness and personality was partially mediated by intelligence (Supplementary Table 4).

*Genetic influence on the relationship between personality traits and local cortical thickness.*

Subsequently, we sought to evaluate whether the phenotypic correlations observed in the twin-sample were due to shared genetic or environmental effects on grey matter brain structure and personality traits. All personality traits were significantly heritable in our current sample (Figure 2A, Supplementary Table 5), and we confirmed also cortical thickness to be heritable in our parcel-based approach (Figure 2B, Supplementary Table 6). Next, we assessed genetic correlation analyses between personality traits and cortical structure. Please see supplementary tables 7-11 for tables with genetic and environmental correlations between personality traits and all parcels.

First, we investigated the genetic influence on the phenotypic correlation observed between personality traits and cortical thickness. 11 of 22 previously reported significant ( $FDRq < 0.05$ ) phenotypic correlations in the HCP sample showed genetic correlations at  $p < 0.05$ , and in these regions proportional genetic effects accounted for between 82 to 100% of phenotypic variance (Supplementary Table 12). Specifically, associations between Agreeableness and the parcels in left dorsolateral prefrontal cortex

(7Networks\_LH\_Default\_PFC\_11,  $\rho_s = -0.12$ ;  $\rho_g = -0.36$ ,  $p < 0.004$ ;  $\rho_e = 0.01$ ,  $p = \text{ns}$ ,  $\rho_{phg} = -0.13$  (104%),  $\rho_{phe} = 0.005$  (-4%)), left superior frontal cortex (7Networks\_LH\_Default\_PFC\_13,  $\rho_s = -0.11$ ;  $\rho_g = -0.26$ ,  $p < 0.03$ ;  $\rho_e = -0.02$ ,  $p = \text{ns}$ ,  $\rho_{phg} = -0.10$  (87%),  $\rho_{phe} = -0.01$  (13%)) and right superior frontal regions (7Networks\_RH\_Default\_PFCm\_5,  $\rho_s = -0.11$ ;  $\rho_g = -0.33$ ,  $p < 0.005$ ;  $\rho_e = 0.03$ ,  $p = \text{ns}$ ,  $\rho_{phg} = -0.12$  (117%),  $\rho_{phe} = 0.02$  (-17%)) could be attributed to genetic factors. For Neuroticism, genetic factors could be associated with phenotypic relationships in left frontal eye fields (7Networks\_LH\_DorsAttn\_FEF\_2,  $\rho_s = 0.10$ ;  $\rho_g = 0.27$ ,  $p < 0.03$ ;  $\rho_e = -0.03$ ,  $p = \text{ns}$ ,  $\rho_{phg} = 0.10$  (120%),  $\rho_{phe} = -0.02$  (-20%)), right dorsolateral frontal regions (7Networks\_RH\_Cont\_PFC1\_6,  $\rho_s = 0.10$ ;  $\rho_g = 0.26$ ,  $p < 0.04$ ;  $\rho_e = 0.03$ ,  $p = \text{ns}$ ,  $\rho_{phg} = 0.09$  (82%),  $\rho_{phe} = 0.02$  (18%)), and right superior prefrontal regions (7Networks\_RH\_Default\_PFCm\_5,  $\rho_s = 0.12$ ;  $\rho_g = 0.21$ ,  $p < 0.05$ ;  $\rho_e = 0.04$ ,  $p = \text{ns}$ ,  $\rho_{phg} = 0.09$  (79%),  $\rho_{phe} = 0.02$  (21%)). In the case of Openness, genetic factors could be associated with phenotypic correlations with left inferior temporal regions (7Networks\_LH\_Vis\_1,  $\rho_s = 0.10$ ;  $\rho_g = 0.25$ ,  $p < 0.005$ ;  $\rho_e = -0.05$ ,  $p = \text{ns}$ ,  $\rho_{phg} = 0.12$  (125%),  $\rho_{phe} = -0.02$  (-25%)), left lateral frontal cortex (7Networks\_LH\_SalVentAttn\_PFC1\_1,  $\rho_s = -0.11$ ;  $\rho_g = -0.20$ ,  $p < 0.02$ ;  $\rho_e = -0.01$ ,  $p = \text{ns}$ ,  $\rho_{phg} = -0.10$  (94%),  $\rho_{phe} = -0.01$  (6%)), left frontopolar cortex (7Networks\_LH\_Cont\_PFC1\_3,  $\rho_s = -0.12$ ;  $\rho_g = -0.18$ ,  $p < 0.05$ ;  $\rho_e = -0.03$ ,  $p = \text{ns}$ ,  $\rho_{phg} = -0.08$  (87%),  $\rho_{phe} = -0.01$  (13%)), right temporal pole (7Networks\_RH\_Limbic\_TempPole\_1,  $\rho_s = 0.11$ ;  $\rho_g = 0.37$ ,  $p < 0.005$ ;  $\rho_e = -0.01$ ,  $p = \text{ns}$ ,  $\rho_{phg} = 0.12$  (102%),  $\rho_{phe} = -0.00$  (-2%)), and right (pre-)cuneus

(*7Networks\_RH\_Default\_PCC\_1*,  $\rho_s=0.10$ ;  $\rho_g = 0.19$ ,  $p<0.05$ ;  $\rho_e = 0.00$ ,  $p=ns$ ,  $\rho_{phg} = 0.09$  (99%),  $\rho_{phe} = 0.00$  (1%)). 2 of 22 previously reported significant ( $FDRq<0.05$ ) phenotypic correlations in the HCP sample showed environmental correlations at  $p<0.05$ , both in the left dorsolateral frontal cortex, in the case of Agreeableness (*7Networks\_LH\_Cont\_PFC1\_4*,  $\rho_s=-0.12$ ;  $\rho_g = -0.08$ ,  $p=ns$ ;  $\rho_e = -0.12$ ,  $p=0.04$ ,  $\rho_{phg} = -0.02$  (20%),  $\rho_{phe} = -0.09$  (80%)) and for Openness (*7Networks\_LH\_Cont\_PFC1\_4*,  $\rho_s=-0.13$ ;  $\rho_g = -0.15$ ,  $p=ns$ ;  $\rho_e = -0.13$ ,  $p=0.05$ ,  $\rho_{phg} = -0.06$  (46%),  $\rho_{phe} = -0.07$  (54%)).

Next, we performed exploratory whole brain analysis of genetic correlations between personality traits and cortical thickness to evaluate whether we could identify regions that showed significant genetic correlation with personality traits. Agreeableness showed genetic correlation ( $FDRq<0.05$ , corrected for number of parcels) with cortical thickness in left posterior superior/mid temporal sulcus (*7Networks\_LH\_Default\_Temp\_5*,  $\rho_s=0.03$ ;  $\rho_g = 0.60$ ,  $p<0.0005$ ;  $\rho_e = -0.15$ ,  $p<0.01$ ), right superior frontal cortex extending to mid cingulate (*7Networks\_RH\_SalVentAttn\_Med\_3*,  $\rho_s=-0.04$ ;  $\rho_g = -0.55$ ,  $p<0.0004$ ;  $\rho_e = 0.18$ ,  $p<0.005$ ), and right dorsolateral frontal cortex (*7Networks\_RH\_Default\_PFCm\_6*,  $\rho_s=-0.02$ ;  $\rho_g = -0.51$ ,  $p<0.0006$ ;  $\rho_e = 0.21$ ,  $p<0.0004$ ). For proportional distributions of genetic and environmental factors contributing to the total phenotypic correlation in these regions see Supplementary Table 13. Quantitative functional decoding using the BrainMap database<sup>38</sup> (Supplementary Figure 1) indicated that the left posterior superior-mid temporal sulcus was related to various forms of language processing ( $p<0.05$ ), whereas the left superior frontal / mid cingulate parcel was related to action imagination and execution, as well as cognition and perception, and the dorsolateral prefrontal cortex was found implicated in tasks involving memory and reasoning. Second, we observed a

genetic correlation between Extraversion and left TPJ thickness

(7Networks\_LH\_Default\_Temp\_9,

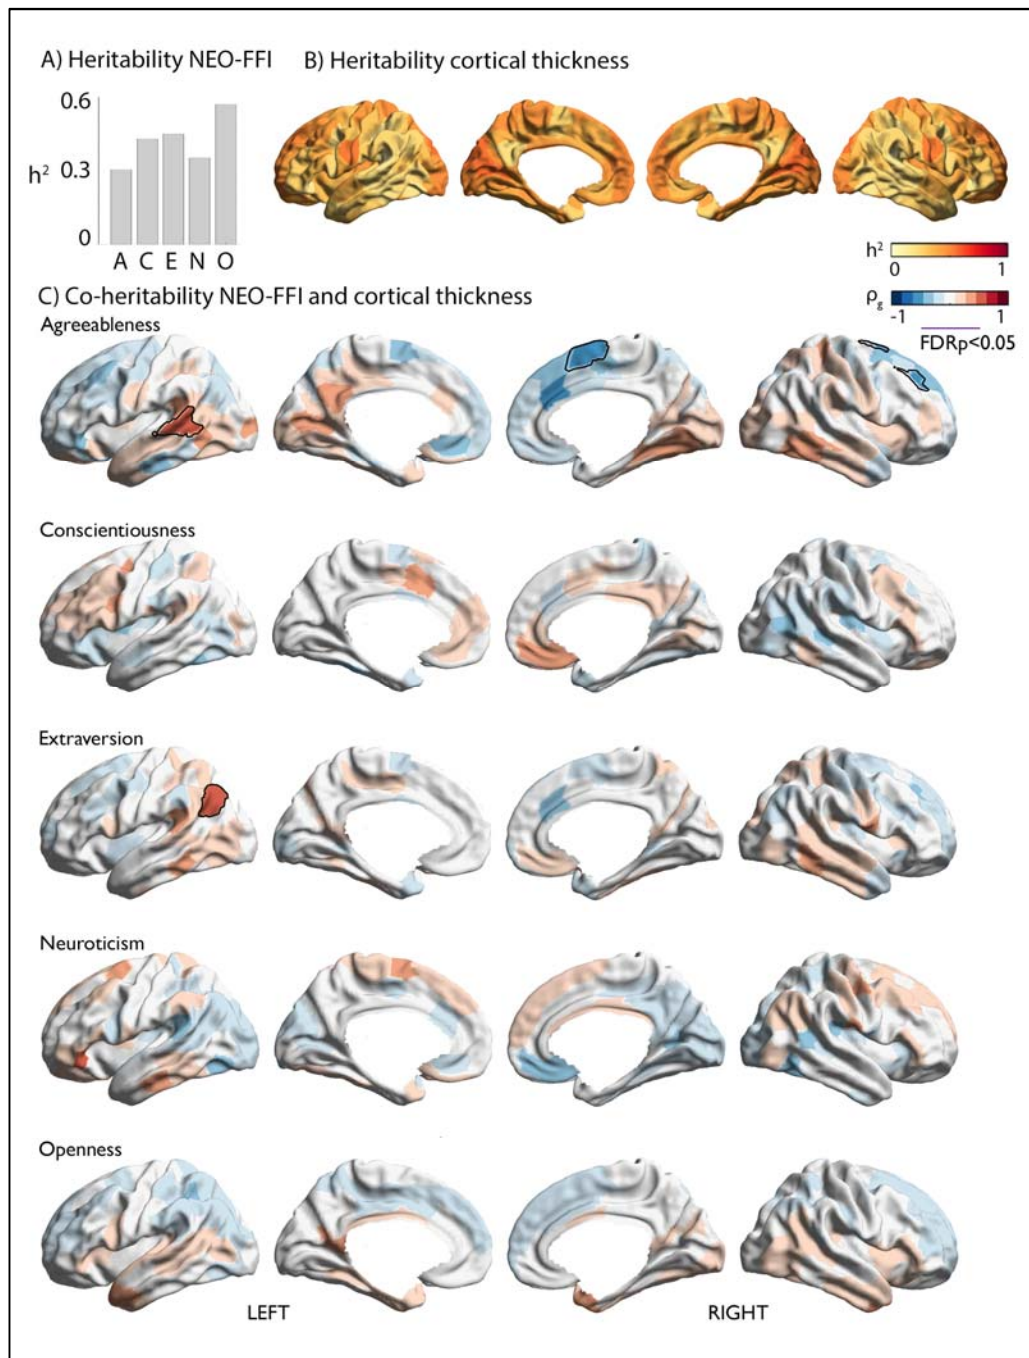

**Figure 2. Genetic correlation between personality traits and cortical thickness.** Upper panel depicts the heritability of A) personality and B) cortical thickness, see Supplementary Table 5 and 6 for exact heritability values. Lower panels are genetic correlation between cortical thickness and personality traits, red values indicate positive associations whereas blue values indicate negative genetic correlation between parcel-

wise thickness and personality traits. Findings at  $FDRq < 0.05$  are outlined in black. Table 7 - 11 for exact genetic correlation values

$\rho_s = 0.1, p < 0.001$ ;  $\rho_g = 0.49, p < 0.00005$ ;  $\rho_e = -0.11, p < 0.05$ ). Functional decoding linked the TPJ with cognitive and social cognitive processing ( $p < 0.05$ ) as well as reasoning and language (Supplementary Figure 2). Lastly, though we observed significant genetic correlation between intelligence (total cognitive score) and Agreeableness, Conscientiousness, Neuroticism, and Openness (Supplementary Table 3), genetic correlations between personality and cortical thickness remained similar when controlling for intelligence (Supplementary Figure 3), though genetic associations between Agreeableness and cortical thickness did not survive FDR corrections. We did not observe significant environmental correlations between cortical thickness and personality traits (Supplementary Figure 4).

*Robustness and replication of associations between personality traits and local cortical thickness.*

As we assessed phenotypic, genetic, and environmental correlations between personality traits and local cortical thickness, we sought to further evaluate the robustness of our observations. First, we evaluated whether the contribution of genetic factors relative to environmental factors positively related to phenotypic correlations in the HCP sample or rather the other way around. We observed significant positive association between the relative contribution of genetic factors with respect to the contribution of environmental factors ( $\rho_{phg}/\rho_{phe}$ ) and the phenotypic correlation for Agreeableness ( $\rho_s = 0.20, p < 0.004$ ), Conscientiousness ( $\rho_s = 0.18, p < 0.01$ ), and Openness ( $\rho_s = 0.31,$

$p < 0.001$ ), and in lesser extent Neuroticism ( $\rho_s = 0.15$ ,  $p < 0.05$ ), but not for Extraversion ( $\rho_s = 0.06$ ,  $p > 0.1$ ) (Supplementary table 15, Supplementary Figure 5). For all personality traits except Openness ( $\rho_{phg}$  vs  $\rho_{ph}$ :  $\rho_s = 0.71$ ,  $p < 0.0001$ ), we observed both significant associations between  $\rho_{phg}$  and phenotypic correlations ( $0.48 < \rho_{phg}$  vs  $\rho_{ph} < 0.60$ ) as well as between  $\rho_{phe}$  and phenotypic correlations ( $0.2 < \rho_{phe}$  vs  $\rho_{ph} < 0.31$ ) (Supplemental Figure 6, Supplementary Table 15).

Next, we evaluated whether the genetic contributions to the phenotypic correlation in our main sample (HCP) could also be associated with phenotypic correlations in independent samples. Our hypothesis was that genetic sources of phenotypic variance might be comparable across different independent samples, even if environmental sources of phenotypic covariance differ between samples. To perform these analyses, we selected two large-scale independent samples of unrelated individuals from the GSP sample ( $n=926$ ), and eNKI sample ( $n=792$ ). We observed few consistent cortical thickness – personality trait relationships across samples in regions that showed significant phenotypic associations with personality in the twin HCP dataset (Supplementary Table 2). In case of Neuroticism we could replicate a positive association with thickness of left frontal eye fields and right dorsolateral prefrontal cortex for GSP ( $p < 0.05$ ) but not eNKI. In case of Openness we could replicate a negative association with bilateral dorsolateral prefrontal cortex in eNKI ( $p < 0.05$ ), but not GSP. (See Supplementary results for whole brain phenotypic associations between personality traits and cortical thickness in the GSP and eNKI samples). Significant genetic correlations (based on Figure 2) were not consistently associated with phenotypic correlations in the GSP and eNKI samples (Supplementary Table 16). However, when evaluating whole

brain patterns of associations between local brain structure and personality traits, we observed that whole brain patterns of phenotypic correlation between Openness, but no other personality trait, and local brain structure correlated with whole brain phenotypic correlational patterns in both GSP ( $\rho_s = 0.43$ ,  $p < 0.001$ ) and eNKI ( $\rho_s = 0.21$ ,  $p < 0.005$ ) samples (Supplementary Table 17 and 18, Supplementary Figure 7). This association was also reflected in genetic (GSP:  $\rho_s = 0.35$ ,  $p < 0.001$ ; eNKI:  $\rho_s = 0.19$ ,  $p < 0.01$ ), but not environmental (GSP:  $\rho_s = 0.08$ ,  $p > 0.2$ ; eNKI:  $\rho_s = -0.08$ ,  $p > 0.2$ ) correlation patterns.



## Discussion

Personality and macroscale brain structure are both heritable, raising the question whether phenotypic relationships between personality and brain structure are driven by shared additive genetic effects or rather by non-genetic processes. In the current study, we used the large scale and openly available HCP dataset which included monozygotic and dizygotic twins to study the genetic correlation between local brain structure and personality traits. First, we identified phenotypic associations between personality traits and local brain structure. Agreeableness had negative associations with local thickness of regions in bilateral frontal cortices, Neuroticism showed positive associations with local thickness of superior frontal cortices and left supramarginal gyrus, and Openness showed negative associations with local thickness of bilateral lateral frontal cortices as well as positive associations with left inferior temporal regions, right temporal pole, and right pre-cuneus. In line with previous studies, personality traits and local cortical thickness were significantly heritable in the current sample. Half (11/22) of the regions that were observed to show significant phenotypic correlations showed genetic correlations at  $p < 0.05$ . The proportional contribution of genetic effects was considerably larger than the contribution of environmental effects (82-100% vs 0-12%) in these areas. In exploratory whole brain analysis of genetic correlations, we additionally identified genetic associations between Agreeableness and local structure of the posterior-mid temporal, midcingulate, and dorsolateral frontal cortices, and between Extraversion temporoparietal junction. Follow-up analyses indicated that at the whole brain level genetic, relative to environmental components, showed a positive relationship with phenotypic correlation patterns for Agreeableness, Conscientiousness, and Openness. Together, these



observations suggest that shared genetic mechanisms contribute to the association between personality traits and local brain structure.

To evaluate whether observed associations between personality traits and local brain structure were generalizable to other samples, we additionally studied phenotypic correlations between personality traits and brain structure in two independent samples of unrelated individuals (GSP and eNKI). Here, we could only partially replicate phenotypic associations between personality and local brain structure in regions that showed significant phenotypic associations in the HCP sample. Only whole brain patterns of phenotypic correlations between Openness and local brain structure were consistently comparable across samples. Interestingly, phenotypic associations between Openness and local thickness in GSP and eNKI showed positive association with genetic, but not environmental, correlations in the HCP sample.

In the current work we assessed the genetic basis of the association between personality and cortical thickness using compressed surface-based MRI data based on the parcellation scheme of Schaefer et al. Using compressed features of structural MRI has been suggested to both improve signal-to-noise of brain measures (cf. Eickhoff et al.<sup>37</sup> and Genon et al.<sup>39</sup>), and optimize analysis scalability. The Schaefer parcellation is derived using functional MRI data from ~1500 subjects and integrates local approaches detecting abrupt transitions in functional connectivity patterns and global approaches that cluster similar functional connectivity patterns<sup>36</sup>. Indeed, a combination of within-area micro circuitry, proxied by brain morphometry, and between-area connectivity enables each area to perform a unique set of computations<sup>40</sup>. Therefore, a parcellation approach

that considers both local and global connectivity might benefit structural image analysis, as it reduces signal-to-noise both within and across individuals and makes control for multiple comparisons more straightforward<sup>39</sup>. Based on the findings in our study, we suggest our approach might be a fruitful first exploratory step to investigate the genetic relation between brain structure and behavior, and locate mechanisms of interest. Future studies can subsequently verify these results by exploring more specific genetic mechanisms, as well as neuroanatomical features.

Though we could establish phenotypic correlations between personality traits and local cortical thickness, associations were weak and phenotypic correlations ranged between Spearman's  $\rho$  -0.15 and 0.15. In the HCP dataset phenotypic correspondences between predominantly frontal regions and personality traits of Agreeableness, Neuroticism, and Openness have been previously reported using a non-parcel-based method by Owens and colleagues<sup>33</sup>. Frontal cortices have been previously reported to be functionally involved in a number of tasks involving higher cognitive functioning, such as executive functioning, metacognition and social cognition<sup>41-46</sup>. We extend previously reported phenotypic observations by showing that these phenotypic relationships between personality and local cortical thickness are driven, in part, by shared additive genetic effects rather than environmental factors alone. The contribution of genetic effects on phenotypic correlations is dependent on the heritability of each of the correlated markers. In our sample, between 30 % and 60 % (on average 42 %) of variance in personality traits was explained by additive genetic factors. This is in line with previous studies using twin and family samples<sup>19</sup> as well as genome-wide approaches<sup>25</sup>. A recent meta-analysis<sup>21</sup>

confirmed that on average 40 % of the variance in personality traits is of genetic origin. Also, conform previous studies<sup>47-51</sup>, we observe high ( $h^2 > 0.4$ ) heritability of cortical thickness, with highest values in primary sensory areas. Heritability patterns follow previously described patterns with relatively strong genetic influence on cortical thickness in unimodal cortices, whereas variance in association cortices is on average less influenced by genetic factors<sup>47-54</sup>.

In addition to establishing the genetic and environmental contribution to phenotypic correlations between personality traits and local brain structure in the HCP sample, we performed exploratory whole-brain analysis of genetic correlation between personality traits and local cortical structure. We observed a significant genetic correlation between Agreeableness, and Extraversion, and local brain structure in functionally meaningful regions. The genetic relationship between Agreeableness and regions involved in higher-order reasoning is in line with theoretical accounts that the ability to reflect on ones actions is essential for being able to be cooperative and prosocial<sup>55</sup>. In case of Extraversion we observed similar functional specificity. Extraversion was genetically associated with thickness of the temporo-parietal junction (TPJ). Regions in the TPJ have repeatedly been associated with both social cognition and language<sup>56-59</sup>. At the same time, these correlations were not consistently mirrored by phenotypic correlations both within sample as well as in two independent samples, questioning the robustness of these local observations. Indeed, regions that showed genetic correlations at FDR-corrected thresholds were outliers, as typical values of genetic correlation ranged between -0.4 and 0.4. Concurrent, we observed that, at whole brain level, the degree of phenotypic

correlation corresponds to relative contribution of genetic, rather than environmental, effects for Agreeableness, Conscientiousness, and Openness. The correspondence between phenotypic and genetic correlations within the HCP sample is in line with Cheverud's conjuncture<sup>60</sup>. This conjuncture asserts the use of phenotypic correlations as proxies for genetic correlations and has been confirmed in other human traits<sup>60</sup>. Observed genetic correlations between cortical thickness and personality traits in the HCP sample might be due to mediated pleiotropy (a gene affects A which affects B). There are various ways in which a genetic process would affect the relationship between personality and grey matter macrostructure. On the one hand, it could be a genetic factor affects grey matter macrostructure and associated function and, as a consequence, personality. On the other hand, it could be that genetic variation affects brain function which in turn modulates both macroscale structure as well as personality, or a genetic mechanism affects an unknown biological factor which in turn affects personality and brain structure. Importantly, recent literature on gene-environment interactions, as well as epigenetics, suggest bidirectional links between neurobiology and environment, via for example methylation and gene expression<sup>61,62</sup>.

We could not robustly replicate phenotypic associations between personality traits and local brain structure observed in HCP in two independent samples. Only the spatial distribution of phenotypic correlations between Openness and local cortical thickness, and associated genetic components, in the HCP sample was robustly related to phenotypic spatial distribution in the two replication samples. Openness had highest heritability in the HCP sample (58%), indicating that the largest proportion of variance in

Openness can be attributed to additive genetic mechanisms. Assuming that genetic correlation patterns of the personality traits observed in the HCP sample are meaningful, there are various explanations for lack of association between genetic correlation and phenotypic correlation out of sample. First, we found that intelligence partially mediated the phenotypic relationship between personality traits and local brain structure in the HCP sample. This observation provides evidence for an interplay between intelligence, personality, and macroscale grey matter structure in the HCP sample. Previous studies have shown a genetic relation between general intelligence and personality<sup>63-65</sup>, as well as to specific traits such as Openness<sup>66</sup> and Extraversion<sup>67</sup>. In the HCP sample the average intelligence is high (total cognitive score: 122), and all personality traits, except Extraversion, show a genetic correlation with intelligence. Intelligence is highly heritable, and has been shown to have a genetic correlation with cortical thickness<sup>68,69</sup>. It is possible associations between personality traits and cortical thickness are enhanced in the HCP sample because of the latter's close relation to intelligence. Indeed, when controlling for intelligence, personality-brain associations were reduced. Notably, the GSP sample has also been reported to of above average intelligence<sup>70</sup>, but also in this sample, we were not able to replicate focal personality – brain associations. In general, though our samples all were from WEIRD (Western, educated, industrialized, rich, and democratic) populations<sup>71</sup>, it might be that personality traits probed are not comparable across samples due to challenges to reliably operationalize personality, and that confounding environmental and noise effects may vary across sample. For example, it has been reported that overall the GSP sample had an abnormal high distribution of negative affect, comparable to clinical populations<sup>70</sup>. Also, the age-range of the eNKI

sample is much broader than the age-range of the HCP and GSP samples. Both cortical thickness and personality traits change across the lifespan<sup>15,54,72,73</sup> and previous work has reported associations between cortical thickness change and personality<sup>74</sup>. Furthermore, as only 40% of personality variance was observed heritable, which indicates that 60% of variance couldn't be attributed to additive genetic effects. Environment, such as family environment, peer-groups, and stress have been reported to influence personality<sup>75,76</sup> and also cortical thickness, and associated behavior, has been reported to change as a consequence of social training in adulthood<sup>77</sup>. Though genetic and gene by environment effects are not to be excluded in this context, is likely such environmental mechanisms further shape the relation between personality traits and brain structure, above and beyond direct additive genetic effects.

Taken together, our observations put forward the hypothesis that both genetic and environmental factors influence shared variance between personality and local structural grey matter anatomy. Future studies on the nature and nurture of personality could benefit from combining cross-sectional with longitudinal set-ups, enabling the analysis of the dynamic relation between brain structure and function, and personality. It is of note that our study on the shared genetic basis of personality and brain structure was made possible by the open HCP, GSP, and eNKI neuroimaging repositories. These initiatives offer cognitive neuroimaging communities an unparalleled access to large datasets for the investigation of the brain basis of individual difference. They have also enabled us to highlight variability across samples and validation experiments to verify stability of our observations. Notably, the use of multiple datasets enabled us to test robustness of

positive findings, and highlighted lack of consistency in local correspondences between personality and brain structure. Given that reproducibility is increasingly important, our study illustrates the advantages of open data to increase understanding of complex traits.

## Materials and methods

### HCP sample:

#### *Participants and study design*

For our analysis we used the publicly available data from the Human Connectome Project S1200 release (HCP; <http://www.humanconnectome.org/>), which comprised data from 1206 individuals (656 females), 298 MZ twins, 188 DZ twins, and 720 singletons, with mean age 28.8 years (SD = 3.7, range = 22–37). We included individuals for whom the scans and data had been released (humanconnectome.org) after passing the HCP quality control and assurance standards<sup>78</sup>. The full set of inclusion and exclusion criteria are described elsewhere<sup>79,80</sup>. In short, the primary participant pool comes from healthy individuals born in Missouri to families that include twins, based on data from the Missouri Department of Health and Senior Services Bureau of Vital Records. Additional recruiting efforts were used to ensure participants broadly reflect ethnic and racial composition of the U.S. population. Healthy is broadly defined, in order to gain a sample generally representative of the population at large. Sibships with individuals having severe neurodevelopmental disorders (e.g., autism), documented neuropsychiatric disorders (e.g. schizophrenia or depression) or neurologic disorders (e.g. Parkinson's disease) are excluded, as well as individuals with diabetes or high blood pressure. Twins born prior 34 weeks of gestation and non-twins born prior 37 weeks of gestation are excluded as well. After removing individuals with missing structural imaging or behavioral data our sample consisted of 1106 individuals (including 286 MZ-twins and 170 DZ-twins) with mean age of 28.8 years (SD =3.7, range =22-37). See further Table 1.



### *Structural imaging processing*

MRI protocols of the HCP are previously described<sup>79,80</sup>. The pipeline used to obtain the Freesurfer-segmentation is described in detail in a previous article<sup>79</sup> and is recommended for the HCP-data. In short, the pre-processing steps included co-registration of T1 and T2 scans, B1 (bias field) correction, and segmentation and surface reconstruction to estimate cortical thickness. The HCP structural pipelines use Freesurfer 5.1 software (<http://surfer.nmr.mgh.harvard.edu/>)<sup>81-84</sup> plus a series of customized steps that combine information from T<sub>1</sub>w as well as T<sub>2</sub>w scans for more accurate white and pial surfaces<sup>79</sup>.

### *Behavioral assessment*

The NEO-FFI personality traits were assessed using the NEO-Five-Factors-Inventory (NEO-FFI)<sup>85</sup>. The NEO-FFI is composed of a subset of 60-items extracted from the full-length 240-item NEO-PI-R. For each item, participants reported their level of agreement on a 5-point Likert scale, from strongly disagree to strongly agree. The NEO instruments have been previously validated in USA and several other countries<sup>86</sup>. See further Table 1.

As a proxy for IQ we used the NIH Toolbox Cognition<sup>87</sup>, ‘total composite score’. The Cognitive Function Composite score is derived by averaging the normalized scores of each of the Fluid and Crystallized cognition measures, then deriving scale scores based on this new distribution. Higher scores indicate higher levels of cognitive functioning. Participant score is normed to those in the entire NIH Toolbox Normative Sample (18 and older), regardless of age or any other variable, where a score of 100 indicates

performance that was at the national average and a score of 115 or 85, indicates performance 1 SD above or below the national average. See further Table 1.

| Measure                               | n       | mean±SD (range)         |
|---------------------------------------|---------|-------------------------|
| <i>Males/Females</i>                  | 506/600 | -                       |
| <i>Age</i>                            | 1106    | 28.8±3.7 (22-36)        |
| <i>Intelligence (Composite score)</i> | 1089    | 121.9±14.6 (84.6-153.4) |
| <i>Agreeableness</i>                  | 1106    | 33.5±5.8                |
| <i>Conscientiousness</i>              | 1106    | 34.5±5.9                |
| <i>Extraversion</i>                   | 1106    | 30.7±6                  |
| <i>Neuroticism</i>                    | 1106    | 16.6±7.4                |
| <i>Openness</i>                       | 1106    | 28.3±6.2                |

**Table 1. Behavioral characteristics of the HCP sample.** Behavioral characteristics for gender, age, intelligence as well as the NEO-FFI scores in the HCP sample.

### GSP sample

#### *Participants and study design*

To evaluate the cross-sample reproducibility of observations we additionally investigated the association between personality and local cortical brain structure in the Brain Genomics Superstruct Project (GSP)<sup>70</sup>. In short, between 2008 and 2012 young adults (ages 18 to 35) with normal or corrected-to-normal vision were recruited from the Boston community to participate in the GSP. The 1,570 individuals included in the release of<sup>70</sup> were selected from a larger databased of individuals who participated in the ongoing GSP data collection initiative. Participants included well-educated individuals with relatively high IQs (many of the college age students are from local colleges with a small fraction coming from Harvard itself). Participants provided written informed consent in accordance with guidelines established by the Partners Health Care Institutional Review Board and the Harvard University Committee on the Use of Human Subjects in Research (See Supplementary Appendix A in<sup>70</sup>).

### *Structural imaging processing*

All imaging data were collected on matched 3T Tim Trio scanners (Siemens Healthcare, Erlangen, Germany) at Harvard University and Massachusetts General Hospital using the vendor-supplied 12-channel phased-array head coil. Structural data included a high-resolution (1.2mm isotropic) multi-echo T1-weighted magnetization-prepared gradient-echo image (multi-echo MPRAGE23, see further: <sup>70</sup>). The low participant burden resulting from the use of multi-echo MPRAGE anatomical scans makes this sequence well suited for high-throughput studies. The morphometric features derived through conventional 6-min 1mm MPRAGE and the 2-min 1.2mm multi-echo MPRAGE are highly consistent ( $r^2 > 0.9$  for most structures) suggesting that rapid acquisition multi-echo MPRAGE can be used for many purposes in place of longer anatomical scans without degradation of the quantitative morphometric estimates. All T1 scans pre-processed using the Freesurfer software library (<http://surfer.nmr.mgh.harvard.edu/>) version 6.0.0 <sup>81-84</sup>. Next, the individual cortical thickness maps were standardized to fsaverage5 for further analysis. Cortical thickness maps were visually inspected (S.L.V.) for inaccuracies.

### *Behavioral markers.*

The NEO-FFI personality traits were assessed using the NEO-Five-Factors-Inventory (NEO-PI-R)<sup>88</sup>, the full-length 240-item NEO-PI-R. For each item, participants reported their level of agreement on a 5-point Likert scale, from strongly disagree to strongly

agree. The NEO instruments have been previously validated in USA and several other countries<sup>86</sup>. As a proxy for IQ we used the estimated IQ derived through the OPIE3 formula<sup>89</sup>. Reported values are in integers and binned. It is of note that distribution of IQ values is positively skewed relative to the general population and that many personality traits, including negative affect and Neuroticism were observed to have distribution that would be expected of a clinically-screened population-based sample<sup>70</sup>. See further Table 2.

| Measure                  | n       | mean±SD (range)    |
|--------------------------|---------|--------------------|
| <i>Males/Females</i>     | 536/390 | -                  |
| <i>Age</i>               | 926     | 21.6±3.9 (19-35)   |
| <i>Estimated IQ</i>      | 892     | 108.7±8.1 (77-129) |
| <i>Agreeableness</i>     | 926     | 32.0±6.6           |
| <i>Conscientiousness</i> | 926     | 31.7±7.2           |
| <i>Extraversion</i>      | 926     | 30.7±6.5           |
| <i>Neuroticism</i>       | 926     | 20.3±8.8           |
| <i>Openness</i>          | 926     | 31.6±6.1           |

**Table 2. Behavioral characteristics of the GSP sample.** Behavioral characteristics for gender, age, intelligence as well as the NEO-FFI scores in the GSP sample.

#### eNKI sample:

##### *Participants and study design*

To evaluate the cross-sample reproducibility of observations we additionally investigated correspondence between personality and cortical brain structure in the enhanced Nathan Kline Institute-Rockland Sample (NKI). The sample was made available by the Nathan-Kline Institute (NKI, NY, USA), as part of the ‘*enhanced NKI-Rockland sample*’ (<https://www.ncbi.nlm.nih.gov/pmc/articles/PMC3472598/>). In short, eNKI was designed to yield a community-ascertained, lifespan sample in which age, ethnicity, and socioeconomic status are representative of Rockland County, New York, U.S.A. ZIP-code based recruitment and enrollments efforts were being used to avoid over-representation of any portion of the community. Participants below 6 years were

excluded to balance data losses with scientific yield, as well as participants above the age of 85, as chronic illness was observed to dramatically increase after this age. All approvals regarding human subjects' studies were sought following NKI procedures. Scans were acquired from the International Neuroimaging Data Sharing Initiative (INDI) online database [http://fcon\\_1000.projects.nitrc.org/indi/enhanced/studies.html](http://fcon_1000.projects.nitrc.org/indi/enhanced/studies.html) For our phenotypic analyses, we selected individuals with complete personality and imaging data. Our sample for phenotypic correlations consisted of 792 (494 females) individuals with mean age of 41.1 years (SD =20.3, range =12-85). Please see Table 3 for demographic characteristics.

#### *Structural imaging processing*

3D magnetization-prepared rapid gradient-echo imaging (3D MP-RAGE) structural scans<sup>90</sup> were acquired using a 3.0T Siemens Trio scanner with TR=2500ms, TE=3.5ms, Bandwidth=190Hz/Px, field of view=256 × 256mm, flip angle=8°, voxel size=1.0 × 1.0 × 1.0mm. More details on image acquisition are available at [http://fcon\\_1000.projects.nitrc.org/indi/enhanced/studies.html](http://fcon_1000.projects.nitrc.org/indi/enhanced/studies.html). All T1 scans were pre-processed using the Freesurfer software library (<http://surfer.nmr.mgh.harvard.edu/>) version 6.0.0<sup>81-84</sup>. Next, the individual cortical thickness maps were standardized to fsaverage5 for further analysis. Cortical thickness segmentations were visually inspected for anatomical errors (S.L.V.).

#### *Behavioral markers.*

The NEO-FFI personality traits were assessed using the NEO-FFI3<sup>85</sup>. The NEO-FFI-3 is a 60-item psychological personality inventory that assesses based on the five-factor model: Openness to Experience, Conscientiousness, Extraversion, Agreeableness, and Neuroticism. Participants are asked to select the response that best represents their opinion on a 5-point scale: 0-Strongly Agree, 1-Agree, 2-Neutral, 3-Disagree, 4-Strongly Disagree. The NEO instruments have been previously validated in USA and several other countries<sup>86</sup>.

For intelligence we used the Wechsler Abbreviated Scale of Intelligence (WASI-II)<sup>91</sup>, full scale IQ. The WASI is a general intelligence, or IQ test designed to assess specific and overall cognitive capabilities and is individually administered to children, adolescents and adults (ages 6-89). It is a battery of four subtests: Vocabulary (31-item), Block Design (13-item), Similarities (24-item) and Matrix Reasoning (30-item). In addition to assessing general, or Full Scale, intelligence, the WASI is also designed to provide estimates of Verbal and Performance intelligence consistent with other Wechsler tests. Specifically, the four subtests comprise the full scale and yield the Full Scale IQ (FSIQ-4), see further Table 3.

| Measure                    | n       | mean±SD (range)     |
|----------------------------|---------|---------------------|
| <i>Males/Females</i>       | 298/494 | -                   |
| <i>Age</i>                 | 792     | 41.1±20.3 (12-85)   |
| <i>Intelligence (WASI)</i> | 792     | 101.9±13.3 (65-141) |
| <i>Agreeableness</i>       | 792     | 34.3±6.0            |
| <i>Conscientiousness</i>   | 792     | 33.9±7.4            |
| <i>Extraversion</i>        | 792     | 30.0±6.4            |
| <i>Neuroticism</i>         | 792     | 18.5±8.1            |
| <i>Openness</i>            | 792     | 31.9±6.3            |

**Table 3. Behavioral characteristics of the eNKI sample.** Behavioral characteristics for gender, age, intelligence as well as the NEO-FFI scores in the eNKI sample.

### *Parcellation approach*

In all three samples, we used a parcellation scheme<sup>36</sup> based on the combination of a local gradient approach and a global similarity approach using a gradient-weighted Markov Random models. The parcellation has been extensively evaluated with regards to stability and convergence with histological mapping and alternative parcellations. In the context of the current study, we focus on the granularity of 200 parcels, as averaging will improve signal-to-noise. 200 parcels are close to granularity used in Enigma (Desikan-atlas, 68 parcels) while at the same time providing more anatomical detail in functionally heterogeneous regions such as parietal and frontal cortex. In order to improve signal-to-noise and improve analysis speed, we opted to average unsmoothed structural data within each parcel. Thus, cortical thickness of each ROI was estimated as the trimmed mean (10 percent trim).

#### *Phenotypic correlation analysis.*

For our phenotypic analysis between local cortical thickness and personality traits we performed Spearman's correlation analysis, controlling for the same variables as in the genetic analysis, namely age, sex, age  $\times$  sex interaction, age<sup>2</sup>, age<sup>2</sup>  $\times$  sex interaction, as well as global thickness effects when investigating brain structure. Results were corrected for multiple comparisons using Benjamin-Hochberg FDR<sup>92</sup> at whole-brain analysis, where we corrected for number of analysis within the current step and report FDR thresholds. When investigating behavior or in post-hoc brain analysis, we corrected for number of analysis  $\times$  ROIs. Post-hoc we also controlled for a proxy for intelligence, total cognitive score<sup>87</sup> or comparable measures in the GSP<sup>89</sup> and eNKI samples<sup>91</sup>.

### *Heritability and genetic correlation analysis*

To investigate the heritability and genetic correlation of brain structure and personality traits, we analyzed 200 parcels of cortical thickness, as well as personality trait score of each subject in a twin-based heritability analysis. As in previous studies<sup>93</sup>, the quantitative genetic analyses were conducted using Sequential Oligogenic Linkage Analysis Routines (SOLAR)<sup>34</sup>. SOLAR uses maximum likelihood variance-decomposition methods to determine the relative importance of familial and environmental influences on a phenotype by modeling the covariance among family members as a function of genetic proximity. This approach can handle pedigrees of arbitrary size and complexity and thus, is optimally efficient with regard to extracting maximal genetic information. To ensure that our traits, behavioral as well as of cortical thickness parcels, conform to the assumptions of normality, an inverse normal transformation was applied for all behavioral and neuroimaging traits<sup>93</sup>.

Heritability ( $h^2$ ) represents the portion of the phenotypic variance ( $\sigma_p^2$ ) accounted for by the total additive genetic variance ( $\sigma_g^2$ ), i.e.,  $h^2 = \sigma_g^2 / \sigma_p^2$ . Phenotypes exhibiting stronger covariances between genetically more similar individuals than between genetically less similar individuals have higher heritability. Heritability analyses were conducted with simultaneous estimation for the effects of potential covariates. For this study, we included covariates including age, sex, age  $\times$  sex interaction, age<sup>2</sup>, age<sup>2</sup>  $\times$  sex interaction. Post-hoc we also controlled for a proxy for intelligence, total cognitive score<sup>87</sup>. When investigating cortical thickness, we additionally controlled for global thickness effects (mean cortical thickness).



To determine if variations in personality and brain structure were influenced by the same genetic factors, genetic correlation analyses were conducted. More formally, bivariate polygenic analyses were performed to estimate genetic ( $\rho_g$ ) and environmental ( $\rho_e$ ) correlations, based on the phenotypic correlation ( $\rho_p$ ), between brain structure and personality with the following formula:  $\rho_p = \rho_g \sqrt{(h^2_1 h^2_2)} + \rho_e \sqrt{[(1 - h^2_1)(1 - h^2_2)]}$ , where  $h^2_1$  and  $h^2_2$  are the heritability's of the parcel-based cortical thickness and the various behavioral traits. The significance of these correlations was tested by comparing the log likelihood for two restricted models (with either  $\rho_g$  or  $\rho_e$  constrained to be equal to 0) against the log likelihood for the model in which these parameters were estimated. A significant genetic correlation (corrected for multiple comparisons using Benjamin-Hochberg FDR <sup>92</sup>) is evidence suggesting that (a proportion of) both phenotypes are influenced by a gene or set of genes <sup>35</sup>.

To compute the contribution of genetic effects relative to the phenotypic correlation, we computed the contribution of the genetic path to the phenotypic correlation ( $\sqrt{h^2_1} \times \rho_g \times \sqrt{h^2_2}$ ) ( $\rho_{phg}$ ) divided by the phenotypic correlation. For the relative contribution of environmental correlation to the phenotypic correlation we computed ( $\sqrt{1-h^2_1} \times \rho_e \times \sqrt{1-h^2_2}$ ) ( $\rho_{phe}$ ) divided by the phenotypic correlation <sup>94</sup>.

### *Functional decoding*

All significant parcels were in a last step functionally characterized using the Behavioral Domain meta-data from the BrainMap database using forward inference (<http://www.brainmap.org> <sup>95,96</sup>). To do so, volumetric counterparts of the surface-based parcels were identified. In particular, we identified those meta-data labels (describing the

computed contrast [behavioral domain]) that were significantly more likely than chance to result in activation of a given parcel<sup>29,38,39</sup>. That is, functions were attributed to the identified neurogenetic effects by quantitatively determining which types of experiments are associated with activation in the respective parcellation region. Significance was established using a binomial test ( $p < 0.05$ , corrected for multiple comparisons using false discovery rate (FDR)).

### *Mediation analysis*

In short, mediation analysis is an important tool in the behavioral sciences for investigating the role of intermediate variables that lie in the path between a treatment and an outcome variable. The influence of the intermediate variable on the outcome is often explored using a linear structural equation model (LSEM), with model coefficients interpreted as possible effects. In the current work, we performed single-level mediation analysis combined with bootstrap-based significant testing using the function ‘mediation.m’ from the Mediation toolbox download from <https://github.com/canlab/MediationToolbox><sup>97,98</sup>. We controlled for effects of global thickness, age and gender, and used ranked variables of personality traits, intelligence and local brain structure.

## Acknowledgements

We would like to thank the various contributors to the open access databases that our data was downloaded from. Specifically; HCP data were provided by the Human Connectome Project, Washington University, the University of Minnesota, and Oxford University Consortium (Principal Investigators: David Van Essen and Kamil Ugurbil;1U54MH091657) funded by the 16 NIH Institutes and Centers that support the NIH Blueprint for Neuroscience Research; and by the McDonnell Center for Systems Neuroscience at Washington University. GSP data were provided by the Brain Genomics Superstruct Project of Harvard University and the Massachusetts General Hospital, (Principal Investigators: Randy Buckner, Joshua Roffman, and Jordan Smoller), with support from the Center for Brain Science Neuroinformatics Research Group, the Athinoula A. Martinos Center for Biomedical Imaging, and the Center for Human Genetic Research. 20 individual investigators at Harvard and MGH generously contributed data to the overall project.

For enhanced NKI, we would like to thank the principal support for the enhanced NKI-RS project is provided by the NIMH BRAINS R01MH094639-01 (PI Milham). Funding for key personnel was also provided in part by the New York State Office of Mental Health and Research Foundation for Mental Hygiene. Funding for the decompression and augmentation of administrative and phenotypic protocols provided by a grant from the Child Mind Institute (1FDN2012-1). Additional personnel support provided by the Center for the Developing Brain at the Child Mind Institute, as well as NIMH R01MH081218, R01MH083246, and R21MH084126. Project support also provided by the NKI Center for Advanced Brain Imaging (CABI), the Brain Research Foundation

(Chicago, IL), and the Stavros Niarchos Foundation. Last, we want to thank L.C.Valk for proofreading the manuscript.

## References

- 1 Funder, D. C. Personality. *Annu Rev Psychol* **52**, 197-221, doi:10.1146/annurev.psych.52.1.197 (2001).
- 2 Mischel, W. Toward an integrative science of the person. *Annu Rev Psychol* **55**, 1-22, doi:10.1146/annurev.psych.55.042902.130709 (2004).
- 3 McCrae, R. R. & Costa, P. T., Jr. Personality trait structure as a human universal. *Am Psychol* **52**, 509-516 (1997).
- 4 John, O. P. & Srivastava, S. in *Handbook of Personality: Theory and Research*. (eds L.A. Pervin & O.P. John) 102-138 (Guilford Press, 1999).
- 5 Saucier, G. & Srivastava, S. in *APA Handbook of Personality and Social Psychology: Vol 4. Personality Processes and Individual Differences*. Vol. 4 (eds M. Mikulincer & P.R. Shaver) (American Psychological Association., 2015).
- 6 McCrae, R. R. & Costa, P. T., Jr. Updating Norman's "Adequate Taxonomy": intelligence and personality dimensions in natural language and in questionnaires. *J Pers Soc Psychol* **49**, 710-721 (1985).
- 7 McCrae, R. R. & Costa, P. T., Jr. Validation of the five-factor model of personality across instruments and observers. *J Pers Soc Psychol* **52**, 81-90 (1987).
- 8 Strickhouser, J. E., Zell, E. & Krizan, Z. Does personality predict health and well-being? A metasynthesis. *Health Psychol* **36**, 797-810 (2017).
- 9 Alvergne, A., Jokela, M. & Lummaa, V. Personality and reproductive success in a high-fertility human population. *Proc Natl Acad Sci U S A* **107**, 11745-11750 (2010).
- 10 Asendorpf, J. B. & Wilpers, S. Personality effects on social relationships. *Journal of Personality and Social Psychology* **74**, 1531-1544 (1998).
- 11 Rothmann, S. & Coetzer, E. P. The big five personality dimensions and job performance. *SA Journal of Industrial Psychology* **29** (2003).
- 12 Miller, J. D., Lynam, D. R., Widiger, T. A. & Leukefeld, C. Personality disorders as extreme variants of common personality dimensions: can the Five-Factor Model adequately represent psychopathy? *J Pers* **69**, 253-276 (2001).
- 13 Trull, T. J. Dimensional models of personality: the five-factor model and the DSM-5. *Dialogues Clin Neurosci* **15**, 135-146 (2013).
- 14 Damian, R. I., Spengler, M., Sutu, A. & Roberts, B. W. Sixteen going on sixty-six: A longitudinal study of personality stability and change across 50 years. *J Pers Soc Psychol* **117**, 674-695, doi:10.1037/pspp0000210 (2019).
- 15 Harris, M. A., Brett, C. E., Johnson, W. & Deary, I. J. Personality stability from age 14 to age 77 years. *Psychol Aging* **31**, 862-874, doi:10.1037/pag0000133 (2016).
- 16 Penke, L. & Jokela, M. The evolutionary genetics of personality revisited. *Current Opinion in Psychology* **7**, 104-109 (2016).
- 17 Bouchard, T. J., Jr. Genes, environment, and personality. *Science* **264**, 1700-1701 (1994).

- 18 Bouchard, T. J., Jr. & McGue, M. Genetic and environmental influences on human psychological differences. *J Neurobiol* **54**, 4-45, doi:10.1002/neu.10160 (2003).
- 19 Jang, K. L., Livesley, W. J. & Vernon, P. A. Heritability of the big five personality dimensions and their facets: a twin study. *J Pers* **64**, 577-591 (1996).
- 20 Loehlin, J. C., McCrae, R. R., Costa, P. T. & John, O. P. Heritabilities of Common and Measure-Specific Components of the Big Five Personality Factors. *Journal of Research in Personality* **32**, 431-453 (1998).
- 21 Vukasovic, T. & Bratko, D. Heritability of personality: A meta-analysis of behavior genetic studies. *Psychol Bull* **141**, 769-785, doi:10.1037/bul0000017 (2015).
- 22 Bouchard, T. J., Jr. & Loehlin, J. C. Genes, evolution, and personality. *Behav Genet* **31**, 243-273 (2001).
- 23 de Moor, M. H. *et al.* Meta-analysis of genome-wide association studies for personality. *Molecular psychiatry* **17**, 337-349, doi:10.1038/mp.2010.128 (2012).
- 24 van den Berg, S. M. *et al.* Meta-analysis of Genome-Wide Association Studies for Extraversion: Findings from the Genetics of Personality Consortium. *Behav Genet* **46**, 170-182, doi:10.1007/s10519-015-9735-5 (2016).
- 25 Lo, M. T. *et al.* Genome-wide analyses for personality traits identify six genomic loci and show correlations with psychiatric disorders. *Nat Genet* **49**, 152-156, doi:10.1038/ng.3736 (2017).
- 26 Verweij, K. J. *et al.* Maintenance of genetic variation in human personality: testing evolutionary models by estimating heritability due to common causal variants and investigating the effect of distant inbreeding. *Evolution* **66**, 3288-3251 (2012).
- 27 Consortium, G. o. P. Meta-analysis of genome-wide association studies for neuroticism, and the polygenic association with major depressive disorder. *JAMA Psychiatry* (2015).
- 28 DeYoung, C. G. *et al.* Testing predictions from personality neuroscience. Brain structure and the big five. *Psychol Sci* **21**, 820-828, doi:10.1177/0956797610370159 (2010).
- 29 Nostro, A. D., Muller, V. I., Reid, A. T. & Eickhoff, S. B. Correlations Between Personality and Brain Structure: A Crucial Role of Gender. *Cereb Cortex* **27**, 3698-3712, doi:10.1093/cercor/bhw191 (2017).
- 30 Riccelli, R., Toschi, N., Nigro, S., Terracciano, A. & Passamonti, L. Surface-based morphometry reveals the neuroanatomical basis of the five-factor model of personality. *Soc Cogn Affect Neurosci* **12**, 671-684, doi:10.1093/scan/nsw175 (2017).
- 31 Bjornebekk, A. *et al.* Neuronal correlates of the five factor model (FFM) of human personality: Multimodal imaging in a large healthy sample. *Neuroimage* **65**, 194-208, doi:10.1016/j.neuroimage.2012.10.009 (2013).
- 32 Avinun, R., Isreal, S., Knodt, A. R. & Hariri, A. R. No evidence for associations between big five personality traits and variability in brain gray or white matter. (BioArXiv June 4th).

- 33 Owens, M. M. *et al.* Cortical morphometry of the five-factor model of  
personality: findings from the Human Connectome Project full sample. *Soc Cogn  
Affect Neurosci* **14**, 381-395, doi:10.1093/scan/nsz017 (2019).
- 34 Almasy, L. & Blangero, J. Multipoint quantitative-trait linkage analysis in general  
pedigrees. *Am J Hum Genet* **62**, 1198-1211, doi:10.1086/301844 (1998).
- 35 Almasy, L., Dyer, T. D. & Blangero, J. Bivariate quantitative trait linkage  
analysis: pleiotropy versus co-incident linkages. *Genet Epidemiol* **14**, 953-958,  
doi:10.1002/(SICI)1098-2272(1997)14:6<953::AID-GEPI65>3.0.CO;2-K (1997).
- 36 Schaefer, A. *et al.* Local-Global Parcellation of the Human Cerebral Cortex from  
Intrinsic Functional Connectivity MRI. *Cereb Cortex* **28**, 3095-3114,  
doi:10.1093/cercor/bhx179 (2018).
- 37 Eickhoff, S. B., Constable, R. T. & Yeo, B. T. T. Topographic organization of the  
cerebral cortex and brain cartography. *Neuroimage* **170**, 332-347,  
doi:10.1016/j.neuroimage.2017.02.018 (2018).
- 38 Fox, P. T., Lancaster, J. L., Laird, A. R. & Eickhoff, S. B. Meta-analysis in  
human neuroimaging: computational modeling of large-scale databases. *Annu Rev  
Neurosci* **37**, 409-434, doi:10.1146/annurev-neuro-062012-170320 (2014).
- 39 Genon, S., Reid, A., Langner, R., Amunts, K. & Eickhoff, S. B. How to  
Characterize the Function of a Brain Region. *Trends Cogn Sci* **22**, 350-364,  
doi:10.1016/j.tics.2018.01.010 (2018).
- 40 Van Essen, D. C. & Glasser, M. F. Parcellating Cerebral Cortex: How Invasive  
Animal Studies Inform Noninvasive Mapmaking in Humans. *Neuron* **99**, 640-  
663, doi:10.1016/j.neuron.2018.07.002 (2018).
- 41 Amodio, D. M. & Frith, C. D. Meeting of minds: the medial frontal cortex and  
social cognition. *Nat Rev Neurosci* **7**, 268-277, doi:10.1038/nrn1884 (2006).
- 42 Baird, B., Smallwood, J., Gorgolewski, K. J. & Margulies, D. S. Medial and  
lateral networks in anterior prefrontal cortex support metacognitive ability for  
memory and perception. *J Neurosci* **33**, 16657-16665,  
doi:10.1523/JNEUROSCI.0786-13.2013 (2013).
- 43 Bludau, S. *et al.* Cytoarchitecture, probability maps and functions of the human  
frontal pole. *Neuroimage* **93 Pt 2**, 260-275,  
doi:10.1016/j.neuroimage.2013.05.052 (2014).
- 44 Buckner, R. L., Andrews-Hanna, J. R. & Schacter, D. L. The brain's default  
network: anatomy, function, and relevance to disease. *Ann N Y Acad Sci* **1124**, 1-  
38, doi:10.1196/annals.1440.011 (2008).
- 45 Fleming, S. M. & Dolan, R. J. The neural basis of metacognitive ability. *Philos  
Trans R Soc Lond B Biol Sci* **367**, 1338-1349, doi:10.1098/rstb.2011.0417 (2012).
- 46 Valk, S. L., Bernhardt, B. C., Bockler, A., Kanske, P. & Singer, T. Substrates of  
metacognition on perception and metacognition on higher-order cognition relate  
to different subsystems of the mentalizing network. *Hum Brain Mapp* **37**, 3388-  
3399, doi:10.1002/hbm.23247 (2016).
- 47 Kremen, W. S. *et al.* Genetic and environmental influences on the size of specific  
brain regions in midlife: the VETSA MRI study. *Neuroimage* **49**, 1213-1223,  
doi:10.1016/j.neuroimage.2009.09.043 (2010).



- 48 Strike, L. T. *et al.* Genetic Complexity of Cortical Structure: Differences in Genetic and Environmental Factors Influencing Cortical Surface Area and Thickness. *Cereb Cortex*, doi:10.1093/cercor/bhy002 (2018).
- 49 Eyler, L. T. *et al.* A comparison of heritability maps of cortical surface area and thickness and the influence of adjustment for whole brain measures: a magnetic resonance imaging twin study. *Twin Res Hum Genet* **15**, 304-314, doi:10.1017/thg.2012.3 (2012).
- 50 Panizzon, M. S. *et al.* Distinct genetic influences on cortical surface area and cortical thickness. *Cereb Cortex* **19**, 2728-2735, doi:10.1093/cercor/bhp026 (2009).
- 51 Winkler, A. M. *et al.* Cortical thickness or grey matter volume? The importance of selecting the phenotype for imaging genetics studies. *Neuroimage* **53**, 1135-1146, doi:10.1016/j.neuroimage.2009.12.028 (2010).
- 52 Teeuw, J. *et al.* Genetic Influences on the Development of Cerebral Cortical Thickness During Childhood and Adolescence in a Dutch Longitudinal Twin Sample: The Brainscale Study. *Cereb Cortex*, doi:10.1093/cercor/bhy005 (2018).
- 53 Hofer, E. & al., e. Genetic Determinants of Cortical Structure (Thickness, Surface Area and Volumes) among Disease Free Adults in the CHARGE Consortium. *bioRxiv preprint first posted online Sep. 9, 2018*; doi: <http://dx.doi.org/10.1101/409649>. (2018).
- 54 Fjell, A. M. *et al.* Development and aging of cortical thickness correspond to genetic organization patterns. *Proc Natl Acad Sci U S A* **112**, 15462-15467, doi:10.1073/pnas.1508831112 (2015).
- 55 Frith, C. D. The role of metacognition in human social interactions. *Philos Trans R Soc Lond B Biol Sci* **367**, 2213-2223, doi:10.1098/rstb.2012.0123 (2012).
- 56 Bzdok, D. *et al.* Left inferior parietal lobe engagement in social cognition and language. *Neurosci Biobehav Rev* **68**, 319-334, doi:10.1016/j.neubiorev.2016.02.024 (2016).
- 57 Mar, R. A. The neural bases of social cognition and story comprehension. *Annu Rev Psychol* **62**, 103-134, doi:10.1146/annurev-psych-120709-145406 (2011).
- 58 Kanske, P., Bockler, A., Trautwein, F. M. & Singer, T. Dissecting the social brain: Introducing the EmpaToM to reveal distinct neural networks and brain-behavior relations for empathy and Theory of Mind. *Neuroimage* **122**, 6-19, doi:10.1016/j.neuroimage.2015.07.082 (2015).
- 59 Valk, S. L. *et al.* Socio-Cognitive Phenotypes Differentially Modulate Large-Scale Structural Covariance Networks. *Cereb Cortex*, doi:10.1093/cercor/bhv319 (2016).
- 60 Sodini, S. M., Kemper, K. E., Wray, N. R. & Trzaskowski, M. Comparison of Genotypic and Phenotypic Correlations: Cheverud's Conjecture in Humans. *Genetics* **209**, 941-948, doi:10.1534/genetics.117.300630 (2018).
- 61 Kong, A. *et al.* The nature of nurture: Effects of parental genotypes. *Science* **359**, 424-428, doi:10.1126/science.aan6877 (2018).
- 62 Trerotola, M., Relli, V., Simeone, P. & Alberti, S. Epigenetic inheritance and the missing heritability. *Hum Genomics* **9**, 17, doi:10.1186/s40246-015-0041-3 (2015).



- 63 Dunkel, C. S., Cabeza de Baca, T., Woodley, M. A. & Fernandes, H. B. F. The  
general factor of personality and general intelligence: Testing hypothesis from  
differential-K, life history theory, and strategic differentiation-integration effort. .  
*Personality and Individual Differences* **61-62**, 13-17 (2014).
- 64 Dunkel, C. S., van der Linden, D., Beaver, K. M. & Woodley, M. A. Using a  
prison sample to assess the association between the general intelligence factor of  
personality and general intelligence. *Intelligence* **47** (2014).
- 65 Kretzschmar, A., Spengler, M., Schubert, A. L., Steinmayr, R. & Ziegler, M. The  
Relation of Personality and Intelligence-What Can the Brunswik Symmetry  
Principle Tell Us? *J Intell* **6**, doi:10.3390/jintelligence6030030 (2018).
- 66 Bartels, M. *et al.* The five factor model of personality and intelligence: A twin  
study of the relationship between the two constructs. *Personality and Individual  
Differences* **53**, 368-373 (2012).
- 67 Bratko, D., Butkovic, A., Vukasovic, T., Chamorro-Premuzic, T. & von Stumm,  
S. Cognitive ability, self-assessed intelligence, and personality: Common genetic  
but independent environmental aetiologies. *Intelligence* **40** (2012).
- 68 Schmitt, J. E. *et al.* The Dynamic Associations Between Cortical Thickness and  
General Intelligence are Genetically Mediated. *Cereb Cortex*,  
doi:10.1093/cercor/bhz007 (2019).
- 69 Ge, T. *et al.* The Shared Genetic Basis of Educational Attainment and Cerebral  
Cortical Morphology. *Cereb Cortex*, doi:10.1093/cercor/bhy216 (2018).
- 70 Holmes, A. J. *et al.* Brain Genomics Superstruct Project initial data release with  
structural, functional, and behavioral measures. *Sci Data* **2**, 150031,  
doi:10.1038/sdata.2015.31 (2015).
- 71 Laajaj, R. *et al.* Challenges to capture the big five personality traits in non-  
WEIRD populations. *Science Advances* **5** (2019).
- 72 Shaw, P. *et al.* Neurodevelopmental trajectories of the human cerebral cortex. *J  
Neurosci* **28**, 3586-3594, doi:10.1523/JNEUROSCI.5309-07.2008 (2008).
- 73 Wierenga, L. M., Langen, M., Oranje, B. & Durston, S. Unique developmental  
trajectories of cortical thickness and surface area. *Neuroimage* **87**, 120-126,  
doi:10.1016/j.neuroimage.2013.11.010 (2014).
- 74 Ferschmann, L. *et al.* Personality Traits Are Associated With Cortical  
Development Across Adolescence: A Longitudinal Structural MRI Study. *Child  
Dev* **89**, 811-822, doi:10.1111/cdev.13016 (2018).
- 75 Hopwood, C. J. *et al.* Genetic and environmental influences on personality trait  
stability and growth during the transition to adulthood: a three-wave longitudinal  
study. *J Pers Soc Psychol* **100**, 545-556, doi:10.1037/a0022409 (2011).
- 76 Nakao, K. *et al.* The influences of family environment on personality traits.  
*Psychiatry Clin Neurosci* **54**, 91-95, doi:10.1046/j.1440-1819.2000.00642.x  
(2000).
- 77 Valk, S. L. *et al.* Structural plasticity of the social brain: Differential change after  
socio-affective and cognitive mental training. *Sci Adv* **3**, e1700489,  
doi:10.1126/sciadv.1700489 (2017).
- 78 Marcus, D. S. *et al.* Human Connectome Project informatics: quality control,  
database services, and data visualization. *Neuroimage* **80**, 202-219,  
doi:10.1016/j.neuroimage.2013.05.077 (2013).

- 79 Glasser, M. F. *et al.* The minimal preprocessing pipelines for the Human Connectome Project. *Neuroimage* **80**, 105-124, doi:10.1016/j.neuroimage.2013.04.127 (2013).
- 80 Van Essen, D. C. *et al.* The WU-Minn Human Connectome Project: an overview. *Neuroimage* **80**, 62-79, doi:10.1016/j.neuroimage.2013.05.041 (2013).
- 81 Fischl, B. FreeSurfer. *NeuroImage* **62**, 774-781 (2013).
- 82 Fischl, B. & Dale, A. M. Measuring the thickness of the human cerebral cortex from magnetic resonance images. *Proc Natl Acad Sci U S A* **97**, 11050-11055, doi:10.1073/pnas.200033797 (2000).
- 83 Fischl, B., Sereno, M. I. & Dale, A. M. Cortical surface-based analysis. II: Inflation, flattening, and a surface-based coordinate system. *Neuroimage* **9**, 195-207, doi:10.1006/nimg.1998.0396 (1999).
- 84 Dale, A. M., Fischl, B. & Sereno, M. I. Cortical surface-based analysis. I. Segmentation and surface reconstruction. *Neuroimage* **9**, 179-194, doi:10.1006/nimg.1998.0395 (1999).
- 85 McCrae, R. R. & Costa, P. T. A contemplated revision of the NEO Five-Factor Inventory. *Pers Individ Dif*. **36**, 587-596 (2004).
- 86 McCrae, R. R. & Terracciano, A. Personality profiles of cultures: aggregate personality traits. *J Pers Soc Psychol* **89**, 407-425, doi:10.1037/0022-3514.89.3.407 (2005).
- 87 Weintraub, S. *et al.* Cognition assessment using the NIH Toolbox. *Neurology* **80**, S54-64, doi:10.1212/WNL.0b013e3182872ded (2013).
- 88 Costa, P. T. & McCrae, R. R. *NEO PI-R Professional Manual*. (Psychological Assessment Resources, Inc., 1992).
- 89 Schoenberg, M. R., Scott, J. G., Duff, K. & Adams, R. L. Estimation of WAIS-III intelligence from combined performance and demographic variables: development of the OPIE-3. *Clin Neuropsychol* **16**, 426-437, doi:10.1076/clin.16.4.426.13913 (2002).
- 90 Mugler, J. P., 3rd & Brookeman, J. R. Three-dimensional magnetization-prepared rapid gradient-echo imaging (3D MP RAGE). *Magn Reson Med* **15**, 152-157 (1990).
- 91 Wechsler, D. *Wechsler Abbreviated Scale of Intelligence.*, (The Psychological Corporation., 1999).
- 92 Benjamini, Y. & Hochberg, Y. Controlling the False Discovery Rate: A Practical and Powerful Approach to Multiple Testing. *Journal of the Royal Statistical Society. Series B (Methodological)* **57**, 289-300 (1995).
- 93 Glahn, D. C. *et al.* Genetic control over the resting brain. *Proc Natl Acad Sci U S A* **107**, 1223-1228, doi:10.1073/pnas.0909969107 (2010).
- 94 Zheng, D., Chen, J., Wang, X. & Zhou, Y. Genetic contribution to the phenotypic correlation between trait impulsivity and resting-state functional connectivity of the amygdala and its subregions. *Neuroimage* **201**, 115997, doi:10.1016/j.neuroimage.2019.07.010 (2019).
- 95 Laird, A. R. *et al.* The BrainMap strategy for standardization, sharing, and meta-analysis of neuroimaging data. *BMC Res Notes* **4**, 349, doi:10.1186/1756-0500-4-349 (2011).

- 96 Laird, A. R. *et al.* ALE Meta-Analysis Workflows Via the Brainmap Database: Progress Towards A Probabilistic Functional Brain Atlas. *Front Neuroinform* **3**, 23, doi:10.3389/neuro.11.023.2009 (2009).
- 97 Wager, T. D. *et al.* Brain mediators of cardiovascular responses to social threat: part I: Reciprocal dorsal and ventral sub-regions of the medial prefrontal cortex and heart-rate reactivity. *Neuroimage* **47**, 821-835, doi:10.1016/j.neuroimage.2009.05.043 (2009).
- 98 Wager, T. D., Davidson, M. L., Hughes, B. L., Lindquist, M. A. & Ochsner, K. N. Prefrontal-subcortical pathways mediating successful emotion regulation. *Neuron* **59**, 1037-1050, doi:10.1016/j.neuron.2008.09.006 (2008).



## Supplementary results

### *Phenotypic correlation between personality traits and local brain structure in two large-scale samples of unrelated individuals.*

To assess whether the phenotypic correlation between personality and cortical thickness is replicable across samples we selected unrelated individuals from the GSP sample (n=926) and eNKI sample (n=792). We correlated each personality trait with cortical thickness at each parcel, which we corrected for multiple comparisons using  $FDRq < 0.05$  (controlling for the number of parcels). Though distributions of cortical thickness and personality traits were comparable across samples (Supplementary Figure 8), we did not find significant relationships between personality traits and parcel-wise cortical thickness in any of the samples (Supplementary Figure 9). Also, trend-level ( $p < 0.01$ ) relationships between personality traits and cortical thickness showed little overlap across samples (Supplementary Figure 9).

### *Phenotypic and genetic correlation between personality traits.*

We also evaluated whether the phenotypic correlations observed between personality traits in HCP could reflect shared genetic or environmental processes (Supplementary Table 19 and 20). We observed significant genetic correlation between Extraversion and Agreeableness ( $\rho_g = 0.38$ ) and Extraversion and Conscientiousness ( $\rho_g = 0.33$ ). Significant environmental correlations were observed between Agreeableness and Conscientiousness ( $\rho_e = 0.32$ ), Agreeableness and Extraversion ( $\rho_e = 0.26$ ), Agreeableness and Neuroticism ( $\rho_e = -0.41$ ), Conscientiousness and Extraversion ( $\rho_e =$

0.24), Conscientiousness and Neuroticism ( $\rho_e = -0.51$ ), and Extraversion and Neuroticism ( $\rho_e = -0.39$ ).

*Replication analysis in significant phenotypic correlations when controlling for IQ*

To evaluate whether replication would be possible when controlling for IQ, we reran phenotypic analysis in GSP and eNKI while controlling for IQ in the model and evaluated phenotypic correlations within the  $FDR_{q < 0.05}$  ROIs derived from the HCP sample (when controlling for IQ). None of the ROIs showed a relationship ( $p < 0.05$ ) with the respective personality trait (Supplementary table 21).

## Supplementary Figures

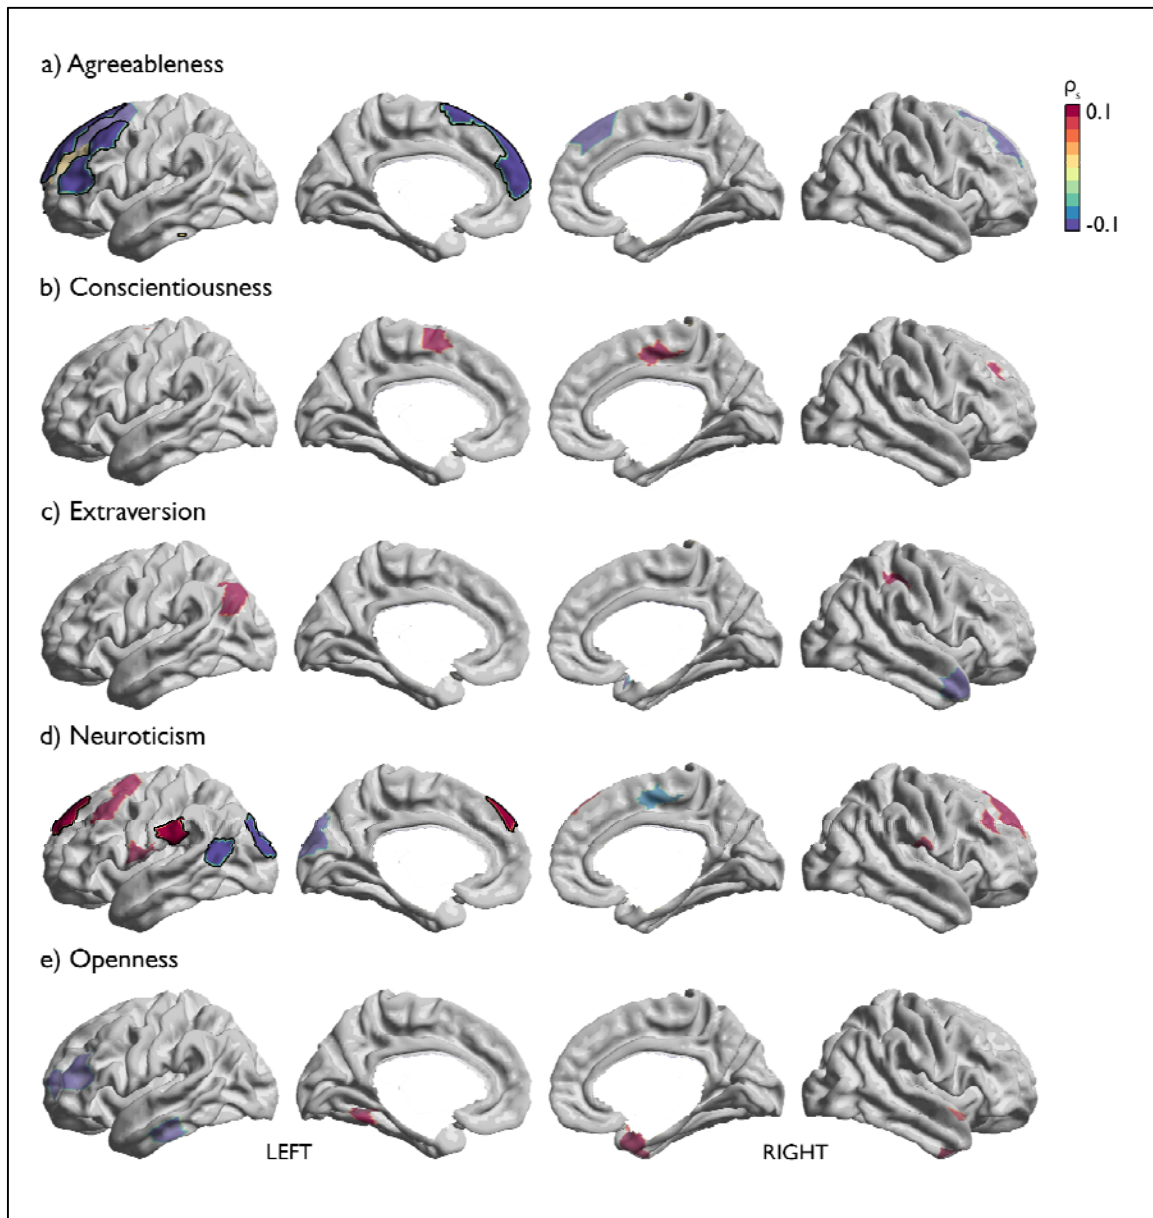

**Supplementary Fig 1. Significant relation between personality traits and local cortical thickness in the full HCP sample correcting for IQ.** IQ is based on the ‘total cognitive score’ of the HCP. Positive  $\rho_s$  between local cortical thickness and personality trait is displayed in red and negative  $\rho_s$  is displayed in blue. Multiple comparisons were accounted for by using FDR corrections at  $p < 0.05$  correcting for the number of parcels (200), and delineated with black outlines. Trend-level associations are displayed at  $p < 0.01$

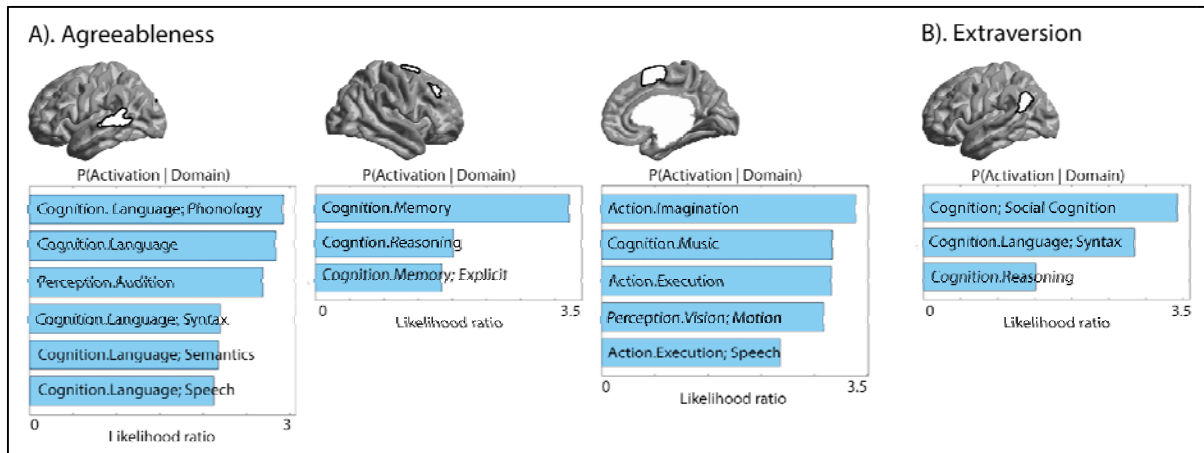

**Supplementary Fig 2. Genetic correlates between cortical thickness and personality traits functionally relate to (socio-) cognitive and language processing.** Quantitative functional decomposition of neurogenetic markers of personality traits based on the FDR-corrected clusters of genetic relationships of Figure 2.



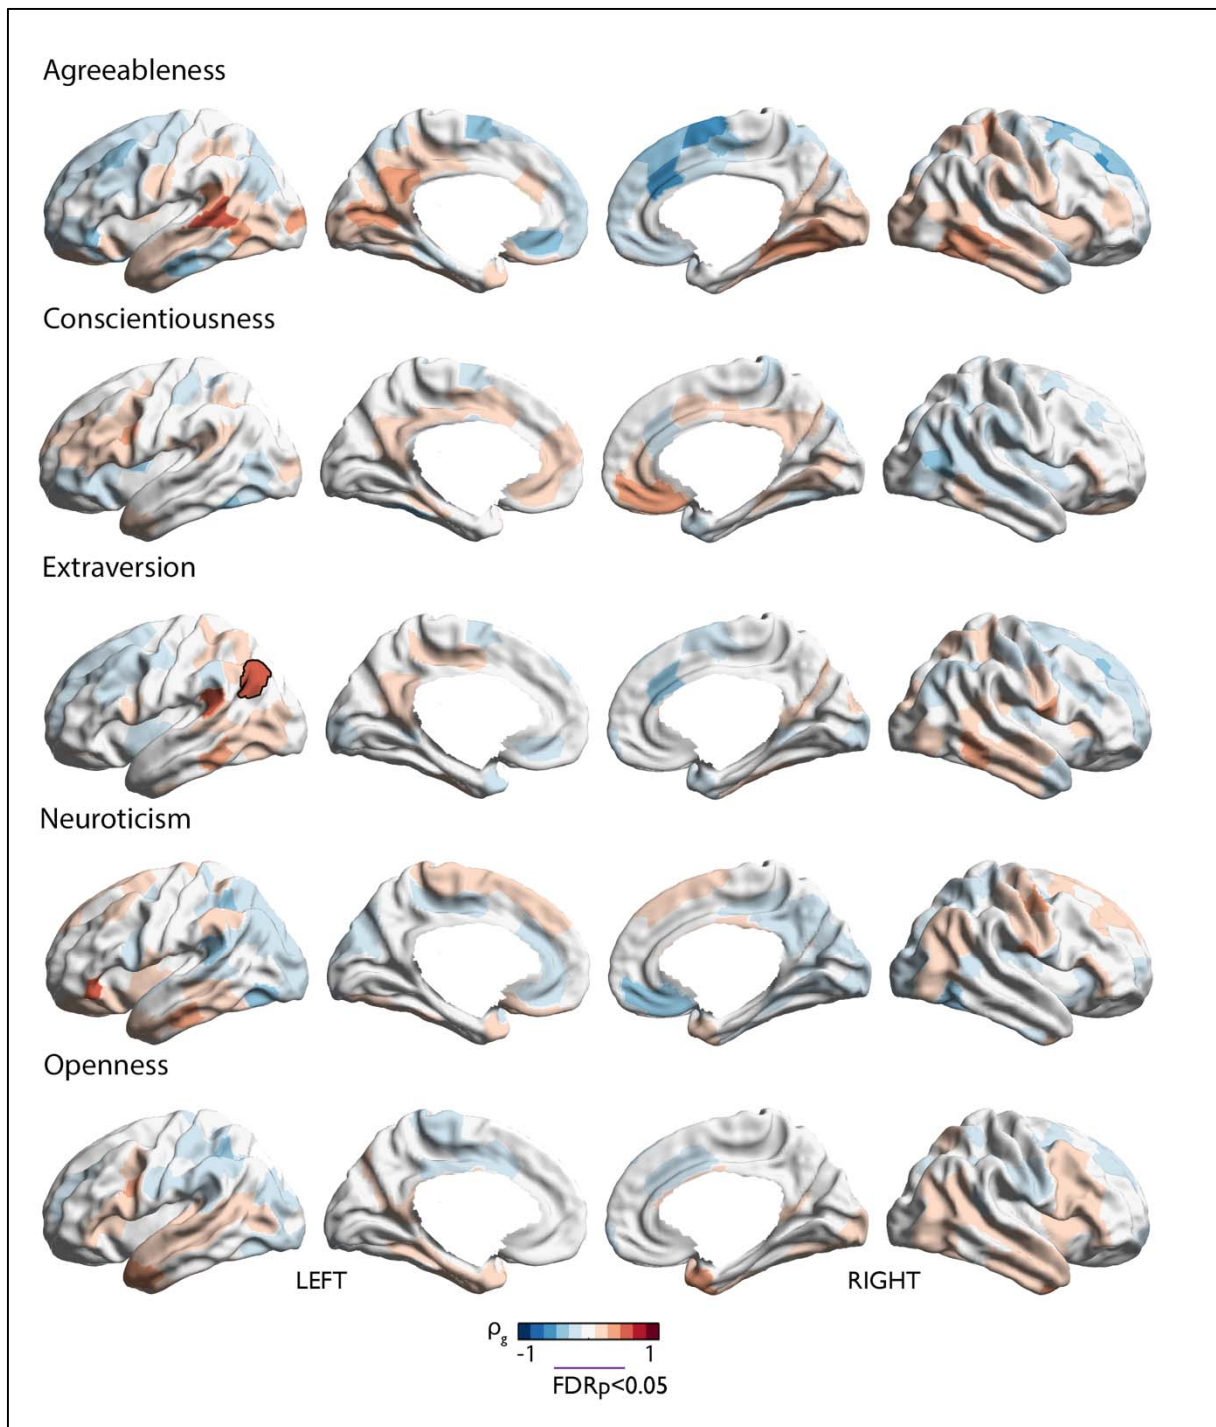

**Supplementary Fig 3. Genetic correlations between personality traits and cortical thickness controlled for total cognitive score.** Red values indicate positive genetic correlation whereas blue values indicate negative genetic correlation between parcel-wise cortical thickness and personality traits. Findings at FDR $q$ <0.05 are outlined in black.

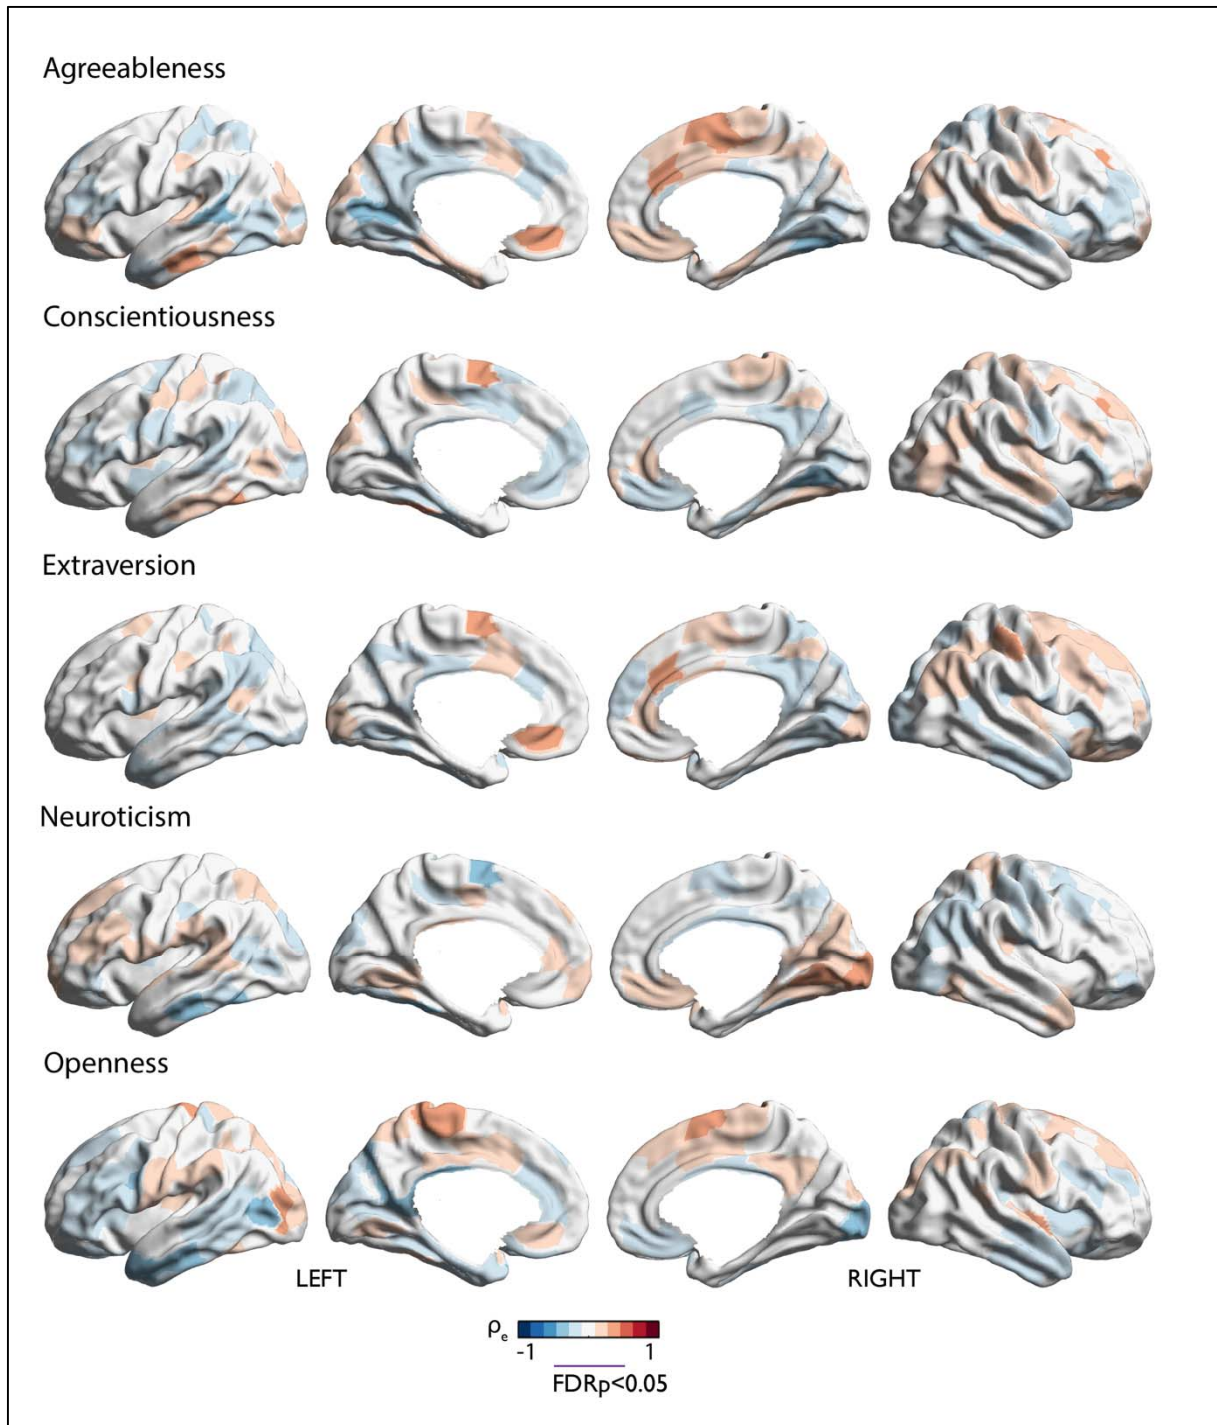

**Supplementary Fig 4. Environmental correlations between personality traits and cortical thickness.** Red values indicate positive environmental correlation whereas blue values indicate negative environmental correlation between parcel-wise thickness and personality traits. Findings at  $FDRq < 0.05$  are outlined in black.

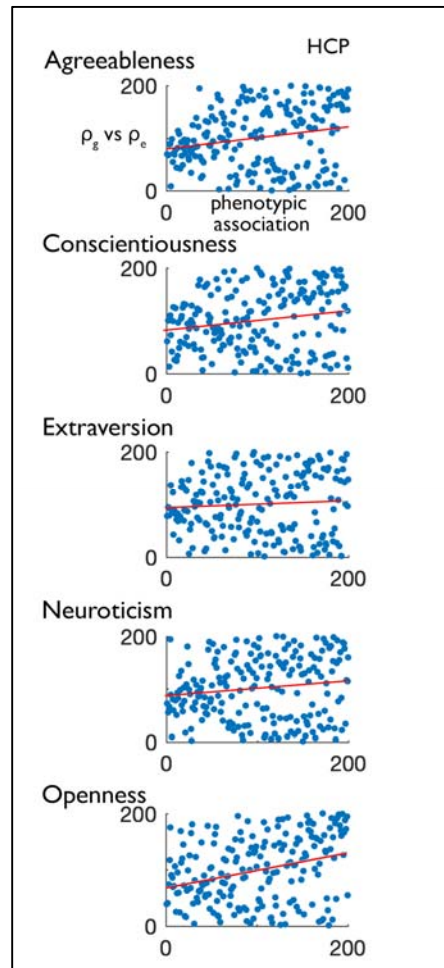

**Supplementary Fig 5. Correlation between cortex-wide spatial distributions of phenotypic correlation and ( $\rho_{phg}/\rho_{phe}$ ) in HCP.** Scatterplots of the correlation between the ranked phenotypic correlation between personality traits and cortical thickness (X-axis) and ranked contribution of  $\rho_{phg}$  (genetic contribution to phenotypic correlation) relative to  $\rho_{phe}$  (environmental contribution to phenotypic correlation) (Y-axis).

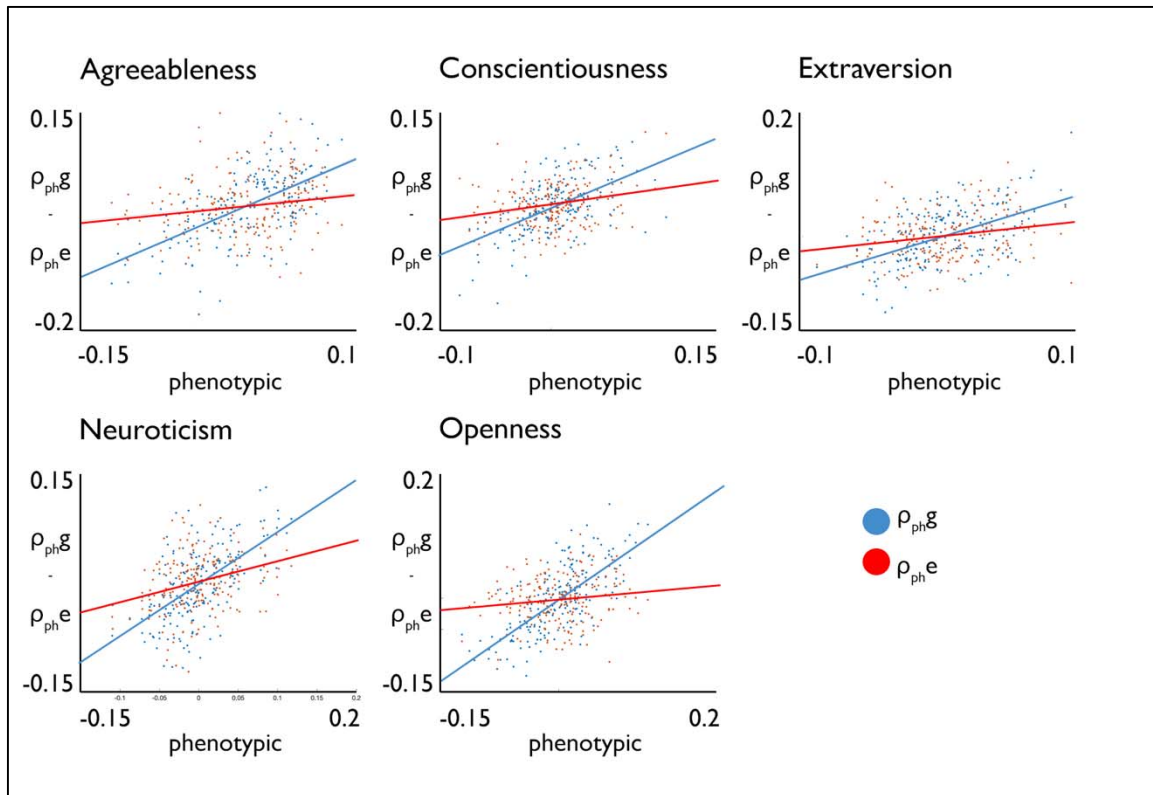

**Supplementary Fig 6. Correlation between cortex-wide spatial distributions of phenotypic correlation and  $\rho_{phg}$  versus phenotypic correlation and  $\rho_{phe}$  in HCP.** Scatterplots of the correlation between the phenotypic correlation between personality traits and cortical thickness (X-axis) and  $\rho_{phg}$  (genetic contribution to phenotypic correlation) in blue (Y-axis) as well as between phenotypic correlation between personality traits and cortical thickness (X-axis) and  $\rho_{phe}$  (environmental contribution to phenotypic correlation) to the phenotypic correlation between personality traits and cortical thickness (in red) (Y-axis).



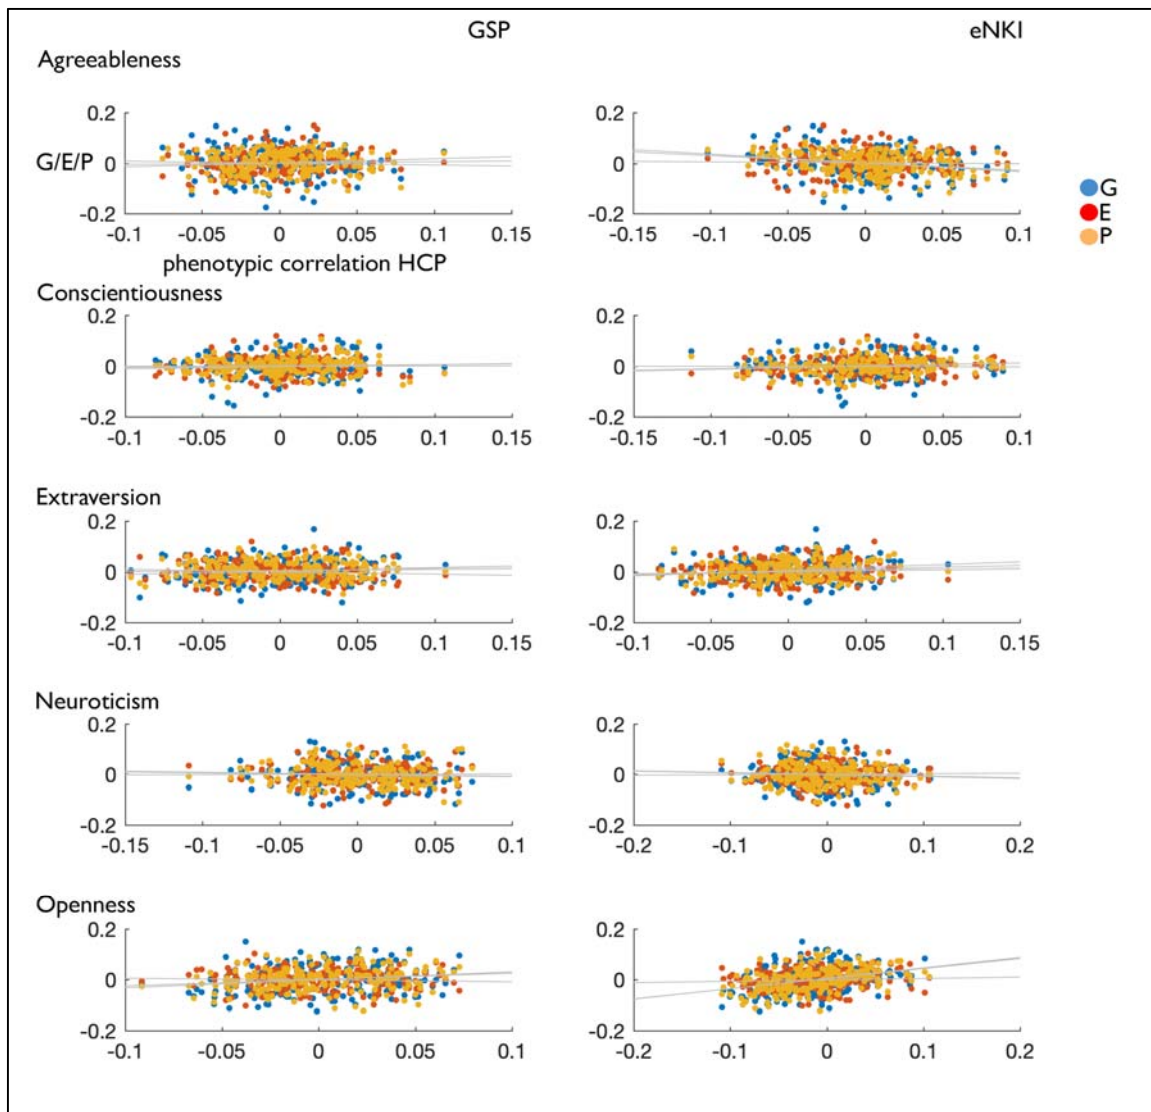

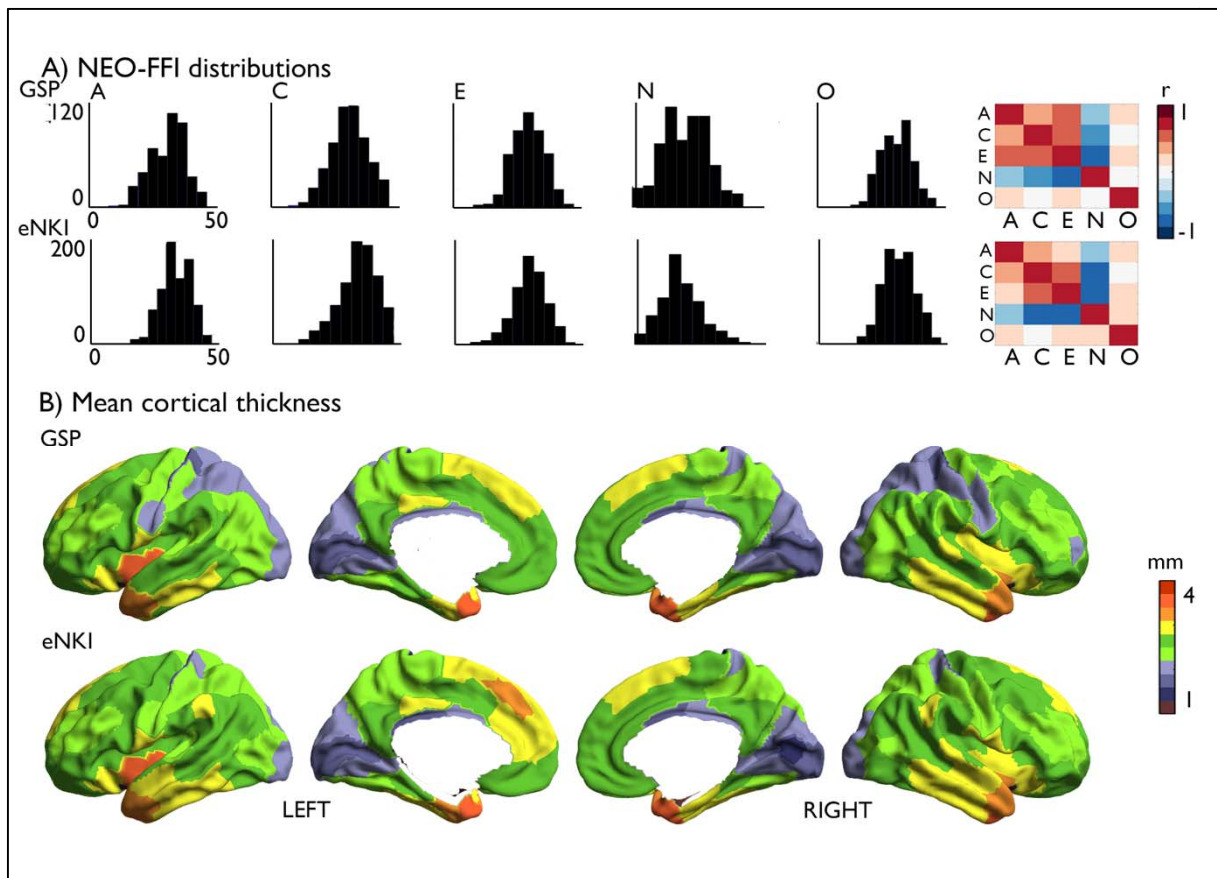

**Supplementary Fig 8. Distribution of NEO-FFI scores, their intercorrelation, and parcel-wise cortical thickness in two unrelated samples.** A). Distributions of NEO-FFI scores in two unrelated samples (GSP; eNKI). B). Intercorrelation of personality trait scores in each sample. C). Distribution of mean parcel-wise thickness in mm in the two unrelated samples.

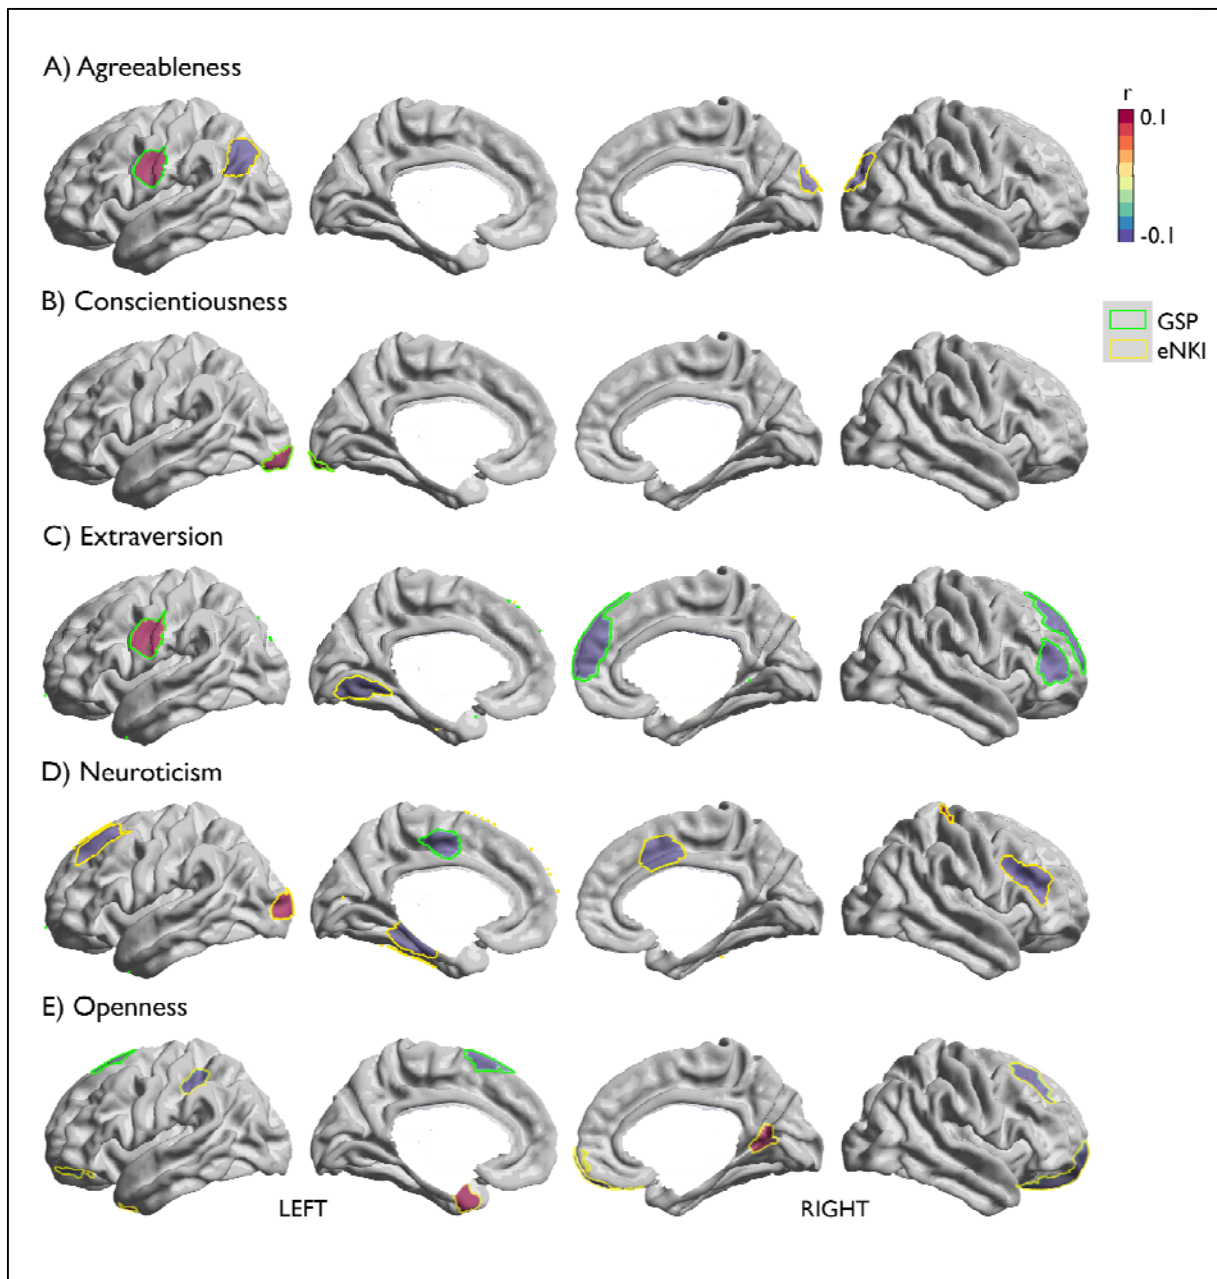

**Supplementary Fig 9. Phenotypic relationship between cortical thickness and personality in two unrelated sample.** Findings in each sample are displayed at  $p < 0.01$ , positive Spearman's  $\rho$  is displayed in red, whereas negative Spearman's  $\rho$  is displayed in blue. Findings are outlined with specific color per sample (green=GSP, yellow= eNKI). Multiple comparisons were accounted for by using  $FDRp < 0.05$  correcting for the number of parcels (200).

## Supplementary Tables

| Personality trait        | A        | C        | E        | N    | O |
|--------------------------|----------|----------|----------|------|---|
| <i>Agreeableness</i>     | 1        |          |          |      |   |
| <i>Conscientiousness</i> | 0.22 **  |          |          |      |   |
| <i>Extraversion</i>      | 0.29 **  | 0.26 **  |          |      |   |
| <i>Neuroticism</i>       | -0.33 ** | -0.42 ** | -0.35 ** |      |   |
| <i>Openness</i>          | 0.11 **  | -0.10 ** | 0.09 *   | 0.00 |   |

**Supplementary Table 1. Phenotypic correlation of personality traits in HCP.** Phenotypic correlation across personality traits. A=Agreeableness, C=Conscientiousness, E=Extraversion, N=Neuroticism, O=Openness. \*\* indicates corrected at FDR<sub>q</sub><0.05, controlled for number of analysis (10), \* indicates p<0.05.

| Agreeableness                      | HCP      | GSP    | eNKI  |
|------------------------------------|----------|--------|-------|
| <i>7Networks_LH_Cont_PFCl_4</i>    | -0.11 ** | 0.04   | -0.02 |
| <i>7Networks_LH_Default_PFC_7</i>  | -0.11 ** | 0.02   | 0.01  |
| <i>7Networks_LH_Default_PFC_9</i>  | -0.12 ** | -0.01  | 0.05  |
| <i>7Networks_LH_Default_PFC_11</i> | -0.12 ** | -0.01  | -0.03 |
| <i>7Networks_LH_Default_PFC_12</i> | -0.10 ** | 0.08 * | 0.01  |
| <i>7Networks_LH_Default_PFC_13</i> | -0.11 ** | -0.02  | -0.01 |
| <i>7Networks_RH_Default_PFCm_5</i> | -0.11 ** | -0.06  | 0.04  |

| Neuroticism                               | HCP      | GSP    | eNKI  |
|-------------------------------------------|----------|--------|-------|
| <i>7Networks_LH_Vis_14</i>                | -0.11 ** | 0.07 * | -0.01 |
| <i>7Networks_LH_DorsAttn_FEF_2</i>        | 0.10 **  | 0.07 * | 0.00  |
| <i>7Networks_LH_SalVentAttn_ParOper_2</i> | 0.10 **  | -0.03  | 0.01  |
| <i>7Networks_LH_Default_Temp_6</i>        | -0.11 ** | 0.06   | -0.01 |
| <i>7Networks_LH_Default_PFC_9</i>         | 0.11 **  | 0.03   | -0.02 |
| <i>7Networks_LH_Default_PFC_11</i>        | 0.10 **  | 0.00   | -0.05 |
| <i>7Networks_RH_Cont_PFCl_6</i>           | 0.10 **  | 0.07 * | -0.03 |
| <i>7Networks_RH_Default_PFCm_5</i>        | 0.12 **  | -0.01  | -0.04 |

| Openness                               | HCP      | GSP   | eNKI    |
|----------------------------------------|----------|-------|---------|
| <i>7Networks_LH_Vis_1</i>              | 0.10 **  | 0.05  | -0.01   |
| <i>7Networks_LH_SalVentAttn_PFCl_1</i> | -0.11 ** | 0.02  | -0.06   |
| <i>7Networks_LH_Cont_PFCl_3</i>        | -0.11 ** | 0.01  | -0.07 * |
| <i>7Networks_LH_Cont_PFCl_4</i>        | -0.12 ** | 0.02  | -0.01   |
| <i>7Networks_RH_Limbic_TempPole_1</i>  | 0.11 **  | 0.02  | 0.00    |
| <i>7Networks_RH_Cont_PFCl_5</i>        | -0.10 ** | 0.05  | -0.09 * |
| <i>7Networks_RH_Default_PCC_1</i>      | 0.10 **  | -0.03 | -0.00   |

**Supplementary Table 2. Phenotypic correlations in parcels with FDR-corrected association between personality traits and local brain structure in HCP and independent samples (GSP and eNKI).** Robustness of phenotypic association (Spearman's  $\rho$ ) between parcels that showed significant (FDR<sub>q</sub><0.05) phenotypic correlation in the HCP sample and the corresponding personality trait. \*\* indicates FDR<sub>q</sub><0.05 (corrected for number of ROIs per personality trait), whereas \* indicates p<0.05. ROIs all showed significant associations with personality traits in the whole brain analysis of the HCP sample. Nevertheless, all relationships are marked as \*\* for clarity. Nomenclature of the regions is based on the official parcel names of the Schaefer 200 – 7 networks parcel solution.



| <b>Intelligence (h2r=0.75)</b> | <b>Spearman's <math>\rho</math></b> | <b><math>\rho_g</math></b> | <b><math>\rho_e</math></b> | <b>GSP</b> | <b>eNKI</b> |
|--------------------------------|-------------------------------------|----------------------------|----------------------------|------------|-------------|
| <i>Agreeableness</i>           | 0.10 **                             | 0.31(0.09) **              | -0.09(0.07)                | 0.04       | 0.02        |
| <i>Conscientiousness</i>       | -0.11 **                            | -0.26(0.07) **             | 0.11(0.07)                 | -0.01      | -0.09*      |
| <i>Extraversion</i>            | -0.03                               | -0.06(0.07)                | 0.01(0.07)                 | -0.08*     | -0.10**     |
| <i>Neuroticism</i>             | -0.11 **                            | -0.22(0.08) **             | 0.01(0.07)                 | -0.08*     | -0.02       |
| <i>Openness</i>                | 0.24 **                             | 0.37(0.06) **              | -0.002(0.07)               | 0.12**     | 0.28**      |

**Supplementary Table 3. Phenotypic and genetic correlation between personality traits and intelligence.** Phenotypic correlation, genetic correlation (and standard error) and environmental correlation (and standard error) between intelligence (total cognitive score) and personality traits in HCP, as well as phenotypic correlation between personality traits and intelligence in GSP and eNKI samples. \*\* indicates a Spearman's  $\rho$ -value  $FDRq < 0.05$  (controlled for number of analysis), whereas \* indicates  $p < 0.05$ .

|                                    | <b>X &gt; M</b> | <b>M &gt; Y</b> | <b>X &gt; Y<br/>unmediated</b> | <b>X &gt; Y</b> | <b>X &gt; Y<br/>mediated</b> |
|------------------------------------|-----------------|-----------------|--------------------------------|-----------------|------------------------------|
| <b>7Networks_LH_Cont_PFCI_4</b>    |                 |                 |                                |                 |                              |
| <i>mean</i>                        | 4,1927          | -0,0728         | -3,95                          | -4,2537         | -0,3037                      |
| <i>std</i>                         | 1,3378          | 0,0277          | 1,2262                         | 1,2307          | 0,1537                       |
| <i>p</i>                           | 0,0007          | 0,0071          | 0,0015                         | 0,0009          | 0,0162                       |
| <b>7Networks_LH_Default_PFC_7</b>  |                 |                 |                                |                 |                              |
| <i>mean</i>                        | 4,1641          | -0,1137         | -3,465                         | -3,9369         | -0,4719                      |
| <i>std</i>                         | 1,332           | 0,0318          | 1,3845                         | 1,3912          | 0,2018                       |
| <i>p</i>                           | 0,0023          | 0,0003          | 0,0129                         | 0,0041          | 0,005                        |
| <b>7Networks_LH_Default_PFC_9</b>  |                 |                 |                                |                 |                              |
| <i>mean</i>                        | 4,1891          | -0,0924         | -3,9936                        | -4,38           | -0,3864                      |
| <i>std</i>                         | 1,3401          | 0,0312          | 1,374                          | 1,3812          | 0,1825                       |
| <i>p</i>                           | 0,004           | 0,0029          | 0,0014                         | 0,0003          | 0,0131                       |
| <b>7Networks_LH_Default_PFC_11</b> |                 |                 |                                |                 |                              |
| <i>mean</i>                        | 4,1476          | -0,1819         | -4,7158                        | -5,4693         | -0,7535                      |
| <i>std</i>                         | 1,3647          | 0,0294          | 1,3357                         | 1,3523          | 0,2773                       |
| <i>p</i>                           | 0,0014          | 0,0003          | 0,0002                         | 0,0003          | 0,003                        |
| <b>7Networks_LH_Default_PFC_12</b> |                 |                 |                                |                 |                              |
| <i>mean</i>                        | 4,1476          | -0,0836         | -2,8679                        | -3,2146         | -0,3466                      |
| <i>std</i>                         | 1,3306          | 0,0282          | 1,3769                         | 1,3866          | 0,1653                       |
| <i>p</i>                           | 0,002           | 0,0044          | 0,0364                         | 0,0227          | 0,0131                       |
| <b>7Networks_LH_Default_PFC_13</b> |                 |                 |                                |                 |                              |
| <i>mean</i>                        | 4,2008          | -0,0715         | -3,95                          | -4,2472         | -0,2972                      |
| <i>std</i>                         | 1,3327          | 0,0306          | 1,3694                         | 1,3723          | 0,1592                       |
| <i>p</i>                           | 0,0027          | 0,0205          | 0,0012                         | 0,0007          | 0,0432                       |
| <b>7Networks_RH_Default_PFCm_5</b> |                 |                 |                                |                 |                              |
| <i>mean</i>                        | 4,1516          | -0,1474         | -3,2194                        | -3,8306         | -0,6112                      |

|            |        |        |        |        |        |
|------------|--------|--------|--------|--------|--------|
| <i>std</i> | 1,3437 | 0,0293 | 1,3178 | 1,3424 | 0,234  |
| <i>p</i>   | 0,0009 | 0,0003 | 0,0129 | 0,0039 | 0,0021 |

**Supplementary Table 4a. Mediation of phenotypic relationship of Agreeableness with cortical thickness by intelligence (total cognitive score) in HCP.** For each mediation test the relation between personality and intelligence ( $X > M$ ), intelligence and brain ( $M > Y$ ), relationship between personality and brain unmediated (residual), relationship between personality > brain, and mediated relationship between personality and brain ( $X > M * M > Y$ ). Nomenclature of the regions is based on the official parcel names of the Schaefer 200 – 7 networks parcel solution.

|                                           |         |         |         |         |         |
|-------------------------------------------|---------|---------|---------|---------|---------|
| <b>7Networks_LH_Vis_14</b>                |         |         |         |         |         |
| <i>mean</i>                               | -3,4579 | -0,0164 | -3,6376 | -3,5826 | 0,055   |
| <i>std</i>                                | 1,0132  | 0,0308  | 0,9672  | 0,9621  | 0,1111  |
| <i>p</i>                                  | 0,0019  | 0,5795  | 0,0002  | 0,0002  | 0,5324  |
| <b>7Networks_LH_DorsAttn_FEF_2</b>        |         |         |         |         |         |
| <i>mean</i>                               | -3,4821 | -0,0758 | 2,8688  | 3,1337  | 0,2649  |
| <i>std</i>                                | 1,0069  | 0,031   | 1,0646  | 1,0658  | 0,1376  |
| <i>p</i>                                  | 0,0003  | 0,0162  | 0,0074  | 0,0038  | 0,0107  |
| <b>7Networks_LH_SalVentAttn_ParOper_2</b> |         |         |         |         |         |
| <i>mean</i>                               | -3,4836 | 0,0713  | 3,2862  | 3,0383  | -0,2479 |
| <i>std</i>                                | 1,018   | 0,0287  | 1,0193  | 1,0116  | 0,1258  |
| <i>p</i>                                  | 0,0003  | 0,0131  | 0,0004  | 0,0028  | 0,0213  |
| <b>7Networks_LH_Default_Temp_6</b>        |         |         |         |         |         |
| <i>mean</i>                               | -3,4613 | 0,069   | -2,79   | -3,028  | -0,238  |
| <i>std</i>                                | 1,0095  | 0,0303  | 1,0612  | 1,057   | 0,128   |
| <i>p</i>                                  | 0,0017  | 0,0228  | 0,0063  | 0,003   | 0,0412  |
| <b>7Networks_LH_Default_PFC_9</b>         |         |         |         |         |         |
| <i>mean</i>                               | -3,4868 | -0,0906 | 3,426   | 3,7433  | 0,3173  |
| <i>std</i>                                | 1,005   | 0,0309  | 1,0523  | 1,0506  | 0,1481  |
| <i>p</i>                                  | 0,0008  | 0,0041  | 0,0003  | 0,0003  | 0,0033  |
| <b>7Networks_LH_Default_PFC_11</b>        |         |         |         |         |         |
| <i>mean</i>                               | -3,4751 | -0,1853 | 2,2229  | 2,8674  | 0,6445  |
| <i>std</i>                                | 1,0102  | 0,03    | 1,0431  | 1,0576  | 0,2171  |
| <i>p</i>                                  | 0,0006  | 0,0004  | 0,0382  | 0,0119  | 0,0005  |
| <b>7Networks_RH_Cont_PFC1_6</b>           |         |         |         |         |         |
| <i>mean</i>                               | -3,4729 | -0,087  | 3,1641  | 3,4667  | 0,3026  |
| <i>std</i>                                | 1,0009  | 0,0306  | 1,0333  | 1,0331  | 0,1419  |
| <i>p</i>                                  | 0,0003  | 0,0041  | 0,002   | 0,0005  | 0,0025  |
| <b>7Networks_RH_Default_PFCm_5</b>        |         |         |         |         |         |
| <i>mean</i>                               | -3,491  | -0,1449 | 3,0807  | 3,5878  | 0,5071  |

|            |        |        |        |        |        |
|------------|--------|--------|--------|--------|--------|
| <i>std</i> | 1,0269 | 0,0292 | 1,0248 | 1,0284 | 0,1864 |
| <i>p</i>   | 0,0006 | 0,0003 | 0,0014 | 0,0007 | 0,0004 |

**Supplementary Table 4b. Mediation of phenotypic relationship of Neuroticism with cortical thickness by intelligence (total cognitive score) in HCP.** For each mediation test the relation between personality and intelligence ( $X > M$ ), intelligence and brain ( $M > Y$ ), relationship between personality and brain unmediated (residual), relationship between personality > brain, and mediated relationship between personality and brain ( $X > M * M > Y$ ). Nomenclature of the regions is based on the official parcel names of the Schaefer 200 – 7 networks parcel solution.

|                                        |        |         |         |         |         |
|----------------------------------------|--------|---------|---------|---------|---------|
| <b>7Networks_LH_Vis_1</b>              |        |         |         |         |         |
| <i>mean</i>                            | 9,5516 | 0,07    | 2,9474  | 3,6178  | 0,6703  |
| <i>std</i>                             | 1,1722 | 0,0328  | 1,4448  | 1,4028  | 0,3298  |
| <i>p</i>                               | 0,0004 | 0,0281  | 0,0451  | 0,014   | 0,024   |
| <b>7Networks_LH_SalVentAttn_PFC1_1</b> |        |         |         |         |         |
| <i>mean</i>                            | 9,555  | -0,1021 | -2,6757 | -3,6512 | -0,9755 |
| <i>std</i>                             | 1,173  | 0,0309  | 1,2662  | 1,2363  | 0,3206  |
| <i>p</i>                               | 0,0005 | 0,001   | 0,0315  | 0,0035  | 0,0013  |
| <b>7Networks_LH_Cont_PFC1_3</b>        |        |         |         |         |         |
| <i>mean</i>                            | 9,5113 | -0,0457 | -3,5776 | -4,0116 | -0,4341 |
| <i>std</i>                             | 1,1724 | 0,0295  | 1,3229  | 1,3032  | 0,2865  |
| <i>p</i>                               | 0,0003 | 0,1136  | 0,0083  | 0,0034  | 0,1318  |
| <b>7Networks_LH_Cont_PFC1_4</b>        |        |         |         |         |         |
| <i>mean</i>                            | 9,5422 | -0,056  | -4,2244 | -4,757  | -0,5326 |
| <i>std</i>                             | 1,1536 | 0,0276  | 1,1796  | 1,1658  | 0,2702  |
| <i>p</i>                               | 0,0004 | 0,0437  | 0,0003  | 0,0003  | 0,0496  |
| <b>7Networks_RH_Limbic_TempPole_1</b>  |        |         |         |         |         |
| <i>mean</i>                            | 9,5439 | 0,0853  | 4,4995  | 5,3135  | 0,814   |
| <i>std</i>                             | 1,1616 | 0,0346  | 1,4554  | 1,4421  | 0,3461  |
| <i>p</i>                               | 0,0004 | 0,0162  | 0,0017  | 0,0004  | 0,0131  |
| <b>7Networks_RH_Cont_PFC1_5</b>        |        |         |         |         |         |
| <i>mean</i>                            | 9,5311 | -0,091  | -3,0622 | -3,9291 | -0,8669 |
| <i>std</i>                             | 1,1608 | 0,0314  | 1,2414  | 1,2225  | 0,3194  |
| <i>p</i>                               | 0,0004 | 0,002   | 0,0129  | 0,0015  | 0,0025  |
| <b>7Networks_RH_Default_PCC_1</b>      |        |         |         |         |         |
| <i>mean</i>                            | 9,5402 | 0,1268  | 2,448   | 3,657   | 1,2089  |
| <i>std</i>                             | 1,1672 | 0,0333  | 1,4864  | 1,4742  | 0,3505  |
| <i>p</i>                               | 0,0004 | 0,0004  | 0,0954  | 0,014   | 0,0002  |

**Supplementary Table 4c. Mediation of phenotypic relationship of Openness with cortical thickness by intelligence (total cognitive score) in HCP.** For each mediation test the relation between personality and intelligence ( $X > M$ ), intelligence and brain ( $M$

> Y), relationship between personality and brain unmediated (residual), relationship between personality > brain, and mediated relationship between personality and brain (X>M \* M>Y). Nomenclature of the regions is based on the official parcel names of the Schaefer 200 – 7 networks parcel solution.

| Personality trait        | H <sup>2</sup> | SE   | p      |
|--------------------------|----------------|------|--------|
| <i>Agreeableness</i>     | 0.29           | 0.07 | 0.0000 |
| <i>Conscientiousness</i> | 0.43           | 0.06 | 0.0000 |
| <i>Extraversion</i>      | 0.43           | 0.05 | 0.0000 |
| <i>Neuroticism</i>       | 0.37           | 0.06 | 0.0000 |
| <i>Openness</i>          | 0.58           | 0.05 | 0.0000 |

**Supplementary Table 5. Heritability of personality traits.** Heritability of personality traits computed using Solar 8.4.0. Here we report heritability values, standard error, as well as p-values (displayed at 10<sup>-4</sup> accuracy).

| ROIS                  | H <sup>2</sup> | SE     | p      |
|-----------------------|----------------|--------|--------|
| 7Networks_LH_Vis_1    | 0.3960         | 0.0506 | 0.0000 |
| 7Networks_LH_Vis_2    | 0.3280         | 0.0555 | 0.0000 |
| 7Networks_LH_Vis_3    | 0.1523         | 0.0586 | 0.0036 |
| 7Networks_LH_Vis_4    | 0.4836         | 0.0439 | 0.0000 |
| 7Networks_LH_Vis_5    | 0.4083         | 0.0522 | 0.0000 |
| 7Networks_LH_Vis_6    | 0.4480         | 0.0501 | 0.0000 |
| 7Networks_LH_Vis_7    | 0.4963         | 0.0470 | 0.0000 |
| 7Networks_LH_Vis_8    | 0.2402         | 0.0513 | 0.0000 |
| 7Networks_LH_Vis_9    | 0.4775         | 0.0471 | 0.0000 |
| 7Networks_LH_Vis_10   | 0.5194         | 0.0463 | 0.0000 |
| 7Networks_LH_Vis_11   | 0.3290         | 0.0522 | 0.0000 |
| 7Networks_LH_Vis_12   | 0.4718         | 0.0516 | 0.0000 |
| 7Networks_LH_Vis_13   | 0.5551         | 0.0466 | 0.0000 |
| 7Networks_LH_Vis_14   | 0.4452         | 0.0519 | 0.0000 |
| 7Networks_LH_SomMot_1 | 0.4736         | 0.0497 | 0.0000 |
| 7Networks_LH_SomMot_2 | 0.2755         | 0.0555 | 0.0000 |
| 7Networks_LH_SomMot_3 | 0.5145         | 0.0480 | 0.0000 |
| 7Networks_LH_SomMot_4 | 0.3997         | 0.0531 | 0.0000 |
| 7Networks_LH_SomMot_5 | 0.2452         | 0.0547 | 0.0000 |
| 7Networks_LH_SomMot_6 | 0.5276         | 0.0462 | 0.0000 |
| 7Networks_LH_SomMot_7 | 0.2888         | 0.0575 | 0.0000 |
| 7Networks_LH_SomMot_8 | 0.2808         | 0.0589 | 0.0000 |
| 7Networks_LH_SomMot_9 | 0.3392         | 0.0544 | 0.0000 |

|                                    |        |        |        |
|------------------------------------|--------|--------|--------|
| 7Networks_LH_SomMot_10             | 0.5155 | 0.0479 | 0.0000 |
| 7Networks_LH_SomMot_11             | 0.2151 | 0.0550 | 0.0000 |
| 7Networks_LH_SomMot_12             | 0.3585 | 0.0543 | 0.0000 |
| 7Networks_LH_SomMot_13             | 0.3296 | 0.0584 | 0.0000 |
| 7Networks_LH_SomMot_14             | 0.3638 | 0.0514 | 0.0000 |
| 7Networks_LH_SomMot_15             | 0.4356 | 0.0492 | 0.0000 |
| 7Networks_LH_SomMot_16             | 0.4002 | 0.0578 | 0.0000 |
| 7Networks_LH_DorsAttn_Post_1       | 0.3267 | 0.0586 | 0.0000 |
| 7Networks_LH_DorsAttn_Post_2       | 0.2151 | 0.0535 | 0.0000 |
| 7Networks_LH_DorsAttn_Post_3       | 0.3442 | 0.0544 | 0.0000 |
| 7Networks_LH_DorsAttn_Post_4       | 0.3499 | 0.0561 | 0.0000 |
| 7Networks_LH_DorsAttn_Post_5       | 0.2148 | 0.0550 | 0.0000 |
| 7Networks_LH_DorsAttn_Post_6       | 0.2283 | 0.0590 | 0.0000 |
| 7Networks_LH_DorsAttn_Post_7       | 0.4602 | 0.0527 | 0.0000 |
| 7Networks_LH_DorsAttn_Post_8       | 0.3059 | 0.0551 | 0.0000 |
| 7Networks_LH_DorsAttn_Post_9       | 0.4502 | 0.0506 | 0.0000 |
| 7Networks_LH_DorsAttn_Post_10      | 0.4682 | 0.0529 | 0.0000 |
| 7Networks_LH_DorsAttn_FEF_1        | 0.2673 | 0.0550 | 0.0000 |
| 7Networks_LH_DorsAttn_FEF_2        | 0.3613 | 0.0562 | 0.0000 |
| 7Networks_LH_DorsAttn_PrCv_1       | 0.1866 | 0.0585 | 0.0005 |
| 7Networks_LH_SalVentAttn_ParOper_1 | 0.1303 | 0.0574 | 0.0096 |
| 7Networks_LH_SalVentAttn_ParOper_2 | 0.2800 | 0.0527 | 0.0000 |
| 7Networks_LH_SalVentAttn_ParOper_3 | 0.2185 | 0.0581 | 0.0000 |
| 7Networks_LH_SalVentAttn_FrOper_1  | 0.3500 | 0.0537 | 0.0000 |
| 7Networks_LH_SalVentAttn_FrOper_2  | 0.4083 | 0.0535 | 0.0000 |
| 7Networks_LH_SalVentAttn_FrOper_3  | 0.4316 | 0.0528 | 0.0000 |
| 7Networks_LH_SalVentAttn_FrOper_4  | 0.2426 | 0.0610 | 0.0000 |
| 7Networks_LH_SalVentAttn_PFC1_1    | 0.4391 | 0.0476 | 0.0000 |
| 7Networks_LH_SalVentAttn_Med_1     | 0.3362 | 0.0589 | 0.0000 |
| 7Networks_LH_SalVentAttn_Med_2     | 0.3337 | 0.0577 | 0.0000 |
| 7Networks_LH_SalVentAttn_Med_3     | 0.2462 | 0.0571 | 0.0000 |
| 7Networks_LH_Limbic_OFC_1          | 0.2963 | 0.0532 | 0.0000 |
| 7Networks_LH_Limbic_OFC_2          | 0.3585 | 0.0556 | 0.0000 |
| 7Networks_LH_Limbic_TempPole_1     | 0.3385 | 0.0583 | 0.0000 |
| 7Networks_LH_Limbic_TempPole_2     | 0.3692 | 0.0498 | 0.0000 |
| 7Networks_LH_Limbic_TempPole_3     | 0.2432 | 0.0529 | 0.0000 |

|                                |        |        |        |
|--------------------------------|--------|--------|--------|
| 7Networks_LH_Limbic_TempPole_4 | 0.4492 | 0.0520 | 0.0000 |
| 7Networks_LH_Cont_Par_1        | 0.2170 | 0.0570 | 0.0000 |
| 7Networks_LH_Cont_Par_2        | 0.2715 | 0.0536 | 0.0000 |
| 7Networks_LH_Cont_Par_3        | 0.0448 | 0.0556 | 0.2068 |
| 7Networks_LH_Cont_Temp_1       | 0.1930 | 0.0574 | 0.0003 |
| 7Networks_LH_Cont_PFC1_1       | 0.2604 | 0.0512 | 0.0000 |
| 7Networks_LH_Cont_PFC1_2       | 0.2964 | 0.0557 | 0.0000 |
| 7Networks_LH_Cont_PFC1_3       | 0.3926 | 0.0532 | 0.0000 |
| 7Networks_LH_Cont_PFC1_4       | 0.2659 | 0.0547 | 0.0000 |
| 7Networks_LH_Cont_PFC1_5       | 0.4091 | 0.0501 | 0.0000 |
| 7Networks_LH_Cont_PFC1_6       | 0.2063 | 0.0572 | 0.0001 |
| 7Networks_LH_Cont_pCun_1       | 0.3744 | 0.0516 | 0.0000 |
| 7Networks_LH_Cont_Cing_1       | 0.5313 | 0.0487 | 0.0000 |
| 7Networks_LH_Cont_Cing_2       | 0.3678 | 0.0568 | 0.0000 |
| 7Networks_LH_Default_Temp_1    | 0.2854 | 0.0595 | 0.0000 |
| 7Networks_LH_Default_Temp_2    | 0.2831 | 0.0547 | 0.0000 |
| 7Networks_LH_Default_Temp_3    | 0.3428 | 0.0543 | 0.0000 |
| 7Networks_LH_Default_Temp_4    | 0.1930 | 0.0585 | 0.0004 |
| 7Networks_LH_Default_Temp_5    | 0.2131 | 0.0585 | 0.0001 |
| 7Networks_LH_Default_Temp_6    | 0.2821 | 0.0539 | 0.0000 |
| 7Networks_LH_Default_Temp_7    | 0.3019 | 0.0572 | 0.0000 |
| 7Networks_LH_Default_Temp_8    | 0.2422 | 0.0561 | 0.0000 |
| 7Networks_LH_Default_Temp_9    | 0.2643 | 0.0520 | 0.0000 |
| 7Networks_LH_Default_PFC_1     | 0.3635 | 0.0525 | 0.0000 |
| 7Networks_LH_Default_PFC_2     | 0.2708 | 0.0581 | 0.0000 |
| 7Networks_LH_Default_PFC_3     | 0.1493 | 0.0560 | 0.0032 |
| 7Networks_LH_Default_PFC_4     | 0.5135 | 0.0459 | 0.0000 |
| 7Networks_LH_Default_PFC_5     | 0.3168 | 0.0578 | 0.0000 |
| 7Networks_LH_Default_PFC_6     | 0.3310 | 0.0538 | 0.0000 |
| 7Networks_LH_Default_PFC_7     | 0.5053 | 0.0483 | 0.0000 |
| 7Networks_LH_Default_PFC_8     | 0.3889 | 0.0572 | 0.0000 |
| 7Networks_LH_Default_PFC_9     | 0.4656 | 0.0478 | 0.0000 |
| 7Networks_LH_Default_PFC_10    | 0.3767 | 0.0515 | 0.0000 |
| 7Networks_LH_Default_PFC_11    | 0.4263 | 0.0481 | 0.0000 |
| 7Networks_LH_Default_PFC_12    | 0.4694 | 0.0486 | 0.0000 |
| 7Networks_LH_Default_PFC_13    | 0.4649 | 0.0493 | 0.0000 |

|                            |        |        |        |
|----------------------------|--------|--------|--------|
| 7Networks_LH_Default_PCC_1 | 0.3913 | 0.0550 | 0.0000 |
| 7Networks_LH_Default_PCC_2 | 0.2794 | 0.0537 | 0.0000 |
| 7Networks_LH_Default_PCC_3 | 0.3900 | 0.0539 | 0.0000 |
| 7Networks_LH_Default_PCC_4 | 0.3922 | 0.0556 | 0.0000 |
| 7Networks_LH_Default_PHC_1 | 0.4640 | 0.0536 | 0.0000 |
| 7Networks_RH_Vis_1         | 0.3649 | 0.0531 | 0.0000 |
| 7Networks_RH_Vis_2         | 0.3496 | 0.0569 | 0.0000 |
| 7Networks_RH_Vis_3         | 0.3773 | 0.0566 | 0.0000 |
| 7Networks_RH_Vis_4         | 0.5840 | 0.0417 | 0.0000 |
| 7Networks_RH_Vis_5         | 0.2794 | 0.0551 | 0.0000 |
| 7Networks_RH_Vis_6         | 0.4662 | 0.0502 | 0.0000 |
| 7Networks_RH_Vis_7         | 0.5079 | 0.0463 | 0.0000 |
| 7Networks_RH_Vis_8         | 0.4341 | 0.0539 | 0.0000 |
| 7Networks_RH_Vis_9         | 0.5773 | 0.0433 | 0.0000 |
| 7Networks_RH_Vis_10        | 0.4768 | 0.0535 | 0.0000 |
| 7Networks_RH_Vis_11        | 0.2379 | 0.0536 | 0.0000 |
| 7Networks_RH_Vis_12        | 0.5188 | 0.0479 | 0.0000 |
| 7Networks_RH_Vis_13        | 0.4779 | 0.0490 | 0.0000 |
| 7Networks_RH_Vis_14        | 0.4356 | 0.0522 | 0.0000 |
| 7Networks_RH_Vis_15        | 0.2731 | 0.0558 | 0.0000 |
| 7Networks_RH_SomMot_1      | 0.4370 | 0.0532 | 0.0000 |
| 7Networks_RH_SomMot_2      | 0.3421 | 0.0590 | 0.0000 |
| 7Networks_RH_SomMot_3      | 0.3498 | 0.0573 | 0.0000 |
| 7Networks_RH_SomMot_4      | 0.3403 | 0.0554 | 0.0000 |
| 7Networks_RH_SomMot_5      | 0.1911 | 0.0576 | 0.0003 |
| 7Networks_RH_SomMot_6      | 0.2971 | 0.0572 | 0.0000 |
| 7Networks_RH_SomMot_7      | 0.4346 | 0.0501 | 0.0000 |
| 7Networks_RH_SomMot_8      | 0.1921 | 0.0546 | 0.0001 |
| 7Networks_RH_SomMot_9      | 0.3351 | 0.0603 | 0.0000 |
| 7Networks_RH_SomMot_10     | 0.1718 | 0.0602 | 0.0016 |
| 7Networks_RH_SomMot_11     | 0.3010 | 0.0532 | 0.0000 |
| 7Networks_RH_SomMot_12     | 0.4576 | 0.0501 | 0.0000 |
| 7Networks_RH_SomMot_13     | 0.3075 | 0.0531 | 0.0000 |
| 7Networks_RH_SomMot_14     | 0.3848 | 0.0524 | 0.0000 |
| 7Networks_RH_SomMot_15     | 0.3496 | 0.0590 | 0.0000 |
| 7Networks_RH_SomMot_16     | 0.2815 | 0.0593 | 0.0000 |

|                                       |        |        |        |
|---------------------------------------|--------|--------|--------|
| 7Networks_RH_SomMot_17                | 0.4880 | 0.0494 | 0.0000 |
| 7Networks_RH_SomMot_18                | 0.3781 | 0.0504 | 0.0000 |
| 7Networks_RH_SomMot_19                | 0.4382 | 0.0534 | 0.0000 |
| 7Networks_RH_DorsAttn_Post_1          | 0.2420 | 0.0563 | 0.0000 |
| 7Networks_RH_DorsAttn_Post_2          | 0.2431 | 0.0565 | 0.0000 |
| 7Networks_RH_DorsAttn_Post_3          | 0.3086 | 0.0533 | 0.0000 |
| 7Networks_RH_DorsAttn_Post_4          | 0.2197 | 0.0572 | 0.0000 |
| 7Networks_RH_DorsAttn_Post_5          | 0.1940 | 0.0576 | 0.0002 |
| 7Networks_RH_DorsAttn_Post_6          | 0.3929 | 0.0523 | 0.0000 |
| 7Networks_RH_DorsAttn_Post_7          | 0.1424 | 0.0564 | 0.0047 |
| 7Networks_RH_DorsAttn_Post_8          | 0.3550 | 0.0542 | 0.0000 |
| 7Networks_RH_DorsAttn_Post_9          | 0.3334 | 0.0539 | 0.0000 |
| 7Networks_RH_DorsAttn_Post_10         | 0.4139 | 0.0513 | 0.0000 |
| 7Networks_RH_DorsAttn_FEF_1           | 0.3090 | 0.0586 | 0.0000 |
| 7Networks_RH_DorsAttn_FEF_2           | 0.2329 | 0.0569 | 0.0000 |
| 7Networks_RH_DorsAttn_PrCv_1          | 0.3154 | 0.0553 | 0.0000 |
| 7Networks_RH_SalVentAttn_TempOccPar_1 | 0.2310 | 0.0572 | 0.0000 |
| 7Networks_RH_SalVentAttn_TempOccPar_2 | 0.1702 | 0.0549 | 0.0008 |
| 7Networks_RH_SalVentAttn_TempOccPar_3 | 0.2479 | 0.0547 | 0.0000 |
| 7Networks_RH_SalVentAttn_PrC_1        | 0.1571 | 0.0568 | 0.0022 |
| 7Networks_RH_SalVentAttn_FrOper_1     | 0.2728 | 0.0570 | 0.0000 |
| 7Networks_RH_SalVentAttn_FrOper_2     | 0.5003 | 0.0520 | 0.0000 |
| 7Networks_RH_SalVentAttn_FrOper_3     | 0.3183 | 0.0530 | 0.0000 |
| 7Networks_RH_SalVentAttn_FrOper_4     | 0.2536 | 0.0567 | 0.0000 |
| 7Networks_RH_SalVentAttn_Med_1        | 0.2638 | 0.0558 | 0.0000 |
| 7Networks_RH_SalVentAttn_Med_2        | 0.4131 | 0.0515 | 0.0000 |
| 7Networks_RH_SalVentAttn_Med_3        | 0.3440 | 0.0594 | 0.0000 |
| 7Networks_RH_Limbic_OFC_1             | 0.4121 | 0.0566 | 0.0000 |
| 7Networks_RH_Limbic_OFC_2             | 0.3526 | 0.0496 | 0.0000 |
| 7Networks_RH_Limbic_OFC_3             | 0.3785 | 0.0545 | 0.0000 |
| 7Networks_RH_Limbic_TempPole_1        | 0.1799 | 0.0560 | 0.0005 |
| 7Networks_RH_Limbic_TempPole_2        | 0.3495 | 0.0556 | 0.0000 |
| 7Networks_RH_Limbic_TempPole_3        | 0.5059 | 0.0498 | 0.0000 |
| 7Networks_RH_Cont_Par_1               | 0.1538 | 0.0562 | 0.0021 |
| 7Networks_RH_Cont_Par_2               | 0.1959 | 0.0554 | 0.0001 |
| 7Networks_RH_Cont_Par_3               | 0.1328 | 0.0566 | 0.0081 |



|                             |        |        |        |
|-----------------------------|--------|--------|--------|
| 7Networks_RH_Cont_Temp_1    | 0.2258 | 0.0600 | 0.0000 |
| 7Networks_RH_Cont_PFCv_1    | 0.2109 | 0.0579 | 0.0001 |
| 7Networks_RH_Cont_PFCI_1    | 0.2699 | 0.0546 | 0.0000 |
| 7Networks_RH_Cont_PFCI_2    | 0.3055 | 0.0549 | 0.0000 |
| 7Networks_RH_Cont_PFCI_3    | 0.3266 | 0.0515 | 0.0000 |
| 7Networks_RH_Cont_PFCI_4    | 0.4177 | 0.0506 | 0.0000 |
| 7Networks_RH_Cont_PFCI_5    | 0.3271 | 0.0519 | 0.0000 |
| 7Networks_RH_Cont_PFCI_6    | 0.3110 | 0.0512 | 0.0000 |
| 7Networks_RH_Cont_PFCI_7    | 0.3489 | 0.0573 | 0.0000 |
| 7Networks_RH_Cont_pCun_1    | 0.2582 | 0.0545 | 0.0000 |
| 7Networks_RH_Cont_PFCmp_1   | 0.4633 | 0.0479 | 0.0000 |
| 7Networks_RH_Cont_PFCmp_2   | 0.4163 | 0.0537 | 0.0000 |
| 7Networks_RH_Cont_PFCmp_3   | 0.2755 | 0.0573 | 0.0000 |
| 7Networks_RH_Cont_PFCmp_4   | 0.4503 | 0.0546 | 0.0000 |
| 7Networks_RH_Default_Par_1  | 0.2263 | 0.0589 | 0.0000 |
| 7Networks_RH_Default_Par_2  | 0.2045 | 0.0563 | 0.0001 |
| 7Networks_RH_Default_Par_3  | 0.1980 | 0.0561 | 0.0001 |
| 7Networks_RH_Default_Temp_1 | 0.3255 | 0.0543 | 0.0000 |
| 7Networks_RH_Default_Temp_2 | 0.3169 | 0.0556 | 0.0000 |
| 7Networks_RH_Default_Temp_3 | 0.4308 | 0.0562 | 0.0000 |
| 7Networks_RH_Default_Temp_4 | 0.2967 | 0.0533 | 0.0000 |
| 7Networks_RH_Default_Temp_5 | 0.2504 | 0.0595 | 0.0000 |
| 7Networks_RH_Default_PFCv_1 | 0.3596 | 0.0550 | 0.0000 |
| 7Networks_RH_Default_PFCm_1 | 0.2831 | 0.0532 | 0.0000 |
| 7Networks_RH_Default_PFCm_2 | 0.2488 | 0.0552 | 0.0000 |
| 7Networks_RH_Default_PFCm_3 | 0.3565 | 0.0609 | 0.0000 |
| 7Networks_RH_Default_PFCm_4 | 0.5538 | 0.0463 | 0.0000 |
| 7Networks_RH_Default_PFCm_5 | 0.4769 | 0.0474 | 0.0000 |
| 7Networks_RH_Default_PFCm_6 | 0.3159 | 0.0539 | 0.0000 |
| 7Networks_RH_Default_PFCm_7 | 0.1779 | 0.0539 | 0.0003 |
| 7Networks_RH_Default_PCC_1  | 0.3857 | 0.0577 | 0.0000 |
| 7Networks_RH_Default_PCC_2  | 0.4159 | 0.0549 | 0.0000 |
| 7Networks_RH_Default_PCC_3  | 0.2319 | 0.0547 | 0.0000 |

**Supplementary Table 6. Heritability of cortical thickness.** Heritability of cortical thickness calculated using solar 8.4.0. regions are named according to the Schaefer 200 atlas, based on 7-networks. Here we report heritability values, standard errors (SE), and

p-values. All regions were significantly heritable at  $FDRq < 0.05$ , with the exception of *7Networks\_LH\_Cont\_Par\_3*, which is highlighted in yellow. Nomenclature of the regions is based on the official parcel names of the Schaefer 200 – 7 networks parcel solution.

| ROI                          | $\rho_e$   | P         | $\rho_g$   | P         |
|------------------------------|------------|-----------|------------|-----------|
| 7Networks_LH_Vis_1           | -0,079052  | 0,19729   | 0,18676    | 0,14884   |
| 7Networks_LH_Vis_2           | 0,012668   | 0,83697   | 0,063927   | 0,66213   |
| 7Networks_LH_Vis_3           | -0,065285  | 0,26767   | 0,16731    | 0,44393   |
| 7Networks_LH_Vis_4           | -0,11466   | 0,061538  | 0,2425     | 0,034865  |
| 7Networks_LH_Vis_5           | 0,075226   | 0,23203   | -0,0003708 | 0,99701   |
| 7Networks_LH_Vis_6           | -0,062598  | 0,32606   | 0,020191   | 0,87028   |
| 7Networks_LH_Vis_7           | -0,0004927 | 0,99382   | 0,1427     | 0,21894   |
| 7Networks_LH_Vis_8           | -0,057216  | 0,31688   | 0,14571    | 0,35828   |
| 7Networks_LH_Vis_9           | -0,050569  | 0,42351   | 0,28583    | 0,014601  |
| 7Networks_LH_Vis_10          | -0,18542   | 0,0039403 | 0,35907    | 0,0013726 |
| 7Networks_LH_Vis_11          | 0,055302   | 0,35692   | 0,036676   | 0,79524   |
| 7Networks_LH_Vis_12          | -0,058799  | 0,37029   | 0,15021    | 0,2271    |
| 7Networks_LH_Vis_13          | 0,054723   | 0,42117   | 0,033513   | 0,76768   |
| 7Networks_LH_Vis_14          | 0,097218   | 0,1308    | 0,026523   | 0,83438   |
| 7Networks_LH_SomMot_1        | 0,025695   | 0,69266   | 0,0049152  | 0,96785   |
| 7Networks_LH_SomMot_2        | 0,081928   | 0,17203   | 0,018946   | 0,90512   |
| 7Networks_LH_SomMot_3        | 0,031826   | 0,63064   | 0,077473   | 0,5073    |
| 7Networks_LH_SomMot_4        | 0,011344   | 0,85787   | -0,048262  | 0,71566   |
| 7Networks_LH_SomMot_5        | -0,019742  | 0,73747   | -0,025311  | 0,87739   |
| 7Networks_LH_SomMot_6        | 0,0066233  | 0,91986   | 0,12049    | 0,29016   |
| 7Networks_LH_SomMot_7        | 0,015863   | 0,79591   | -0,18177   | 0,25798   |
| 7Networks_LH_SomMot_8        | -0,033367  | 0,58906   | 0,0038403  | 0,98099   |
| 7Networks_LH_SomMot_9        | -0,048875  | 0,42583   | 0,046745   | 0,74453   |
| 7Networks_LH_SomMot_10       | 0,035033   | 0,59616   | 0,096343   | 0,41044   |
| 7Networks_LH_SomMot_11       | -0,05484   | 0,34707   | -0,0005635 | 0,99748   |
| 7Networks_LH_SomMot_12       | -0,0072036 | 0,90763   | -0,1773    | 0,21072   |
| 7Networks_LH_SomMot_13       | -0,063163  | 0,31636   | 0,039682   | 0,79395   |
| 7Networks_LH_SomMot_14       | 0,0032122  | 0,95786   | -0,12451   | 0,35643   |
| 7Networks_LH_SomMot_15       | -0,03197   | 0,6117    | 0,034414   | 0,78044   |
| 7Networks_LH_SomMot_16       | 0,059943   | 0,3715    | -0,099077  | 0,47536   |
| 7Networks_LH_DorsAttn_Post_1 | -0,05155   | 0,4141    | 0,12269    | 0,41534   |
| 7Networks_LH_DorsAttn_Post_2 | -0,083855  | 0,14368   | 0,27419    | 0,11542   |
| 7Networks_LH_DorsAttn_Post_3 | -0,059709  | 0,33232   | 0,12045    | 0,3938    |
| 7Networks_LH_DorsAttn_Post_4 | 0,06774    | 0,27799   | 0,074927   | 0,60125   |
| 7Networks_LH_DorsAttn_Post_5 | -0,024555  | 0,67318   | 0,14005    | 0,42657   |
| 7Networks_LH_DorsAttn_Post_6 | -0,025155  | 0,67756   | 0,15936    | 0,36807   |
| 7Networks_LH_DorsAttn_Post_7 | 0,011903   | 0,85534   | -0,24582   | 0,048949  |
| 7Networks_LH_DorsAttn_Post_8 | -0,072651  | 0,23102   | -0,053424  | 0,72122   |

|                                    |            |           |            |          |
|------------------------------------|------------|-----------|------------|----------|
| 7Networks_LH_DorsAttn_Post_9       | 0,063859   | 0,32607   | -0,26818   | 0,025986 |
| 7Networks_LH_DorsAttn_Post_10      | 0,026982   | 0,68308   | -0,071597  | 0,56751  |
| 7Networks_LH_DorsAttn_FEF_1        | -0,039598  | 0,50895   | -0,012733  | 0,93624  |
| 7Networks_LH_DorsAttn_FEF_2        | 0,0066935  | 0,91562   | -0,25164   | 0,073418 |
| 7Networks_LH_DorsAttn_PrCv_1       | 0,015117   | 0,79866   | -0,22564   | 0,2397   |
| 7Networks_LH_SalVentAttn_ParOper_1 | -0,0025321 | 0,96536   | 0,32611    | 0,14177  |
| 7Networks_LH_SalVentAttn_ParOper_2 | 0,032171   | 0,5844    | -0,0705    | 0,64219  |
| 7Networks_LH_SalVentAttn_ParOper_3 | 0,0063434  | 0,91621   | -0,009796  | 0,9559   |
| 7Networks_LH_SalVentAttn_FrOper_1  | 0,0027538  | 0,96426   | 0,0071485  | 0,95907  |
| 7Networks_LH_SalVentAttn_FrOper_2  | 0,040815   | 0,5263    | 0,038533   | 0,77339  |
| 7Networks_LH_SalVentAttn_FrOper_3  | -0,002797  | 0,96532   | 0,10839    | 0,39938  |
| 7Networks_LH_SalVentAttn_FrOper_4  | 0,0055092  | 0,92869   | -0,078883  | 0,6509   |
| 7Networks_LH_SalVentAttn_PFC1_1    | 0,02871    | 0,64372   | -0,1678    | 0,16588  |
| 7Networks_LH_SalVentAttn_Med_1     | 0,0555     | 0,38128   | -0,036957  | 0,80586  |
| 7Networks_LH_SalVentAttn_Med_2     | -0,046889  | 0,45594   | 0,1865     | 0,20748  |
| 7Networks_LH_SalVentAttn_Med_3     | 0,11748    | 0,051188  | -0,358     | 0,034025 |
| 7Networks_LH_Limbic_OFC_1          | 0,10849    | 0,065906  | -0,27566   | 0,062208 |
| 7Networks_LH_Limbic_OFC_2          | -0,0020436 | 0,97408   | 0,098323   | 0,49165  |
| 7Networks_LH_Limbic_TempPole_1     | 0,064778   | 0,30702   | -0,038212  | 0,79566  |
| 7Networks_LH_Limbic_TempPole_2     | -0,0096495 | 0,87326   | 0,091728   | 0,49251  |
| 7Networks_LH_Limbic_TempPole_3     | -0,0067672 | 0,90693   | 0,10621    | 0,50931  |
| 7Networks_LH_Limbic_TempPole_4     | 0,0095145  | 0,88315   | -0,0074987 | 0,95256  |
| 7Networks_LH_Cont_Par_1            | 0,014026   | 0,81303   | -0,044135  | 0,80398  |
| 7Networks_LH_Cont_Par_2            | 0,037755   | 0,52275   | -0,17838   | 0,24893  |
| 7Networks_LH_Cont_Par_3            | -0,02525   | 0,6534    | 0,37426    | 0,32587  |
| 7Networks_LH_Cont_Temp_1           | 0,084383   | 0,15001   | -0,14186   | 0,44977  |
| 7Networks_LH_Cont_PFC1_1           | 0,022654   | 0,69314   | 0,075481   | 0,62386  |
| 7Networks_LH_Cont_PFC1_2           | 0,052698   | 0,38374   | -0,22256   | 0,14458  |
| 7Networks_LH_Cont_PFC1_3           | -0,0023602 | 0,97009   | -0,044528  | 0,73868  |
| 7Networks_LH_Cont_PFC1_4           | -0,12144   | 0,040379  | -0,080271  | 0,61394  |
| 7Networks_LH_Cont_PFC1_5           | -0,041619  | 0,50252   | -0,12044   | 0,34663  |
| 7Networks_LH_Cont_PFC1_6           | -0,010749  | 0,85558   | -0,095273  | 0,60287  |
| 7Networks_LH_Cont_pCun_1           | -0,016957  | 0,78178   | -0,098956  | 0,4593   |
| 7Networks_LH_Cont_Cing_1           | -0,079363  | 0,24079   | 0,017564   | 0,881    |
| 7Networks_LH_Cont_Cing_2           | 0,0075894  | 0,90506   | -0,08263   | 0,55828  |
| 7Networks_LH_Default_Temp_1        | -0,069696  | 0,26057   | 0,25444    | 0,11437  |
| 7Networks_LH_Default_Temp_2        | 0,16512    | 0,0050416 | -0,2983    | 0,055193 |
| 7Networks_LH_Default_Temp_3        | 0,0001054  | 0,99805   | 0,19144    | 0,17682  |
| 7Networks_LH_Default_Temp_4        | 0,043015   | 0,46868   | 0,13858    | 0,4665   |

|                             |            |          |           |           |
|-----------------------------|------------|----------|-----------|-----------|
| 7Networks_LH_Default_Temp_5 | -0,15362   | 0,011314 | 0,59788   | 0,0004934 |
| 7Networks_LH_Default_Temp_6 | -0,040484  | 0,49612  | 0,18066   | 0,23753   |
| 7Networks_LH_Default_Temp_7 | -0,0061987 | 0,91969  | -0,098815 | 0,52125   |
| 7Networks_LH_Default_Temp_8 | -0,058035  | 0,33503  | 0,19464   | 0,23756   |
| 7Networks_LH_Default_Temp_9 | 0,0012862  | 0,9823   | -0,094239 | 0,54007   |
| 7Networks_LH_Default_PFC_1  | -0,026717  | 0,66231  | 0,13345   | 0,32796   |
| 7Networks_LH_Default_PFC_2  | 0,14148    | 0,019489 | -0,28872  | 0,077282  |
| 7Networks_LH_Default_PFC_3  | 0,097464   | 0,088585 | -0,39062  | 0,061042  |
| 7Networks_LH_Default_PFC_4  | 0,033147   | 0,60829  | -0,17588  | 0,12119   |
| 7Networks_LH_Default_PFC_5  | -0,10377   | 0,095584 | -0,017451 | 0,90815   |
| 7Networks_LH_Default_PFC_6  | -0,018674  | 0,75928  | -0,023309 | 0,87077   |
| 7Networks_LH_Default_PFC_7  | -0,013331  | 0,83922  | -0,22214  | 0,061045  |
| 7Networks_LH_Default_PFC_8  | -0,045787  | 0,47826  | 0,11445   | 0,41756   |
| 7Networks_LH_Default_PFC_9  | -0,048351  | 0,44487  | -0,21022  | 0,078581  |
| 7Networks_LH_Default_PFC_10 | -0,046104  | 0,45976  | -0,039388 | 0,77116   |
| 7Networks_LH_Default_PFC_11 | 0,0078701  | 0,89816  | -0,35606  | 0,0037521 |
| 7Networks_LH_Default_PFC_12 | -0,039602  | 0,53482  | -0,16614  | 0,16671   |
| 7Networks_LH_Default_PFC_13 | -0,0231    | 0,71745  | -0,2591   | 0,033329  |
| 7Networks_LH_Default_PCC_1  | -0,095588  | 0,13269  | 0,15406   | 0,27152   |
| 7Networks_LH_Default_PCC_2  | -0,099767  | 0,092117 | 0,30689   | 0,044508  |
| 7Networks_LH_Default_PCC_3  | -0,064521  | 0,30722  | 0,099199  | 0,46033   |
| 7Networks_LH_Default_PCC_4  | -0,053317  | 0,40417  | 0,12529   | 0,36301   |
| 7Networks_LH_Default_PHC_1  | 0,06492    | 0,32866  | -0,11549  | 0,36047   |
| 7Networks_RH_Vis_1          | 0,01526    | 0,80482  | 0,16498   | 0,23323   |
| 7Networks_RH_Vis_2          | -0,040559  | 0,51608  | 0,3075    | 0,0359    |
| 7Networks_RH_Vis_3          | -0,1453    | 0,021953 | 0,33979   | 0,015079  |
| 7Networks_RH_Vis_4          | -0,12988   | 0,049683 | 0,31992   | 0,0028168 |
| 7Networks_RH_Vis_5          | 0,033343   | 0,57817  | 0,013407  | 0,93125   |
| 7Networks_RH_Vis_6          | -0,0071607 | 0,91131  | 0,1408    | 0,25239   |
| 7Networks_RH_Vis_7          | -0,12116   | 0,060626 | 0,049553  | 0,66559   |
| 7Networks_RH_Vis_8          | -0,040656  | 0,52823  | 0,20938   | 0,10582   |
| 7Networks_RH_Vis_9          | -0,080138  | 0,22911  | 0,26415   | 0,016985  |
| 7Networks_RH_Vis_10         | -0,028164  | 0,67088  | 0,1684    | 0,1765    |
| 7Networks_RH_Vis_11         | 0,025049   | 0,66596  | 0,1055    | 0,52108   |
| 7Networks_RH_Vis_12         | 0,035559   | 0,59216  | 0,1063    | 0,36182   |
| 7Networks_RH_Vis_13         | 0,04067    | 0,52977  | 0,074824  | 0,53406   |
| 7Networks_RH_Vis_14         | 0,07806    | 0,22609  | -0,26922  | 0,03158   |
| 7Networks_RH_Vis_15         | 0,078028   | 0,19353  | -0,024067 | 0,87919   |
| 7Networks_RH_SomMot_1       | 0,11893    | 0,066284 | -0,090136 | 0,48669   |

|                                       |            |           |           |          |
|---------------------------------------|------------|-----------|-----------|----------|
| 7Networks_RH_SomMot_2                 | 0,097147   | 0,12609   | -0,022086 | 0,88268  |
| 7Networks_RH_SomMot_3                 | -0,0080235 | 0,89874   | 0,08856   | 0,54096  |
| 7Networks_RH_SomMot_4                 | 0,029742   | 0,63395   | 0,14224   | 0,32241  |
| 7Networks_RH_SomMot_5                 | 0,0098532  | 0,86777   | 0,18981   | 0,31908  |
| 7Networks_RH_SomMot_6                 | 0,028825   | 0,63982   | -0,073608 | 0,63328  |
| 7Networks_RH_SomMot_7                 | 0,052779   | 0,40199   | 0,14991   | 0,22949  |
| 7Networks_RH_SomMot_8                 | 0,13449    | 0,019246  | -0,22895  | 0,21083  |
| 7Networks_RH_SomMot_9                 | 0,010379   | 0,87072   | 0,19935   | 0,18581  |
| 7Networks_RH_SomMot_10                | 0,077136   | 0,19962   | -0,043387 | 0,83579  |
| 7Networks_RH_SomMot_11                | 0,19243    | 0,0011463 | -0,31677  | 0,031319 |
| 7Networks_RH_SomMot_12                | 0,064576   | 0,31419   | 0,075429  | 0,54191  |
| 7Networks_RH_SomMot_13                | -0,015987  | 0,78848   | 0,12894   | 0,37851  |
| 7Networks_RH_SomMot_14                | -0,034907  | 0,5747    | -0,093961 | 0,48366  |
| 7Networks_RH_SomMot_15                | -0,11791   | 0,06322   | 0,27408   | 0,059718 |
| 7Networks_RH_SomMot_16                | 0,0019755  | 0,9746    | 0,0013636 | 0,99314  |
| 7Networks_RH_SomMot_17                | -0,01335   | 0,8384    | 0,019774  | 0,86923  |
| 7Networks_RH_SomMot_18                | 0,069773   | 0,25036   | -0,088504 | 0,49984  |
| 7Networks_RH_SomMot_19                | 0,13469    | 0,038284  | -0,21184  | 0,10014  |
| 7Networks_RH_DorsAttn_Post_1          | -0,05627   | 0,34214   | 0,34532   | 0,042578 |
| 7Networks_RH_DorsAttn_Post_2          | 0,0057328  | 0,92329   | 0,13699   | 0,41797  |
| 7Networks_RH_DorsAttn_Post_3          | 0,097877   | 0,1024    | -0,054596 | 0,70936  |
| 7Networks_RH_DorsAttn_Post_4          | -0,039292  | 0,50859   | 0,11921   | 0,50315  |
| 7Networks_RH_DorsAttn_Post_5          | 0,031397   | 0,59703   | 0,15275   | 0,41654  |
| 7Networks_RH_DorsAttn_Post_6          | 0,079684   | 0,20391   | -0,21119  | 0,1034   |
| 7Networks_RH_DorsAttn_Post_7          | -0,0195    | 0,73558   | -0,02258  | 0,91652  |
| 7Networks_RH_DorsAttn_Post_8          | -0,10281   | 0,10431   | 0,22073   | 0,10718  |
| 7Networks_RH_DorsAttn_Post_9          | 0,021472   | 0,72434   | -0,11398  | 0,42314  |
| 7Networks_RH_DorsAttn_Post_10         | -0,047737  | 0,44655   | 0,061705  | 0,6305   |
| 7Networks_RH_DorsAttn_FEF_1           | -0,087941  | 0,16012   | 0,08259   | 0,58942  |
| 7Networks_RH_DorsAttn_FEF_2           | 0,059472   | 0,31442   | -0,35923  | 0,03744  |
| 7Networks_RH_DorsAttn_PrCv_1          | -0,023558  | 0,69956   | -0,085148 | 0,56629  |
| 7Networks_RH_SalVentAttn_TempOccPar_1 | -0,0030163 | 0,95955   | 0,24926   | 0,14885  |
| 7Networks_RH_SalVentAttn_TempOccPar_2 | 0,06984    | 0,22222   | -0,10182  | 0,60233  |
| 7Networks_RH_SalVentAttn_TempOccPar_3 | 0,014644   | 0,80411   | 0,12575   | 0,43957  |
| 7Networks_RH_SalVentAttn_PrC_1        | -0,032073  | 0,58046   | -0,17922  | 0,38742  |
| 7Networks_RH_SalVentAttn_FrOper_1     | 0,073802   | 0,21908   | -0,24837  | 0,12224  |
| 7Networks_RH_SalVentAttn_FrOper_2     | 0,033102   | 0,62273   | -0,058355 | 0,63411  |
| 7Networks_RH_SalVentAttn_FrOper_3     | -0,017422  | 0,77187   | 0,16148   | 0,26407  |
| 7Networks_RH_SalVentAttn_FrOper_4     | -0,047879  | 0,42419   | 0,15661   | 0,34801  |

|                                |            |           |           |           |
|--------------------------------|------------|-----------|-----------|-----------|
| 7Networks_RH_SalVentAttn_Med_1 | 0,081997   | 0,17022   | -0,1724   | 0,28292   |
| 7Networks_RH_SalVentAttn_Med_2 | 0,056308   | 0,36997   | 0,0088976 | 0,94468   |
| 7Networks_RH_SalVentAttn_Med_3 | 0,18492    | 0,0028243 | -0,55335  | 0,0004109 |
| 7Networks_RH_Limbic_OFC_1      | 0,000525   | 0,99352   | 0,08355   | 0,53641   |
| 7Networks_RH_Limbic_OFC_2      | 0,016288   | 0,78382   | 0,070742  | 0,59627   |
| 7Networks_RH_Limbic_OFC_3      | 0,093422   | 0,13691   | -0,20322  | 0,13794   |
| 7Networks_RH_Limbic_TempPole_1 | 0,025827   | 0,65655   | 0,061589  | 0,74812   |
| 7Networks_RH_Limbic_TempPole_2 | -0,019268  | 0,75829   | 0,18356   | 0,19993   |
| 7Networks_RH_Limbic_TempPole_3 | 0,074456   | 0,26554   | -0,031963 | 0,78812   |
| 7Networks_RH_Cont_Par_1        | 0,013852   | 0,81185   | -0,084165 | 0,68608   |
| 7Networks_RH_Cont_Par_2        | 0,072785   | 0,21067   | -0,069621 | 0,70206   |
| 7Networks_RH_Cont_Par_3        | 0,050633   | 0,38055   | -0,18529  | 0,402     |
| 7Networks_RH_Cont_Temp_1       | -0,089824  | 0,13905   | 0,35894   | 0,05401   |
| 7Networks_RH_Cont_PFCv_1       | -0,045812  | 0,44105   | 0,19838   | 0,28585   |
| 7Networks_RH_Cont_PFCl_1       | 0,042174   | 0,47755   | 0,045826  | 0,77041   |
| 7Networks_RH_Cont_PFCl_2       | -0,014437  | 0,81156   | 0,032326  | 0,82868   |
| 7Networks_RH_Cont_PFCl_3       | -0,12094   | 0,04088   | 0,13941   | 0,32564   |
| 7Networks_RH_Cont_PFCl_4       | 0,024286   | 0,69911   | -0,059137 | 0,6466    |
| 7Networks_RH_Cont_PFCl_5       | -0,051934  | 0,38582   | -0,069729 | 0,62116   |
| 7Networks_RH_Cont_PFCl_6       | -0,0091309 | 0,87687   | -0,046093 | 0,74684   |
| 7Networks_RH_Cont_PFCl_7       | 0,01624    | 0,79713   | -0,069193 | 0,63339   |
| 7Networks_RH_Cont_pCun_1       | -0,062743  | 0,28735   | 0,17131   | 0,28731   |
| 7Networks_RH_Cont_PFCmp_1      | -0,064961  | 0,30436   | 0,039802  | 0,74008   |
| 7Networks_RH_Cont_PFCmp_2      | 0,048745   | 0,44644   | -0,14787  | 0,25835   |
| 7Networks_RH_Cont_PFCmp_3      | 0,14451    | 0,016821  | -0,48906  | 0,0023123 |
| 7Networks_RH_Cont_PFCmp_4      | 0,046628   | 0,47516   | -0,30197  | 0,019916  |
| 7Networks_RH_Default_Par_1     | 0,095142   | 0,11799   | -0,075421 | 0,66797   |
| 7Networks_RH_Default_Par_2     | 0,044959   | 0,44645   | 0,059015  | 0,74643   |
| 7Networks_RH_Default_Par_3     | -0,026585  | 0,64961   | -0,062762 | 0,73235   |
| 7Networks_RH_Default_Temp_1    | 0,028678   | 0,63731   | -0,12972  | 0,36886   |
| 7Networks_RH_Default_Temp_2    | -0,03071   | 0,61712   | 0,1155    | 0,43617   |
| 7Networks_RH_Default_Temp_3    | -0,052706  | 0,42281   | 0,16048   | 0,23618   |
| 7Networks_RH_Default_Temp_4    | -0,094782  | 0,10756   | 0,28412   | 0,063133  |
| 7Networks_RH_Default_Temp_5    | 0,12176    | 0,047406  | -0,049152 | 0,77162   |
| 7Networks_RH_Default_PFCv_1    | -0,063573  | 0,30782   | 0,015555  | 0,91186   |
| 7Networks_RH_Default_PFCm_1    | 0,087377   | 0,13796   | -0,09607  | 0,52614   |
| 7Networks_RH_Default_PFCm_2    | 0,025903   | 0,66185   | -0,026321 | 0,87224   |
| 7Networks_RH_Default_PFCm_3    | -0,047054  | 0,47151   | 0,0038185 | 0,97947   |
| 7Networks_RH_Default_PFCm_4    | 0,003877   | 0,95457   | -0,13584  | 0,22847   |



|                             |            |           |           |           |
|-----------------------------|------------|-----------|-----------|-----------|
| 7Networks_RH_Default_PFCm_5 | 0,029688   | 0,64304   | -0,33171  | 0,0049967 |
| 7Networks_RH_Default_PFCm_6 | 0,21399    | 0,0003541 | -0,50618  | 0,0005788 |
| 7Networks_RH_Default_PFCm_7 | -0,0080771 | 0,88762   | -0,12891  | 0,49347   |
| 7Networks_RH_Default_PCC_1  | -0,12127   | 0,057177  | 0,22042   | 0,12134   |
| 7Networks_RH_Default_PCC_2  | -0,035063  | 0,5869    | 0,076935  | 0,56602   |
| 7Networks_RH_Default_PCC_3  | 0,082602   | 0,15637   | -0,076839 | 0,64896   |

**Supplementary Table 7. Genetic and environmental correlation between Agreeableness and cortical thickness in HCP.** Genetic correlation between Agreeableness and local cortical thickness calculated using solar 8.4.0. Regions are named according to the Schaefer 200 atlas, based on 7-networks. Here we report environmental correlation ( $\rho_e$ ) and genetic correlation ( $\rho_g$ ) and the associated p-values.

| ROI name               | $\rho_e$   | P       | $\rho_g$   | P        |
|------------------------|------------|---------|------------|----------|
| 7Networks_LH_Vis_1     | -0.077319  | 0.21739 | 0.031867   | 0.76213  |
| 7Networks_LH_Vis_2     | 0.020231   | 0.74679 | -0.021573  | 0.85557  |
| 7Networks_LH_Vis_3     | -0.019318  | 0.74977 | -0.16548   | 0.33899  |
| 7Networks_LH_Vis_4     | 0.030785   | 0.62362 | -0.037492  | 0.68262  |
| 7Networks_LH_Vis_5     | -0.045422  | 0.47837 | -0.0060919 | 0.95433  |
| 7Networks_LH_Vis_6     | 0.0020273  | 0.975   | -0.0084422 | 0.93314  |
| 7Networks_LH_Vis_7     | 0.018961   | 0.77164 | 0.023085   | 0.80733  |
| 7Networks_LH_Vis_8     | 0.061134   | 0.29104 | -0.10968   | 0.40093  |
| 7Networks_LH_Vis_9     | -0.052112  | 0.42324 | 0.086626   | 0.36478  |
| 7Networks_LH_Vis_10    | -0.0001018 | 0.99887 | -0.023673  | 0.7997   |
| 7Networks_LH_Vis_11    | 0.019588   | 0.75194 | 0.11301    | 0.32772  |
| 7Networks_LH_Vis_12    | -0.010871  | 0.87054 | -0.017826  | 0.85943  |
| 7Networks_LH_Vis_13    | 0.051006   | 0.45749 | 0.021795   | 0.813    |
| 7Networks_LH_Vis_14    | 0.097985   | 0.13338 | -0.013031  | 0.89892  |
| 7Networks_LH_SomMot_1  | -0.022766  | 0.72929 | -0.0059826 | 0.95069  |
| 7Networks_LH_SomMot_2  | -0.0047647 | 0.93819 | 0.037657   | 0.76946  |
| 7Networks_LH_SomMot_3  | -0.034172  | 0.60967 | -0.092592  | 0.32895  |
| 7Networks_LH_SomMot_4  | -0.040704  | 0.52632 | -0.047306  | 0.66143  |
| 7Networks_LH_SomMot_5  | -0.09301   | 0.12396 | 0.12071    | 0.36274  |
| 7Networks_LH_SomMot_6  | -0.061314  | 0.35693 | 0.0008657  | 0.99243  |
| 7Networks_LH_SomMot_7  | 0.051566   | 0.41174 | -0.0005182 | 0.99643  |
| 7Networks_LH_SomMot_8  | -0.064761  | 0.30999 | 0.18022    | 0.1665   |
| 7Networks_LH_SomMot_9  | 0.067279   | 0.28354 | -0.14346   | 0.21244  |
| 7Networks_LH_SomMot_10 | -0.0019795 | 0.97631 | -0.1657    | 0.079732 |
| 7Networks_LH_SomMot_11 | 0.045638   | 0.44984 | -0.11944   | 0.39923  |
| 7Networks_LH_SomMot_12 | 0.030527   | 0.62916 | -0.0062447 | 0.95609  |



|                                    |            |               |           |               |
|------------------------------------|------------|---------------|-----------|---------------|
| 7Networks_LH_SomMot_13             | 0.014934   | 0.81601       | -0.019287 | 0.87374       |
| 7Networks_LH_SomMot_14             | -0.062096  | 0.31446       | 0.063622  | 0.56204       |
| 7Networks_LH_SomMot_15             | -0.014165  | 0.82361       | -0.087766 | 0.38355       |
| 7Networks_LH_SomMot_16             | 0.10419    | 0.11947       | -0.13423  | 0.22497       |
| 7Networks_LH_DorsAttn_Post_1       | 0.16223    | 0.009763<br>6 | -0.41593  | 0.000682<br>4 |
| 7Networks_LH_DorsAttn_Post_2       | 0.0079147  | 0.8933        | -0.028017 | 0.8417        |
| 7Networks_LH_DorsAttn_Post_3       | -0.0016595 | 0.97895       | 0.052246  | 0.65202       |
| 7Networks_LH_DorsAttn_Post_4       | 0.018212   | 0.77597       | -0.045804 | 0.69585       |
| 7Networks_LH_DorsAttn_Post_5       | 0.0090312  | 0.88023       | 0.046217  | 0.74586       |
| 7Networks_LH_DorsAttn_Post_6       | -0.050747  | 0.41443       | 0.14445   | 0.31342       |
| 7Networks_LH_DorsAttn_Post_7       | -0.062537  | 0.34788       | 0.061882  | 0.54495       |
| 7Networks_LH_DorsAttn_Post_8       | -0.082318  | 0.18385       | 0.11137   | 0.36049       |
| 7Networks_LH_DorsAttn_Post_9       | -0.033359  | 0.60768       | 0.012096  | 0.90459       |
| 7Networks_LH_DorsAttn_Post_10      | 0.0044846  | 0.94713       | -0.023911 | 0.81669       |
| 7Networks_LH_DorsAttn_FEF_1        | -0.11762   | 0.054424      | 0.27643   | 0.029121      |
| 7Networks_LH_DorsAttn_FEF_2        | 0.037359   | 0.56248       | 0.0037484 | 0.974         |
| 7Networks_LH_DorsAttn_PrCv_1       | -0.0906    | 0.132         | 0.35233   | 0.026929      |
| 7Networks_LH_SalVentAttn_ParOper_1 | -0.082851  | 0.16615       | 0.13334   | 0.47023       |
| 7Networks_LH_SalVentAttn_ParOper_2 | -0.0074933 | 0.90029       | -0.11113  | 0.36781       |
| 7Networks_LH_SalVentAttn_ParOper_3 | -0.0144    | 0.81558       | 0.011076  | 0.93966       |
| 7Networks_LH_SalVentAttn_FrOper_1  | -0.068857  | 0.27057       | -0.045872 | 0.68752       |
| 7Networks_LH_SalVentAttn_FrOper_2  | 0.04249    | 0.5115        | -0.1597   | 0.13611       |
| 7Networks_LH_SalVentAttn_FrOper_3  | 0.07889    | 0.22347       | -0.33271  | 0.001349<br>6 |
| 7Networks_LH_SalVentAttn_FrOper_4  | -0.016992  | 0.78685       | 0.20297   | 0.15611       |
| 7Networks_LH_SalVentAttn_PFC1_1    | -0.03721   | 0.55386       | 0.17134   | 0.079832      |
| 7Networks_LH_SalVentAttn_Med_1     | -0.054133  | 0.40252       | 0.2731    | 0.025194      |
| 7Networks_LH_SalVentAttn_Med_2     | 0.046377   | 0.46887       | -0.01192  | 0.92117       |
| 7Networks_LH_SalVentAttn_Med_3     | 0.1825     | 0.003198<br>6 | -0.12789  | 0.35265       |
| 7Networks_LH_Limbic_OFC_1          | 0.026823   | 0.65874       | 0.063344  | 0.60155       |
| 7Networks_LH_Limbic_OFC_2          | 0.017305   | 0.78904       | -0.016377 | 0.88751       |
| 7Networks_LH_Limbic_TempPole_1     | -0.039704  | 0.53917       | 0.038064  | 0.75364       |
| 7Networks_LH_Limbic_TempPole_2     | -0.058372  | 0.3406        | 0.021006  | 0.8443        |
| 7Networks_LH_Limbic_TempPole_3     | -0.011536  | 0.84501       | -0.11831  | 0.36935       |
| 7Networks_LH_Limbic_TempPole_4     | -0.037723  | 0.56597       | 0.029318  | 0.77513       |
| 7Networks_LH_Cont_Par_1            | -0.027188  | 0.6545        | 0.084068  | 0.56199       |
| 7Networks_LH_Cont_Par_2            | -0.12694   | 0.033798      | 0.16236   | 0.20299       |
| 7Networks_LH_Cont_Par_3            | -0.053117  | 0.35935       | 0.18933   | 0.53464       |

|                             |            |         |           |          |
|-----------------------------|------------|---------|-----------|----------|
| 7Networks_LH_Cont_Temp_1    | 0.055774   | 0.35649 | 0.0015069 | 0.99194  |
| 7Networks_LH_Cont_PFC1_1    | 0.018594   | 0.75069 | 0.023251  | 0.85269  |
| 7Networks_LH_Cont_PFC1_2    | 0.0060743  | 0.92192 | -0.084399 | 0.49749  |
| 7Networks_LH_Cont_PFC1_3    | 0.0021952  | 0.97253 | 0.080574  | 0.45774  |
| 7Networks_LH_Cont_PFC1_4    | -0.09488   | 0.12077 | 0.22866   | 0.070802 |
| 7Networks_LH_Cont_PFC1_5    | -0.001802  | 0.9771  | 0.21568   | 0.035678 |
| 7Networks_LH_Cont_PFC1_6    | -0.043499  | 0.4709  | 0.26095   | 0.075109 |
| 7Networks_LH_Cont_pCun_1    | -0.0087962 | 0.88796 | 0.016218  | 0.88139  |
| 7Networks_LH_Cont_Cing_1    | -0.063993  | 0.35004 | 0.070036  | 0.46001  |
| 7Networks_LH_Cont_Cing_2    | 0.034948   | 0.5915  | -0.13962  | 0.2225   |
| 7Networks_LH_Default_Temp_1 | -0.010139  | 0.87328 | 0.044788  | 0.73194  |
| 7Networks_LH_Default_Temp_2 | 0.098493   | 0.10614 | -0.036615 | 0.77177  |
| 7Networks_LH_Default_Temp_3 | 0.01818    | 0.77103 | -0.095804 | 0.40463  |
| 7Networks_LH_Default_Temp_4 | -0.029639  | 0.62657 | -0.020403 | 0.89475  |
| 7Networks_LH_Default_Temp_5 | -0.091016  | 0.13879 | -0.041834 | 0.77842  |
| 7Networks_LH_Default_Temp_6 | 0.031056   | 0.60835 | -0.099433 | 0.42615  |
| 7Networks_LH_Default_Temp_7 | -0.023026  | 0.71442 | 0.015706  | 0.90017  |
| 7Networks_LH_Default_Temp_8 | -0.082184  | 0.17506 | 0.21425   | 0.12269  |
| 7Networks_LH_Default_Temp_9 | -0.014934  | 0.80074 | 0.03788   | 0.76324  |
| 7Networks_LH_Default_PFC_1  | 0.024343   | 0.69604 | -0.14245  | 0.20001  |
| 7Networks_LH_Default_PFC_2  | -0.056921  | 0.36862 | 0.22041   | 0.091025 |
| 7Networks_LH_Default_PFC_3  | -0.036084  | 0.53982 | -0.1038   | 0.54295  |
| 7Networks_LH_Default_PFC_4  | -0.019404  | 0.76718 | 0.034188  | 0.71211  |
| 7Networks_LH_Default_PFC_5  | -0.10294   | 0.10452 | 0.19727   | 0.10704  |
| 7Networks_LH_Default_PFC_6  | -0.064973  | 0.29716 | 0.15564   | 0.17843  |
| 7Networks_LH_Default_PFC_7  | -0.057612  | 0.38418 | 0.13196   | 0.16699  |
| 7Networks_LH_Default_PFC_8  | 0.043272   | 0.51197 | -0.02326  | 0.83834  |
| 7Networks_LH_Default_PFC_9  | -0.042367  | 0.50986 | 0.043037  | 0.66124  |
| 7Networks_LH_Default_PFC_10 | 0.0052061  | 0.93367 | 0.04063   | 0.7078   |
| 7Networks_LH_Default_PFC_11 | 0.0036174  | 0.9536  | 0.18172   | 0.069187 |
| 7Networks_LH_Default_PFC_12 | -0.0028771 | 0.96396 | 0.012089  | 0.90156  |
| 7Networks_LH_Default_PFC_13 | -0.056134  | 0.38584 | 0.09851   | 0.31969  |
| 7Networks_LH_Default_PCC_1  | -0.055093  | 0.3967  | 0.060109  | 0.58533  |
| 7Networks_LH_Default_PCC_2  | -0.030578  | 0.61521 | 0.078073  | 0.53121  |
| 7Networks_LH_Default_PCC_3  | -0.037161  | 0.56301 | 0.037023  | 0.73463  |
| 7Networks_LH_Default_PCC_4  | -0.010899  | 0.8678  | -0.046364 | 0.67889  |
| 7Networks_LH_Default_PHC_1  | -0.08159   | 0.22444 | 0.073602  | 0.48017  |
| 7Networks_RH_Vis_1          | 0.057201   | 0.36663 | -0.10737  | 0.33181  |
| 7Networks_RH_Vis_2          | -0.033924  | 0.5973  | 0.038809  | 0.74153  |

|                              |           |          |            |               |
|------------------------------|-----------|----------|------------|---------------|
| 7Networks_RH_Vis_3           | 0.046263  | 0.47867  | -0.11764   | 0.30064       |
| 7Networks_RH_Vis_4           | -0.16016  | 0.018567 | 0.13707    | 0.10772       |
| 7Networks_RH_Vis_5           | 0.058668  | 0.3427   | -0.1222    | 0.32994       |
| 7Networks_RH_Vis_6           | 0.014021  | 0.83055  | -0.068484  | 0.49273       |
| 7Networks_RH_Vis_7           | -0.022471 | 0.73405  | 0.025383   | 0.78663       |
| 7Networks_RH_Vis_8           | -0.037437 | 0.57282  | -0.022487  | 0.83179       |
| 7Networks_RH_Vis_9           | -0.047876 | 0.48225  | 0.092151   | 0.29541       |
| 7Networks_RH_Vis_10          | 0.016975  | 0.80232  | -0.042458  | 0.67763       |
| 7Networks_RH_Vis_11          | 0.054493  | 0.35708  | -0.067285  | 0.61478       |
| 7Networks_RH_Vis_12          | 0.014776  | 0.82598  | 0.010443   | 0.91209       |
| 7Networks_RH_Vis_13          | -0.031754 | 0.62904  | -0.031339  | 0.74954       |
| 7Networks_RH_Vis_14          | 0.012977  | 0.8418   | -0.14005   | 0.17876       |
| 7Networks_RH_Vis_15          | 0.026938  | 0.66212  | -0.068086  | 0.59664       |
| 7Networks_RH_SomMot_1        | 0.037501  | 0.56873  | -0.086867  | 0.40558       |
| 7Networks_RH_SomMot_2        | 0.030815  | 0.63649  | -0.044098  | 0.71403       |
| 7Networks_RH_SomMot_3        | 0.11773   | 0.066815 | -0.28746   | 0.014132      |
| 7Networks_RH_SomMot_4        | 0.017257  | 0.78505  | -0.020402  | 0.86196       |
| 7Networks_RH_SomMot_5        | -0.04032  | 0.5074   | -0.0014048 | 0.99269       |
| 7Networks_RH_SomMot_6        | 0.045523  | 0.46724  | -0.11774   | 0.35075       |
| 7Networks_RH_SomMot_7        | -0.06929  | 0.27877  | -0.08431   | 0.40853       |
| 7Networks_RH_SomMot_8        | 0.031813  | 0.5918   | 0.034054   | 0.82033       |
| 7Networks_RH_SomMot_9        | 0.027008  | 0.68193  | -0.038093  | 0.75679       |
| 7Networks_RH_SomMot_10       | 0.040142  | 0.51509  | -0.007268  | 0.96512       |
| 7Networks_RH_SomMot_11       | 0.04506   | 0.45817  | 0.11781    | 0.32939       |
| 7Networks_RH_SomMot_12       | 0.0006033 | 0.99252  | -0.11943   | 0.23107       |
| 7Networks_RH_SomMot_13       | 0.01692   | 0.78108  | -0.022586  | 0.84963       |
| 7Networks_RH_SomMot_14       | 0.12475   | 0.048685 | -0.14817   | 0.17146       |
| 7Networks_RH_SomMot_15       | 0.015389  | 0.81403  | 0.025695   | 0.83007       |
| 7Networks_RH_SomMot_16       | 0.017261  | 0.78542  | 0.060817   | 0.64336       |
| 7Networks_RH_SomMot_17       | 0.063942  | 0.3294   | -0.26003   | 0.008162<br>4 |
| 7Networks_RH_SomMot_18       | 0.06379   | 0.30556  | -0.078342  | 0.46215       |
| 7Networks_RH_SomMot_19       | -0.012906 | 0.84477  | -0.049674  | 0.63496       |
| 7Networks_RH_DorsAttn_Post_1 | -0.028847 | 0.63632  | -0.014462  | 0.91569       |
| 7Networks_RH_DorsAttn_Post_2 | 0.065433  | 0.28324  | -0.29619   | 0.02782       |
| 7Networks_RH_DorsAttn_Post_3 | 0.069326  | 0.25789  | -0.14135   | 0.23337       |
| 7Networks_RH_DorsAttn_Post_4 | 0.10875   | 0.074748 | -0.21554   | 0.13004       |
| 7Networks_RH_DorsAttn_Post_5 | 0.021496  | 0.72454  | -0.025668  | 0.86743       |
| 7Networks_RH_DorsAttn_Post_6 | -0.013621 | 0.83005  | 0.0036559  | 0.97039       |

|                                       |            |          |            |          |
|---------------------------------------|------------|----------|------------|----------|
| 7Networks_RH_DorsAttn_Post_7          | 0.012981   | 0.82677  | -0.037657  | 0.82965  |
| 7Networks_RH_DorsAttn_Post_8          | -0.0084823 | 0.8934   | 0.038211   | 0.73724  |
| 7Networks_RH_DorsAttn_Post_9          | -0.038642  | 0.53678  | 0.03108    | 0.78929  |
| 7Networks_RH_DorsAttn_Post_10         | 0.06167    | 0.33431  | -0.043208  | 0.67943  |
| 7Networks_RH_DorsAttn_FEF_1           | 0.05782    | 0.36785  | -0.049904  | 0.69078  |
| 7Networks_RH_DorsAttn_FEF_2           | 0.064173   | 0.28964  | -0.13362   | 0.33989  |
| 7Networks_RH_DorsAttn_PrCv_1          | -0.012223  | 0.84537  | 0.065481   | 0.58746  |
| 7Networks_RH_SalVentAttn_TempOccPar_1 | 0.034713   | 0.56938  | -0.22452   | 0.11504  |
| 7Networks_RH_SalVentAttn_TempOccPar_2 | 0.0035157  | 0.95216  | 0.044896   | 0.77571  |
| 7Networks_RH_SalVentAttn_TempOccPar_3 | 0.0049294  | 0.93459  | -0.11048   | 0.40572  |
| 7Networks_RH_SalVentAttn_PrC_1        | -0.027791  | 0.64229  | 0.11681    | 0.49596  |
| 7Networks_RH_SalVentAttn_FrOper_1     | -0.001387  | 0.98184  | 0.011737   | 0.92829  |
| 7Networks_RH_SalVentAttn_FrOper_2     | 0.063812   | 0.35037  | -0.020277  | 0.83769  |
| 7Networks_RH_SalVentAttn_FrOper_3     | -0.0069686 | 0.90936  | -0.026862  | 0.81893  |
| 7Networks_RH_SalVentAttn_FrOper_4     | -0.015541  | 0.80051  | -0.16973   | 0.20346  |
| 7Networks_RH_SalVentAttn_Med_1        | -0.05008   | 0.41361  | 0.1985     | 0.12697  |
| 7Networks_RH_SalVentAttn_Med_2        | -0.0030423 | 0.96217  | 0.055779   | 0.59487  |
| 7Networks_RH_SalVentAttn_Med_3        | 0.029224   | 0.65494  | 0.0013009  | 0.99141  |
| 7Networks_RH_Limbic_OFC_1             | -0.046644  | 0.48393  | 0.14545    | 0.18315  |
| 7Networks_RH_Limbic_OFC_2             | 0.041184   | 0.49742  | -0.012827  | 0.90721  |
| 7Networks_RH_Limbic_OFC_3             | 0.058736   | 0.35898  | -0.0058573 | 0.95804  |
| 7Networks_RH_Limbic_TempPole_1        | 0.020697   | 0.72865  | -0.16974   | 0.27194  |
| 7Networks_RH_Limbic_TempPole_2        | -0.039484  | 0.53512  | 0.021472   | 0.85333  |
| 7Networks_RH_Limbic_TempPole_3        | -0.064371  | 0.33849  | 0.05844    | 0.54706  |
| 7Networks_RH_Cont_Par_1               | 0.0052287  | 0.93065  | 0.018464   | 0.91404  |
| 7Networks_RH_Cont_Par_2               | 0.11953    | 0.044264 | -0.107     | 0.47125  |
| 7Networks_RH_Cont_Par_3               | -0.0095611 | 0.87139  | 0.027634   | 0.87846  |
| 7Networks_RH_Cont_Temp_1              | -0.0224    | 0.71882  | 0.26487    | 0.072585 |
| 7Networks_RH_Cont_PFCv_1              | 0.025652   | 0.67507  | -0.034168  | 0.81645  |
| 7Networks_RH_Cont_PFCI_1              | 0.10067    | 0.095965 | -0.048468  | 0.70801  |
| 7Networks_RH_Cont_PFCI_2              | 0.045089   | 0.46641  | -0.053835  | 0.65743  |
| 7Networks_RH_Cont_PFCI_3              | 0.0065973  | 0.91339  | 0.033812   | 0.76753  |
| 7Networks_RH_Cont_PFCI_4              | 0.05794    | 0.36176  | 0.13494    | 0.19301  |
| 7Networks_RH_Cont_PFCI_5              | -0.018524  | 0.76053  | 0.072774   | 0.52668  |
| 7Networks_RH_Cont_PFCI_6              | 0.037125   | 0.5393   | -0.12707   | 0.2743   |
| 7Networks_RH_Cont_PFCI_7              | 0.037633   | 0.5587   | 0.11287    | 0.33879  |
| 7Networks_RH_Cont_pCun_1              | -0.060723  | 0.31192  | 0.21667    | 0.095314 |

|                             |            |               |           |          |
|-----------------------------|------------|---------------|-----------|----------|
| 7Networks_RH_Cont_PFCmp_1   | -0.034261  | 0.59357       | 0.098281  | 0.31428  |
| 7Networks_RH_Cont_PFCmp_2   | 0.0073659  | 0.91043       | -0.072901 | 0.49474  |
| 7Networks_RH_Cont_PFCmp_3   | 0.032848   | 0.59758       | -0.109    | 0.40345  |
| 7Networks_RH_Cont_PFCmp_4   | -0.0082365 | 0.9027        | 0.049384  | 0.63757  |
| 7Networks_RH_Default_Par_1  | 0.04386    | 0.47892       | -0.1613   | 0.26073  |
| 7Networks_RH_Default_Par_2  | 0.10623    | 0.077322      | -0.16732  | 0.2688   |
| 7Networks_RH_Default_Par_3  | 0.017001   | 0.77731       | -0.043425 | 0.7711   |
| 7Networks_RH_Default_Temp_1 | -0.057436  | 0.35624       | -0.030608 | 0.79545  |
| 7Networks_RH_Default_Temp_2 | -0.019443  | 0.75644       | 0.013218  | 0.91278  |
| 7Networks_RH_Default_Temp_3 | 0.086733   | 0.19513       | -0.084617 | 0.43547  |
| 7Networks_RH_Default_Temp_4 | -0.041545  | 0.49468       | -0.10176  | 0.40342  |
| 7Networks_RH_Default_Temp_5 | 0.04861    | 0.44075       | -0.27408  | 0.048471 |
| 7Networks_RH_Default_PFCv_1 | -0.083913  | 0.19125       | 0.12837   | 0.255    |
| 7Networks_RH_Default_PFCm_1 | -0.054706  | 0.36494       | 0.27425   | 0.02385  |
| 7Networks_RH_Default_PFCm_2 | 0.058903   | 0.32953       | 0.11629   | 0.38274  |
| 7Networks_RH_Default_PFCm_3 | 0.02927    | 0.65944       | -0.077827 | 0.51683  |
| 7Networks_RH_Default_PFCm_4 | -0.017048  | 0.80289       | 0.058069  | 0.52556  |
| 7Networks_RH_Default_PFCm_5 | 0.064147   | 0.3257        | -0.019145 | 0.84249  |
| 7Networks_RH_Default_PFCm_6 | 0.18828    | 0.002159<br>5 | -0.046963 | 0.69211  |
| 7Networks_RH_Default_PFCm_7 | 0.030791   | 0.59863       | 0.02853   | 0.85299  |
| 7Networks_RH_Default_PCC_1  | 0.0070305  | 0.91539       | -0.092366 | 0.4163   |
| 7Networks_RH_Default_PCC_2  | -0.084853  | 0.19643       | 0.15324   | 0.15821  |
| 7Networks_RH_Default_PCC_3  | 0.053687   | 0.36939       | 0.045433  | 0.74041  |

**Supplementary Table 8. Genetic and environmental correlation between Conscientiousness and cortical thickness in HCP.** Genetic correlation between Conscientiousness and local cortical thickness calculated using solar 8.4.0. Regions are named according to the Schaefer 200 atlas, based on 7-networks. Here we report environmental correlation ( $\rho_e$ ) and genetic correlation ( $\rho_g$ ) and the associated p-values.

| ROI name           | $\rho_e$  | <b>P</b> | $\rho_g$ | <b>P</b> |
|--------------------|-----------|----------|----------|----------|
| 7Networks_LH_Vis_1 | -0.064948 | 0.28488  | 0.1025   | 0.31847  |
| 7Networks_LH_Vis_2 | -0.02984  | 0.62517  | 0.019301 | 0.86777  |
| 7Networks_LH_Vis_3 | -0.04565  | 0.44006  | 0.11881  | 0.479    |
| 7Networks_LH_Vis_4 | -0.054817 | 0.36709  | 0.062505 | 0.48675  |
| 7Networks_LH_Vis_5 | -0.066132 | 0.28586  | 0.049089 | 0.63462  |
| 7Networks_LH_Vis_6 | 0.030085  | 0.63056  | -0.10719 | 0.27071  |
| 7Networks_LH_Vis_7 | 0.10483   | 0.095888 | -0.17563 | 0.054484 |
| 7Networks_LH_Vis_8 | -0.037894 | 0.50597  | 0.11199  | 0.37415  |
| 7Networks_LH_Vis_9 | 0.02718   | 0.66247  | 0.048604 | 0.60027  |

|                                    |            |          |            |          |
|------------------------------------|------------|----------|------------|----------|
| 7Networks_LH_Vis_10                | 0.006716   | 0.91632  | -0.039026  | 0.66474  |
| 7Networks_LH_Vis_11                | 0.011557   | 0.84615  | 0.11806    | 0.28916  |
| 7Networks_LH_Vis_12                | 0.038152   | 0.55275  | 0.056155   | 0.56363  |
| 7Networks_LH_Vis_13                | 0.03894    | 0.55583  | 0.083177   | 0.35067  |
| 7Networks_LH_Vis_14                | -0.0097543 | 0.87756  | 0.040093   | 0.68631  |
| 7Networks_LH_SomMot_1              | -0.057818  | 0.36342  | -0.012428  | 0.89643  |
| 7Networks_LH_SomMot_2              | 0.022158   | 0.71025  | 0.0030509  | 0.9803   |
| 7Networks_LH_SomMot_3              | 0.013214   | 0.83743  | -0.075175  | 0.41197  |
| 7Networks_LH_SomMot_4              | -0.038026  | 0.54074  | -0.052692  | 0.61323  |
| 7Networks_LH_SomMot_5              | -0.042224  | 0.47148  | -0.011526  | 0.92927  |
| 7Networks_LH_SomMot_6              | -0.023461  | 0.71585  | 0.054897   | 0.53905  |
| 7Networks_LH_SomMot_7              | 0.022402   | 0.7139   | -0.11424   | 0.35455  |
| 7Networks_LH_SomMot_8              | -0.015646  | 0.79978  | 0.16104    | 0.20094  |
| 7Networks_LH_SomMot_9              | 0.021912   | 0.71896  | 0.044365   | 0.69357  |
| 7Networks_LH_SomMot_10             | 0.040408   | 0.5338   | 0.0018957  | 0.98346  |
| 7Networks_LH_SomMot_11             | -0.031879  | 0.5857   | 0.17057    | 0.21643  |
| 7Networks_LH_SomMot_12             | 0.02527    | 0.68136  | -0.046722  | 0.67003  |
| 7Networks_LH_SomMot_13             | -0.046903  | 0.4495   | 0.14179    | 0.23077  |
| 7Networks_LH_SomMot_14             | 0.024183   | 0.68735  | -0.055121  | 0.60424  |
| 7Networks_LH_SomMot_15             | -0.034015  | 0.58054  | 0.051024   | 0.60102  |
| 7Networks_LH_SomMot_16             | 0.059599   | 0.35429  | 0.0059328  | 0.95628  |
| 7Networks_LH_DorsAttn_Post_1       | 0.012847   | 0.83681  | 0.0024396  | 0.98349  |
| 7Networks_LH_DorsAttn_Post_2       | -0.082169  | 0.15444  | 0.21064    | 0.12309  |
| 7Networks_LH_DorsAttn_Post_3       | -0.13785   | 0.026164 | 0.18714    | 0.089026 |
| 7Networks_LH_DorsAttn_Post_4       | 0.089721   | 0.14692  | -0.079131  | 0.48982  |
| 7Networks_LH_DorsAttn_Post_5       | -0.020779  | 0.72154  | 0.14512    | 0.29471  |
| 7Networks_LH_DorsAttn_Post_6       | 0.048387   | 0.42126  | -0.067583  | 0.62783  |
| 7Networks_LH_DorsAttn_Post_7       | -0.062047  | 0.33429  | 0.061672   | 0.53802  |
| 7Networks_LH_DorsAttn_Post_8       | -0.016782  | 0.78155  | 0.18563    | 0.115    |
| 7Networks_LH_DorsAttn_Post_9       | -0.018915  | 0.76367  | -0.012598  | 0.89756  |
| 7Networks_LH_DorsAttn_Post_10      | 0.031742   | 0.62404  | -0.0054248 | 0.95587  |
| 7Networks_LH_DorsAttn_FEF_1        | 0.0012074  | 0.98385  | -0.03539   | 0.77955  |
| 7Networks_LH_DorsAttn_FEF_2        | 0.051657   | 0.40508  | -0.23482   | 0.035912 |
| 7Networks_LH_DorsAttn_PrCv_1       | 0.071308   | 0.22766  | 0.057345   | 0.70572  |
| 7Networks_LH_SalVentAttn_ParOper_1 | -0.048551  | 0.40677  | 0.44971    | 0.011622 |
| 7Networks_LH_SalVentAttn_ParOper_2 | 0.011054   | 0.85074  | 0.07777    | 0.51737  |
| 7Networks_LH_SalVentAttn_ParOper_3 | 0.035949   | 0.5466   | -0.22066   | 0.1244   |
| 7Networks_LH_SalVentAttn_FrOper_1  | 0.027079   | 0.65782  | -0.13815   | 0.20704  |



|                                   |           |           |           |          |
|-----------------------------------|-----------|-----------|-----------|----------|
| 7Networks_LH_SalVentAttn_FrOper_2 | 0.0060741 | 0.92349   | -0.068191 | 0.51249  |
| 7Networks_LH_SalVentAttn_FrOper_3 | 0.082737  | 0.18921   | -0.15307  | 0.13103  |
| 7Networks_LH_SalVentAttn_FrOper_4 | -0.05578  | 0.36937   | 0.22878   | 0.087082 |
| 7Networks_LH_SalVentAttn_PFC1_1   | 0.036465  | 0.55057   | -0.080429 | 0.40039  |
| 7Networks_LH_SalVentAttn_Med_1    | 0.06556   | 0.29499   | 0.039304  | 0.73709  |
| 7Networks_LH_SalVentAttn_Med_2    | -0.029269 | 0.63817   | 0.20471   | 0.076651 |
| 7Networks_LH_SalVentAttn_Med_3    | 0.18241   | 0.0023486 | -0.18904  | 0.15321  |
| 7Networks_LH_Limbic_OFC_1         | 0.016641  | 0.7784    | -0.057306 | 0.62549  |
| 7Networks_LH_Limbic_OFC_2         | 0.020569  | 0.73956   | -0.066454 | 0.54852  |
| 7Networks_LH_Limbic_TempPole_1    | -0.020167 | 0.7478    | -0.049579 | 0.67028  |
| 7Networks_LH_Limbic_TempPole_2    | -0.068709 | 0.2488    | 0.12783   | 0.21985  |
| 7Networks_LH_Limbic_TempPole_3    | 0.035139  | 0.54352   | -0.24495  | 0.051972 |
| 7Networks_LH_Limbic_TempPole_4    | -0.08702  | 0.17095   | 0.001956  | 0.98381  |
| 7Networks_LH_Cont_Par_1           | -0.049678 | 0.40022   | 0.20071   | 0.15089  |
| 7Networks_LH_Cont_Par_2           | 0.007694  | 0.8956    | 0.22045   | 0.071016 |
| 7Networks_LH_Cont_Par_3           | 0.07245   | 0.203     | -0.19127  | 0.51629  |
| 7Networks_LH_Cont_Temp_1          | -0.049154 | 0.40271   | 0.27491   | 0.063131 |
| 7Networks_LH_Cont_PFC1_1          | -0.046553 | 0.41537   | 0.09774   | 0.42352  |
| 7Networks_LH_Cont_PFC1_2          | -0.010549 | 0.86113   | -0.016505 | 0.89088  |
| 7Networks_LH_Cont_PFC1_3          | 0.042447  | 0.49671   | -0.17574  | 0.092612 |
| 7Networks_LH_Cont_PFC1_4          | -0.028096 | 0.63689   | -0.043983 | 0.72709  |
| 7Networks_LH_Cont_PFC1_5          | 0.0063653 | 0.9169    | -0.095556 | 0.34152  |
| 7Networks_LH_Cont_PFC1_6          | 0.014141  | 0.81043   | -0.19224  | 0.1834   |
| 7Networks_LH_Cont_pCun_1          | -0.066858 | 0.26904   | 0.092518  | 0.38309  |
| 7Networks_LH_Cont_Cing_1          | -0.11147  | 0.091664  | 0.077725  | 0.39249  |
| 7Networks_LH_Cont_Cing_2          | 0.086283  | 0.16925   | -0.13526  | 0.22553  |
| 7Networks_LH_Default_Temp_1       | -0.04993  | 0.41833   | 0.086754  | 0.49008  |
| 7Networks_LH_Default_Temp_2       | -0.015926 | 0.78895   | 0.023261  | 0.84843  |
| 7Networks_LH_Default_Temp_3       | -0.04147  | 0.49615   | 0.023729  | 0.83154  |
| 7Networks_LH_Default_Temp_4       | 0.012872  | 0.82815   | 0.013016  | 0.93042  |
| 7Networks_LH_Default_Temp_5       | -0.12892  | 0.030379  | 0.19183   | 0.18859  |
| 7Networks_LH_Default_Temp_6       | 0.058995  | 0.3182    | 0.028938  | 0.81058  |
| 7Networks_LH_Default_Temp_7       | -0.034855 | 0.57043   | 0.038947  | 0.74722  |
| 7Networks_LH_Default_Temp_8       | -0.055349 | 0.34985   | 0.1208    | 0.35757  |
| 7Networks_LH_Default_Temp_9       | -0.11427  | 0.047385  | 0.4982    | 5.21e-05 |
| 7Networks_LH_Default_PFC_1        | 0.015253  | 0.80163   | 0.023044  | 0.83034  |
| 7Networks_LH_Default_PFC_2        | 0.14183   | 0.019705  | -0.07732  | 0.54361  |
| 7Networks_LH_Default_PFC_3        | -0.029937 | 0.60228   | -0.077713 | 0.63792  |
| 7Networks_LH_Default_PFC_4        | 0.018597  | 0.76949   | -0.063143 | 0.48475  |



|                             |            |          |           |          |
|-----------------------------|------------|----------|-----------|----------|
| 7Networks_LH_Default_PFC_5  | 0.0052145  | 0.93273  | -0.072579 | 0.54359  |
| 7Networks_LH_Default_PFC_6  | -0.038198  | 0.52674  | 0.035423  | 0.75324  |
| 7Networks_LH_Default_PFC_7  | 0.008005   | 0.9011   | -0.081125 | 0.38503  |
| 7Networks_LH_Default_PFC_8  | -0.04726   | 0.45704  | 0.01941   | 0.85888  |
| 7Networks_LH_Default_PFC_9  | 0.0006621  | 0.99141  | -0.084682 | 0.36825  |
| 7Networks_LH_Default_PFC_10 | 0.034605   | 0.56842  | -0.033061 | 0.7549   |
| 7Networks_LH_Default_PFC_11 | -0.0053709 | 0.92953  | -0.080094 | 0.41108  |
| 7Networks_LH_Default_PFC_12 | 0.023434   | 0.70878  | -0.1089   | 0.25206  |
| 7Networks_LH_Default_PFC_13 | 0.030111   | 0.63253  | -0.068264 | 0.47474  |
| 7Networks_LH_Default_PCC_1  | -0.067327  | 0.29068  | 0.14357   | 0.17746  |
| 7Networks_LH_Default_PCC_2  | 0.020287   | 0.73103  | 0.083937  | 0.48916  |
| 7Networks_LH_Default_PCC_3  | -0.057912  | 0.3506   | 0.055444  | 0.60229  |
| 7Networks_LH_Default_PCC_4  | -0.067292  | 0.28639  | 0.084173  | 0.43057  |
| 7Networks_LH_Default_PHC_1  | 0.023201   | 0.7205   | -0.022727 | 0.81902  |
| 7Networks_RH_Vis_1          | 0.025792   | 0.67275  | 0.11076   | 0.30486  |
| 7Networks_RH_Vis_2          | -0.037932  | 0.54234  | 0.017212  | 0.87986  |
| 7Networks_RH_Vis_3          | -0.069689  | 0.26834  | 0.02386   | 0.82949  |
| 7Networks_RH_Vis_4          | -0.078664  | 0.22617  | 0.065232  | 0.43832  |
| 7Networks_RH_Vis_5          | -0.032746  | 0.58188  | 0.14489   | 0.23971  |
| 7Networks_RH_Vis_6          | 0.060811   | 0.33681  | -0.089479 | 0.35169  |
| 7Networks_RH_Vis_7          | 0.040591   | 0.52061  | -0.10804  | 0.23124  |
| 7Networks_RH_Vis_8          | -0.077806  | 0.22347  | 0.081951  | 0.41943  |
| 7Networks_RH_Vis_9          | -0.12498   | 0.058197 | 0.046815  | 0.58067  |
| 7Networks_RH_Vis_10         | 0.012055   | 0.85353  | 0.027264  | 0.7814   |
| 7Networks_RH_Vis_11         | -0.030673  | 0.59609  | 0.029942  | 0.8172   |
| 7Networks_RH_Vis_12         | -0.063738  | 0.32387  | 0.10698   | 0.24239  |
| 7Networks_RH_Vis_13         | 0.0042855  | 0.94602  | 0.050114  | 0.59646  |
| 7Networks_RH_Vis_14         | -0.10908   | 0.083476 | 0.075251  | 0.45205  |
| 7Networks_RH_Vis_15         | 0.01894    | 0.75207  | -0.003272 | 0.97901  |
| 7Networks_RH_SomMot_1       | 0.0060077  | 0.92545  | -0.037959 | 0.7088   |
| 7Networks_RH_SomMot_2       | 0.0003322  | 0.99578  | -0.017854 | 0.87804  |
| 7Networks_RH_SomMot_3       | 0.073656   | 0.23798  | -0.12889  | 0.25554  |
| 7Networks_RH_SomMot_4       | -0.10396   | 0.091408 | 0.16114   | 0.15342  |
| 7Networks_RH_SomMot_5       | -0.099081  | 0.094896 | 0.30489   | 0.039043 |
| 7Networks_RH_SomMot_6       | 0.03068    | 0.61525  | -0.1115   | 0.36072  |
| 7Networks_RH_SomMot_7       | -0.02715   | 0.6621   | 0.11586   | 0.23764  |
| 7Networks_RH_SomMot_8       | 0.03211    | 0.57914  | 0.014912  | 0.91834  |
| 7Networks_RH_SomMot_9       | 0.14682    | 0.019982 | -0.15484  | 0.19432  |
| 7Networks_RH_SomMot_10      | 0.12265    | 0.040929 | -0.22477  | 0.15868  |

|                                       |           |          |           |          |
|---------------------------------------|-----------|----------|-----------|----------|
| 7Networks_RH_SomMot_11                | 0.11928   | 0.044933 | -0.13389  | 0.2486   |
| 7Networks_RH_SomMot_12                | 0.033194  | 0.60135  | -0.042358 | 0.66231  |
| 7Networks_RH_SomMot_13                | -0.033354 | 0.57265  | 0.151     | 0.19275  |
| 7Networks_RH_SomMot_14                | -0.013894 | 0.82124  | -0.10084  | 0.33701  |
| 7Networks_RH_SomMot_15                | -0.033134 | 0.59847  | 0.13934   | 0.22787  |
| 7Networks_RH_SomMot_16                | 0.049156  | 0.42372  | -0.16076  | 0.20616  |
| 7Networks_RH_SomMot_17                | -0.013447 | 0.83426  | -0.043259 | 0.6478   |
| 7Networks_RH_SomMot_18                | -0.011777 | 0.84464  | 0.029374  | 0.7772   |
| 7Networks_RH_SomMot_19                | -0.073228 | 0.24941  | 0.078787  | 0.43681  |
| 7Networks_RH_DorsAttn_Post_1          | -0.040541 | 0.4945   | 0.07579   | 0.56922  |
| 7Networks_RH_DorsAttn_Post_2          | 0.010981  | 0.85371  | 0.031156  | 0.81417  |
| 7Networks_RH_DorsAttn_Post_3          | 0.018623  | 0.75483  | -0.0139   | 0.90487  |
| 7Networks_RH_DorsAttn_Post_4          | 0.10217   | 0.085061 | -0.10224  | 0.46516  |
| 7Networks_RH_DorsAttn_Post_5          | 0.07109   | 0.23011  | 0.17888   | 0.23056  |
| 7Networks_RH_DorsAttn_Post_6          | -0.037489 | 0.54228  | 0.0077089 | 0.94115  |
| 7Networks_RH_DorsAttn_Post_7          | 0.094227  | 0.1044   | -0.06988  | 0.67998  |
| 7Networks_RH_DorsAttn_Post_8          | -0.055313 | 0.36767  | 0.10858   | 0.32297  |
| 7Networks_RH_DorsAttn_Post_9          | -0.11172  | 0.06457  | 0.097959  | 0.3821   |
| 7Networks_RH_DorsAttn_Post_10         | 0.0065193 | 0.91602  | 0.066388  | 0.51352  |
| 7Networks_RH_DorsAttn_FEF_1           | 0.057465  | 0.35332  | -0.016993 | 0.88894  |
| 7Networks_RH_DorsAttn_FEF_2           | 0.079956  | 0.17606  | -0.16492  | 0.2391   |
| 7Networks_RH_DorsAttn_PrCv_1          | 0.034624  | 0.57171  | 0.033622  | 0.7768   |
| 7Networks_RH_SalVentAttn_TempOccPar_1 | -0.055551 | 0.3496   | 0.13085   | 0.33651  |
| 7Networks_RH_SalVentAttn_TempOccPar_2 | -0.034108 | 0.55298  | 0.21391   | 0.15619  |
| 7Networks_RH_SalVentAttn_TempOccPar_3 | -0.014745 | 0.80389  | 0.066698  | 0.60599  |
| 7Networks_RH_SalVentAttn_PrC_1        | 0.034203  | 0.5573   | -0.14436  | 0.38077  |
| 7Networks_RH_SalVentAttn_FrOper_1     | -0.10899  | 0.070204 | 0.024027  | 0.85036  |
| 7Networks_RH_SalVentAttn_FrOper_2     | 0.11162   | 0.090163 | -0.039414 | 0.67997  |
| 7Networks_RH_SalVentAttn_FrOper_3     | -0.10961  | 0.063444 | 0.22582   | 0.048594 |
| 7Networks_RH_SalVentAttn_FrOper_4     | -0.038408 | 0.52142  | 0.016602  | 0.89945  |
| 7Networks_RH_SalVentAttn_Med_1        | 0.008653  | 0.88464  | -0.012837 | 0.91935  |
| 7Networks_RH_SalVentAttn_Med_2        | 0.030873  | 0.61957  | 0.028197  | 0.78219  |
| 7Networks_RH_SalVentAttn_Med_3        | 0.1234    | 0.048592 | -0.1865   | 0.1132   |
| 7Networks_RH_Limbic_OFC_1             | 0.055683  | 0.38469  | -0.059048 | 0.5804   |
| 7Networks_RH_Limbic_OFC_2             | 0.097447  | 0.097481 | -0.052069 | 0.6227   |
| 7Networks_RH_Limbic_OFC_3             | 0.025041  | 0.68725  | -0.11927  | 0.27572  |
| 7Networks_RH_Limbic_TempPole_1        | -0.014221 | 0.80784  | -0.13906  | 0.35545  |
| 7Networks_RH_Limbic_TempPole_2        | -0.065724 | 0.28728  | 0.16808   | 0.13421  |
| 7Networks_RH_Limbic_TempPole_3        | 0.020005  | 0.75813  | 0.064125  | 0.49351  |

|                             |            |          |           |           |
|-----------------------------|------------|----------|-----------|-----------|
| 7Networks_RH_Cont_Par_1     | -0.0085431 | 0.88421  | 0.040877  | 0.80632   |
| 7Networks_RH_Cont_Par_2     | 0.056387   | 0.33171  | -0.064617 | 0.65577   |
| 7Networks_RH_Cont_Par_3     | 0.050984   | 0.37838  | -0.025144 | 0.88575   |
| 7Networks_RH_Cont_Temp_1    | -0.019349  | 0.74772  | 0.30613   | 0.033051  |
| 7Networks_RH_Cont_PFCv_1    | 0.10628    | 0.072742 | -0.12425  | 0.3811    |
| 7Networks_RH_Cont_PFCl_1    | 0.031837   | 0.5907   | 0.038827  | 0.75487   |
| 7Networks_RH_Cont_PFCl_2    | 0.051712   | 0.39068  | -0.14617  | 0.21597   |
| 7Networks_RH_Cont_PFCl_3    | -0.015155  | 0.79744  | 0.01252   | 0.91023   |
| 7Networks_RH_Cont_PFCl_4    | 0.10506    | 0.087014 | -0.11848  | 0.24684   |
| 7Networks_RH_Cont_PFCl_5    | 0.001159   | 0.98441  | -0.10959  | 0.32553   |
| 7Networks_RH_Cont_PFCl_6    | -0.042857  | 0.46401  | -0.052324 | 0.64359   |
| 7Networks_RH_Cont_PFCl_7    | 0.061375   | 0.32877  | -0.000357 | 0.99748   |
| 7Networks_RH_Cont_pCun_1    | -0.026653  | 0.65047  | 0.11823   | 0.35632   |
| 7Networks_RH_Cont_PFCmp_1   | -0.022101  | 0.72204  | -0.052293 | 0.57996   |
| 7Networks_RH_Cont_PFCmp_2   | 0.054398   | 0.38748  | -0.079633 | 0.44224   |
| 7Networks_RH_Cont_PFCmp_3   | 0.13632    | 0.022917 | -0.35277  | 0.0055624 |
| 7Networks_RH_Cont_PFCmp_4   | 0.015009   | 0.81673  | -0.08206  | 0.41685   |
| 7Networks_RH_Default_Par_1  | 0.096409   | 0.11484  | -0.1736   | 0.20686   |
| 7Networks_RH_Default_Par_2  | 0.051848   | 0.37915  | 0.035998  | 0.80278   |
| 7Networks_RH_Default_Par_3  | 0.07584    | 0.19682  | -0.10138  | 0.48369   |
| 7Networks_RH_Default_Temp_1 | -0.072035  | 0.23246  | -0.13063  | 0.2536    |
| 7Networks_RH_Default_Temp_2 | -0.06481   | 0.28543  | 0.25578   | 0.027171  |
| 7Networks_RH_Default_Temp_3 | -0.010969  | 0.86504  | 0.15502   | 0.13457   |
| 7Networks_RH_Default_Temp_4 | -0.090786  | 0.12372  | 0.14349   | 0.23308   |
| 7Networks_RH_Default_Temp_5 | -0.029523  | 0.62965  | 0.093208  | 0.48505   |
| 7Networks_RH_Default_PFCv_1 | 0.028163   | 0.64781  | 0.0085197 | 0.93844   |
| 7Networks_RH_Default_PFCm_1 | -0.028774  | 0.62448  | 0.093378  | 0.43438   |
| 7Networks_RH_Default_PFCm_2 | 0.11179    | 0.056766 | -0.088394 | 0.49661   |
| 7Networks_RH_Default_PFCm_3 | -0.079264  | 0.21623  | 0.084014  | 0.46581   |
| 7Networks_RH_Default_PFCm_4 | -0.061389  | 0.35221  | -0.040624 | 0.64718   |
| 7Networks_RH_Default_PFCm_5 | 0.10794    | 0.083631 | -0.2236   | 0.016305  |
| 7Networks_RH_Default_PFCm_6 | 0.12873    | 0.030521 | -0.31017  | 0.0075385 |
| 7Networks_RH_Default_PFCm_7 | 0.062026   | 0.27803  | -0.081251 | 0.58736   |
| 7Networks_RH_Default_PCC_1  | -0.10668   | 0.093358 | 0.108     | 0.33288   |
| 7Networks_RH_Default_PCC_2  | -0.074807  | 0.24147  | 0.066631  | 0.52251   |
| 7Networks_RH_Default_PCC_3  | 0.065721   | 0.25947  | 0.035262  | 0.79011   |

**Supplementary Table 9. Genetic and environmental correlation between Extraversion and cortical thickness in HCP.** Genetic correlation between Extraversion and local cortical thickness calculated using solar 8.4.0. Regions are named according to

the Schaefer 200 atlas, based on 7-networks. Here we report environmental correlation ( $\rho_e$ ) and genetic correlation ( $\rho_g$ ) and the associated p-values.

| ROI                          | $\rho_e$   | P        | $\rho_g$  | P       |
|------------------------------|------------|----------|-----------|---------|
| 7Networks_LH_Vis_1           | 0.053537   | 0.39554  | -0.080022 | 0.49455 |
| 7Networks_LH_Vis_2           | -0.085001  | 0.17545  | 0.1109    | 0.40806 |
| 7Networks_LH_Vis_3           | 0.039429   | 0.52086  | -0.29094  | 0.12616 |
| 7Networks_LH_Vis_4           | 0.069618   | 0.26821  | -0.090178 | 0.38445 |
| 7Networks_LH_Vis_5           | 0.040657   | 0.52541  | -0.15432  | 0.19358 |
| 7Networks_LH_Vis_6           | 0.060361   | 0.35379  | 0.024472  | 0.8298  |
| 7Networks_LH_Vis_7           | -0.0089871 | 0.89153  | -0.034108 | 0.74849 |
| 7Networks_LH_Vis_8           | -0.050117  | 0.38866  | -0.055774 | 0.70196 |
| 7Networks_LH_Vis_9           | -0.02416   | 0.70959  | -0.16524  | 0.12112 |
| 7Networks_LH_Vis_10          | 0.016238   | 0.80753  | -0.095617 | 0.35591 |
| 7Networks_LH_Vis_11          | -0.038029  | 0.5355   | -0.14332  | 0.26521 |
| 7Networks_LH_Vis_12          | 0.029155   | 0.66211  | -0.18079  | 0.11137 |
| 7Networks_LH_Vis_13          | -0.092174  | 0.18095  | -0.11126  | 0.28247 |
| 7Networks_LH_Vis_14          | -0.079717  | 0.22427  | -0.18043  | 0.11719 |
| 7Networks_LH_SomMot_1        | 0.091518   | 0.16996  | -0.162    | 0.13853 |
| 7Networks_LH_SomMot_2        | -0.0033659 | 0.95625  | -0.077091 | 0.59107 |
| 7Networks_LH_SomMot_3        | 0.0008662  | 0.98972  | -0.10388  | 0.32722 |
| 7Networks_LH_SomMot_4        | 0.062144   | 0.3342   | 0.095516  | 0.42968 |
| 7Networks_LH_SomMot_5        | 0.080971   | 0.17764  | -0.028336 | 0.85044 |
| 7Networks_LH_SomMot_6        | 0.018197   | 0.78616  | 0.0355    | 0.7311  |
| 7Networks_LH_SomMot_7        | 0.0044337  | 0.94375  | -0.026163 | 0.85543 |
| 7Networks_LH_SomMot_8        | 0.050155   | 0.4305   | -0.16214  | 0.26882 |
| 7Networks_LH_SomMot_9        | 0.039121   | 0.5333   | -0.037334 | 0.77424 |
| 7Networks_LH_SomMot_10       | -0.014293  | 0.8321   | -0.071083 | 0.50275 |
| 7Networks_LH_SomMot_11       | -0.0019291 | 0.9743   | 0.10793   | 0.49893 |
| 7Networks_LH_SomMot_12       | 0.024481   | 0.69978  | 0.050893  | 0.68949 |
| 7Networks_LH_SomMot_13       | 0.037204   | 0.56296  | -0.11595  | 0.39473 |
| 7Networks_LH_SomMot_14       | 0.013938   | 0.82307  | 0.0006109 | 0.99609 |
| 7Networks_LH_SomMot_15       | -0.0079652 | 0.90076  | 0.14473   | 0.20061 |
| 7Networks_LH_SomMot_16       | -0.076053  | 0.25921  | 0.032401  | 0.79724 |
| 7Networks_LH_DorsAttn_Post_1 | -0.16395   | 0.010125 | 0.18221   | 0.19733 |
| 7Networks_LH_DorsAttn_Post_2 | -0.025592  | 0.66519  | 0.085932  | 0.5839  |
| 7Networks_LH_DorsAttn_Post_3 | 0.021458   | 0.73394  | -0.11798  | 0.36056 |
| 7Networks_LH_DorsAttn_Post_4 | -0.072268  | 0.25862  | 0.068141  | 0.6048  |
| 7Networks_LH_DorsAttn_Post_5 | 0.033327   | 0.5771   | -0.16289  | 0.30803 |

|                                    |            |           |            |          |
|------------------------------------|------------|-----------|------------|----------|
| 7Networks_LH_DorsAttn_Post_6       | 0.043485   | 0.48169   | -0.26291   | 0.10776  |
| 7Networks_LH_DorsAttn_Post_7       | 0.081021   | 0.22564   | -0.061497  | 0.59763  |
| 7Networks_LH_DorsAttn_Post_8       | 0.068724   | 0.2678    | -0.079172  | 0.56127  |
| 7Networks_LH_DorsAttn_Post_9       | -0.041357  | 0.52659   | 0.04599    | 0.68303  |
| 7Networks_LH_DorsAttn_Post_10      | 0.012499   | 0.85286   | 0.094899   | 0.40641  |
| 7Networks_LH_DorsAttn_FEF_1        | 0.041959   | 0.49151   | -0.045694  | 0.7518   |
| 7Networks_LH_DorsAttn_FEF_2        | -0.026133  | 0.68853   | 0.27256    | 0.032747 |
| 7Networks_LH_DorsAttn_PrCv_1       | 0.025218   | 0.67801   | -0.12603   | 0.48072  |
| 7Networks_LH_SalVentAttn_ParOper_1 | 0.079801   | 0.18621   | -0.39486   | 0.050257 |
| 7Networks_LH_SalVentAttn_ParOper_2 | 0.09847    | 0.10104   | 0.062847   | 0.65047  |
| 7Networks_LH_SalVentAttn_ParOper_3 | -0.027282  | 0.65669   | 0.25781    | 0.11783  |
| 7Networks_LH_SalVentAttn_FrOper_1  | 0.021535   | 0.7316    | 0.081292   | 0.52399  |
| 7Networks_LH_SalVentAttn_FrOper_2  | 0.0040228  | 0.95092   | -0.02999   | 0.80516  |
| 7Networks_LH_SalVentAttn_FrOper_3  | -0.065504  | 0.31622   | 0.18495    | 0.11493  |
| 7Networks_LH_SalVentAttn_FrOper_4  | 0.078521   | 0.21202   | -0.23768   | 0.14091  |
| 7Networks_LH_SalVentAttn_PFC1_1    | 0.031273   | 0.62011   | 0.028991   | 0.79279  |
| 7Networks_LH_SalVentAttn_Med_1     | -0.031516  | 0.62802   | -0.0049621 | 0.97093  |
| 7Networks_LH_SalVentAttn_Med_2     | -0.0509    | 0.42794   | -0.051951  | 0.70107  |
| 7Networks_LH_SalVentAttn_Med_3     | -0.16597   | 0.0075355 | 0.31922    | 0.037709 |
| 7Networks_LH_Limbic_OFC_1          | -0.047383  | 0.43451   | 0.11043    | 0.41854  |
| 7Networks_LH_Limbic_OFC_2          | -0.026395  | 0.67966   | 0.14835    | 0.24876  |
| 7Networks_LH_Limbic_TempPole_1     | 0.0058285  | 0.92838   | -0.0025622 | 0.98482  |
| 7Networks_LH_Limbic_TempPole_2     | -0.0051759 | 0.93266   | 0.03622    | 0.76234  |
| 7Networks_LH_Limbic_TempPole_3     | -0.023271  | 0.69305   | 0.11885    | 0.42108  |
| 7Networks_LH_Limbic_TempPole_4     | 0.11511    | 0.079438  | -0.23433   | 0.040042 |
| 7Networks_LH_Cont_Par_1            | -0.042268  | 0.48702   | 0.095689   | 0.55504  |
| 7Networks_LH_Cont_Par_2            | 0.00833    | 0.88991   | -0.098702  | 0.48822  |
| 7Networks_LH_Cont_Par_3            | 0.0064707  | 0.91106   | -0.17782   | 0.6151   |
| 7Networks_LH_Cont_Temp_1           | -0.11517   | 0.056294  | 0.15167    | 0.3721   |
| 7Networks_LH_Cont_PFC1_1           | -0.10445   | 0.07608   | 0.14082    | 0.31262  |
| 7Networks_LH_Cont_PFC1_2           | 0.0024864  | 0.96805   | 0.12924    | 0.35719  |
| 7Networks_LH_Cont_PFC1_3           | 0.022492   | 0.72658   | -0.035246  | 0.77393  |
| 7Networks_LH_Cont_PFC1_4           | 0.11022    | 0.068968  | 0.0081348  | 0.95538  |
| 7Networks_LH_Cont_PFC1_5           | 0.078468   | 0.2138    | 0.044752   | 0.69926  |
| 7Networks_LH_Cont_PFC1_6           | -0.028699  | 0.63527   | 0.046735   | 0.77889  |
| 7Networks_LH_Cont_pCun_1           | 0.017133   | 0.78424   | -0.028656  | 0.81372  |
| 7Networks_LH_Cont_Cing_1           | 0.062287   | 0.36574   | 0.049674   | 0.64097  |
| 7Networks_LH_Cont_Cing_2           | -0.018677  | 0.77418   | 0.029035   | 0.82281  |
| 7Networks_LH_Default_Temp_1        | -0.019248  | 0.76154   | 0.08072    | 0.5824   |

|                             |            |           |           |           |
|-----------------------------|------------|-----------|-----------|-----------|
| 7Networks_LH_Default_Temp_2 | -0.18277   | 0.0025379 | 0.30708   | 0.028699  |
| 7Networks_LH_Default_Temp_3 | -0.037831  | 0.54635   | 0.059492  | 0.64693   |
| 7Networks_LH_Default_Temp_4 | -0.02172   | 0.7212    | 0.11325   | 0.51445   |
| 7Networks_LH_Default_Temp_5 | 0.12704    | 0.044484  | -0.2608   | 0.10646   |
| 7Networks_LH_Default_Temp_6 | -0.094622  | 0.11834   | -0.096021 | 0.49354   |
| 7Networks_LH_Default_Temp_7 | -0.021291  | 0.73531   | -0.15165  | 0.27841   |
| 7Networks_LH_Default_Temp_8 | 0.02711    | 0.6559    | -0.25684  | 0.089084  |
| 7Networks_LH_Default_Temp_9 | -0.01211   | 0.83802   | -0.11566  | 0.41095   |
| 7Networks_LH_Default_PFC_1  | 0.008559   | 0.89191   | 0.063287  | 0.61523   |
| 7Networks_LH_Default_PFC_2  | 0.0097872  | 0.87605   | -0.091627 | 0.53662   |
| 7Networks_LH_Default_PFC_3  | -0.054574  | 0.34975   | 0.54331   | 0.0062386 |
| 7Networks_LH_Default_PFC_4  | 0.0734     | 0.26474   | 0.029364  | 0.7767    |
| 7Networks_LH_Default_PFC_5  | 0.036195   | 0.57149   | 0.10258   | 0.4587    |
| 7Networks_LH_Default_PFC_6  | 0.046967   | 0.45348   | -0.081911 | 0.52946   |
| 7Networks_LH_Default_PFC_7  | 0.018851   | 0.77837   | 0.088869  | 0.40692   |
| 7Networks_LH_Default_PFC_8  | 0.041454   | 0.52853   | -0.23808  | 0.060608  |
| 7Networks_LH_Default_PFC_9  | 0.077158   | 0.23269   | 0.16521   | 0.12984   |
| 7Networks_LH_Default_PFC_10 | -0.0014469 | 0.98126   | 0.2267    | 0.064771  |
| 7Networks_LH_Default_PFC_11 | 0.013029   | 0.83558   | 0.19112   | 0.087605  |
| 7Networks_LH_Default_PFC_12 | 0.073851   | 0.25637   | 0.039332  | 0.71993   |
| 7Networks_LH_Default_PFC_13 | 0.011871   | 0.85637   | 0.2071    | 0.060798  |
| 7Networks_LH_Default_PCC_1  | 0.041692   | 0.52181   | -0.027633 | 0.82436   |
| 7Networks_LH_Default_PCC_2  | 0.011513   | 0.84931   | -0.034073 | 0.80824   |
| 7Networks_LH_Default_PCC_3  | -0.015493  | 0.81005   | 0.0045453 | 0.97047   |
| 7Networks_LH_Default_PCC_4  | 0.022176   | 0.73478   | -0.07873  | 0.5274    |
| 7Networks_LH_Default_PHC_1  | -0.012888  | 0.84913   | 0.072734  | 0.53178   |
| 7Networks_RH_Vis_1          | -0.10692   | 0.088373  | 0.069403  | 0.58062   |
| 7Networks_RH_Vis_2          | 0.079509   | 0.21906   | -0.19484  | 0.13632   |
| 7Networks_RH_Vis_3          | 0.046323   | 0.47771   | -0.022524 | 0.86002   |
| 7Networks_RH_Vis_4          | 0.20965    | 0.0018512 | -0.22295  | 0.021199  |
| 7Networks_RH_Vis_5          | -0.10183   | 0.097222  | 0.11306   | 0.42317   |
| 7Networks_RH_Vis_6          | 0.14308    | 0.028281  | -0.18751  | 0.089969  |
| 7Networks_RH_Vis_7          | 0.035772   | 0.58779   | 0.019244  | 0.85419   |
| 7Networks_RH_Vis_8          | 0.01956    | 0.76714   | -0.14968  | 0.20488   |
| 7Networks_RH_Vis_9          | 0.11032    | 0.10562   | -0.13142  | 0.18503   |
| 7Networks_RH_Vis_10         | 0.10643    | 0.11375   | -0.27396  | 0.016507  |
| 7Networks_RH_Vis_11         | -0.054489  | 0.35761   | -0.15089  | 0.31436   |
| 7Networks_RH_Vis_12         | -0.018922  | 0.77813   | -0.16057  | 0.13046   |
| 7Networks_RH_Vis_13         | 0.10284    | 0.1147    | -0.19221  | 0.084952  |



|                                       |            |          |            |           |
|---------------------------------------|------------|----------|------------|-----------|
| 7Networks_RH_Vis_14                   | 0.055131   | 0.39844  | -0.065248  | 0.5747    |
| 7Networks_RH_Vis_15                   | 0.0061621  | 0.9205   | -0.2335    | 0.10633   |
| 7Networks_RH_SomMot_1                 | 0.032782   | 0.61995  | -0.0341    | 0.77207   |
| 7Networks_RH_SomMot_2                 | -0.03881   | 0.55165  | 0.065865   | 0.62779   |
| 7Networks_RH_SomMot_3                 | -0.028605  | 0.65841  | -0.096233  | 0.46683   |
| 7Networks_RH_SomMot_4                 | 0.13351    | 0.03729  | -0.32774   | 0.010006  |
| 7Networks_RH_SomMot_5                 | 0.02142    | 0.72438  | -0.10228   | 0.5575    |
| 7Networks_RH_SomMot_6                 | -0.059529  | 0.34211  | 0.39681    | 0.0043669 |
| 7Networks_RH_SomMot_7                 | -0.027023  | 0.67459  | 0.089866   | 0.42844   |
| 7Networks_RH_SomMot_8                 | -0.012817  | 0.82893  | -0.15698   | 0.3524    |
| 7Networks_RH_SomMot_9                 | -0.061856  | 0.34738  | 0.099585   | 0.46975   |
| 7Networks_RH_SomMot_10                | -0.083616  | 0.17576  | 0.33604    | 0.07144   |
| 7Networks_RH_SomMot_11                | -0.054939  | 0.36693  | -0.060138  | 0.65642   |
| 7Networks_RH_SomMot_12                | 0.029496   | 0.65251  | -0.095682  | 0.39314   |
| 7Networks_RH_SomMot_13                | 0.039699   | 0.51591  | -0.10734   | 0.42019   |
| 7Networks_RH_SomMot_14                | -0.060215  | 0.34624  | 0.20887    | 0.082407  |
| 7Networks_RH_SomMot_15                | 0.074078   | 0.25471  | -0.21551   | 0.1102    |
| 7Networks_RH_SomMot_16                | 0.044258   | 0.48576  | -0.017018  | 0.9083    |
| 7Networks_RH_SomMot_17                | 0.016732   | 0.80182  | 0.0034331  | 0.9743    |
| 7Networks_RH_SomMot_18                | -0.0002032 | 0.99724  | 0.0729     | 0.54356   |
| 7Networks_RH_SomMot_19                | 0.037853   | 0.56816  | -0.044358  | 0.7071    |
| 7Networks_RH_DorsAttn_Post_1          | 0.12956    | 0.033488 | -0.39271   | 0.0090691 |
| 7Networks_RH_DorsAttn_Post_2          | -0.042592  | 0.4863   | 0.047714   | 0.75593   |
| 7Networks_RH_DorsAttn_Post_3          | -0.055149  | 0.36853  | 0.1499     | 0.26152   |
| 7Networks_RH_DorsAttn_Post_4          | -0.066956  | 0.27209  | 0.035153   | 0.82871   |
| 7Networks_RH_DorsAttn_Post_5          | -0.034534  | 0.57084  | 0.002895   | 0.9866    |
| 7Networks_RH_DorsAttn_Post_6          | -0.048955  | 0.44155  | 0.016534   | 0.89107   |
| 7Networks_RH_DorsAttn_Post_7          | -0.052304  | 0.37659  | -0.13033   | 0.50992   |
| 7Networks_RH_DorsAttn_Post_8          | -0.021661  | 0.73243  | -0.04801   | 0.70717   |
| 7Networks_RH_DorsAttn_Post_9          | -0.012034  | 0.84687  | -0.0079447 | 0.95142   |
| 7Networks_RH_DorsAttn_Post_10         | 0.063493   | 0.32141  | -0.054187  | 0.64792   |
| 7Networks_RH_DorsAttn_FEF_1           | 0.036238   | 0.57044  | -0.082884  | 0.55697   |
| 7Networks_RH_DorsAttn_FEF_2           | -0.10139   | 0.094386 | 0.23664    | 0.13632   |
| 7Networks_RH_DorsAttn_PrCv_1          | 0.043708   | 0.48577  | 0.015835   | 0.90703   |
| 7Networks_RH_SalVentAttn_TempOccPar_1 | 0.025134   | 0.68427  | -0.27981   | 0.07122   |
| 7Networks_RH_SalVentAttn_TempOccPar_2 | 0.025227   | 0.66675  | -0.046896  | 0.79158   |
| 7Networks_RH_SalVentAttn_TempOccPar_3 | -0.0060195 | 0.92069  | -0.046135  | 0.75756   |
| 7Networks_RH_SalVentAttn_PrC_1        | -0.039251  | 0.51251  | 0.12158    | 0.5175    |
| 7Networks_RH_SalVentAttn_FrOper_1     | 0.066307   | 0.28731  | -0.16304   | 0.26723   |



|                                   |            |          |            |          |
|-----------------------------------|------------|----------|------------|----------|
| 7Networks_RH_SalVentAttn_FrOper_2 | -0.0089948 | 0.8961   | -0.048914  | 0.66139  |
| 7Networks_RH_SalVentAttn_FrOper_3 | -0.02695   | 0.66061  | -0.093119  | 0.47909  |
| 7Networks_RH_SalVentAttn_FrOper_4 | -0.023284  | 0.70533  | 0.073645   | 0.62407  |
| 7Networks_RH_SalVentAttn_Med_1    | 0.0077895  | 0.89902  | -0.087767  | 0.5504   |
| 7Networks_RH_SalVentAttn_Med_2    | -0.02831   | 0.65829  | -0.1114    | 0.3448   |
| 7Networks_RH_SalVentAttn_Med_3    | -0.055515  | 0.39558  | 0.18657    | 0.171    |
| 7Networks_RH_Limbic_OFC_1         | -0.020512  | 0.75904  | -0.0068245 | 0.9561   |
| 7Networks_RH_Limbic_OFC_2         | -0.027698  | 0.65098  | -0.0096158 | 0.93808  |
| 7Networks_RH_Limbic_OFC_3         | -0.00191   | 0.97631  | -0.0046917 | 0.96927  |
| 7Networks_RH_Limbic_TempPole_1    | 0.0028129  | 0.96242  | 0.0094998  | 0.95699  |
| 7Networks_RH_Limbic_TempPole_2    | 0.04069    | 0.52812  | -0.21731   | 0.094393 |
| 7Networks_RH_Limbic_TempPole_3    | -0.017347  | 0.79823  | 0.020666   | 0.84912  |
| 7Networks_RH_Cont_Par_1           | 0.042869   | 0.47291  | -0.030203  | 0.87495  |
| 7Networks_RH_Cont_Par_2           | -0.049235  | 0.40761  | 0.047455   | 0.77758  |
| 7Networks_RH_Cont_Par_3           | -0.0673    | 0.25583  | -0.082241  | 0.68871  |
| 7Networks_RH_Cont_Temp_1          | -0.0271    | 0.66604  | 0.06713    | 0.68218  |
| 7Networks_RH_Cont_PFCv_1          | -0.033149  | 0.58753  | -0.11875   | 0.47414  |
| 7Networks_RH_Cont_PFCl_1          | -0.049598  | 0.41437  | -0.063746  | 0.65747  |
| 7Networks_RH_Cont_PFCl_2          | 0.0083144  | 0.89339  | -0.081534  | 0.55489  |
| 7Networks_RH_Cont_PFCl_3          | -0.011735  | 0.84692  | 0.060028   | 0.63876  |
| 7Networks_RH_Cont_PFCl_4          | -0.041926  | 0.51093  | 0.089136   | 0.44296  |
| 7Networks_RH_Cont_PFCl_5          | 0.010977   | 0.85801  | 0.078803   | 0.54055  |
| 7Networks_RH_Cont_PFCl_6          | 0.029267   | 0.62772  | 0.26061    | 0.044661 |
| 7Networks_RH_Cont_PFCl_7          | -0.054037  | 0.40326  | 0.1808     | 0.17861  |
| 7Networks_RH_Cont_pCun_1          | 0.026904   | 0.65622  | -0.093957  | 0.51925  |
| 7Networks_RH_Cont_PFCmp_1         | -0.082324  | 0.20068  | 0.18823    | 0.080778 |
| 7Networks_RH_Cont_PFCmp_2         | -0.12242   | 0.059834 | 0.20125    | 0.093539 |
| 7Networks_RH_Cont_PFCmp_3         | -0.0023353 | 0.97013  | 0.075503   | 0.60523  |
| 7Networks_RH_Cont_PFCmp_4         | 0.037722   | 0.57667  | 0.15783    | 0.17972  |
| 7Networks_RH_Default_Par_1        | -0.092129  | 0.14154  | 0.20127    | 0.20897  |
| 7Networks_RH_Default_Par_2        | -0.13136   | 0.029462 | 0.19083    | 0.25272  |
| 7Networks_RH_Default_Par_3        | -0.096041  | 0.10903  | 0.17631    | 0.29545  |
| 7Networks_RH_Default_Temp_1       | 0.10527    | 0.090832 | -0.0009406 | 0.99403  |
| 7Networks_RH_Default_Temp_2       | -0.032442  | 0.60537  | 0.046196   | 0.73227  |
| 7Networks_RH_Default_Temp_3       | -0.04314   | 0.52315  | -0.0025058 | 0.98349  |
| 7Networks_RH_Default_Temp_4       | 0.046821   | 0.44162  | 0.027101   | 0.84237  |
| 7Networks_RH_Default_Temp_5       | -0.01359   | 0.829    | -0.094507  | 0.54411  |
| 7Networks_RH_Default_PFCv_1       | -0.020133  | 0.75225  | 0.14711    | 0.25633  |
| 7Networks_RH_Default_PFCm_1       | 0.12364    | 0.040129 | -0.2789    | 0.043711 |

|                             |            |         |           |          |
|-----------------------------|------------|---------|-----------|----------|
| 7Networks_RH_Default_PFCm_2 | 0.0011902  | 0.98433 | -0.047617 | 0.75028  |
| 7Networks_RH_Default_PFCm_3 | -0.052223  | 0.43133 | 0.11435   | 0.40067  |
| 7Networks_RH_Default_PFCm_4 | 0.028907   | 0.6746  | 0.1454    | 0.15898  |
| 7Networks_RH_Default_PFCm_5 | 0.040152   | 0.53835 | 0.20964   | 0.050636 |
| 7Networks_RH_Default_PFCm_6 | -0.060876  | 0.32567 | 0.23515   | 0.074308 |
| 7Networks_RH_Default_PFCm_7 | -0.0021966 | 0.97005 | 0.062016  | 0.71978  |
| 7Networks_RH_Default_PCC_1  | 0.065014   | 0.32566 | -0.12205  | 0.34071  |
| 7Networks_RH_Default_PCC_2  | 0.032446   | 0.62287 | -0.14395  | 0.23764  |
| 7Networks_RH_Default_PCC_3  | -0.046719  | 0.43497 | -0.10252  | 0.50449  |

**Supplementary Table 10. Genetic and environmental correlation between Neuroticism and cortical thickness in HCP.** Genetic correlation between Neuroticism and local cortical thickness calculated using solar 8.4.0. Regions are named according to the Schaefer 200 atlas, based on 7-networks. Here we report environmental correlation ( $\rho_e$ ) and genetic correlation ( $\rho_g$ ) and the associated p-values.

| ROI                   | $\rho_e$   | P             | $\rho_g$  | P             |
|-----------------------|------------|---------------|-----------|---------------|
| 7Networks_LH_Vis_1    | -0.047877  | 0.45749       | 0.25034   | 0.004226<br>1 |
| 7Networks_LH_Vis_2    | -0.0027296 | 0.96605       | 0.010559  | 0.91487       |
| 7Networks_LH_Vis_3    | 0.0020641  | 0.97383       | -0.13515  | 0.34983       |
| 7Networks_LH_Vis_4    | 0.065051   | 0.30471       | 0.026561  | 0.73032       |
| 7Networks_LH_Vis_5    | 0.031692   | 0.62767       | -0.055558 | 0.5298        |
| 7Networks_LH_Vis_6    | -0.016376  | 0.80384       | 0.068957  | 0.40936       |
| 7Networks_LH_Vis_7    | -0.0011101 | 0.98665       | 0.074864  | 0.34494       |
| 7Networks_LH_Vis_8    | -0.14611   | 0.014575      | 0.20597   | 0.057727      |
| 7Networks_LH_Vis_9    | 0.11043    | 0.089814      | 0.0078776 | 0.92191       |
| 7Networks_LH_Vis_10   | -0.084906  | 0.20532       | 0.085363  | 0.26812       |
| 7Networks_LH_Vis_11   | 0.19401    | 0.001917<br>7 | -0.17036  | 0.07541       |
| 7Networks_LH_Vis_12   | -0.027136  | 0.68839       | 0.035967  | 0.66643       |
| 7Networks_LH_Vis_13   | -0.082967  | 0.23039       | 0.024316  | 0.75156       |
| 7Networks_LH_Vis_14   | 0.085281   | 0.20056       | -0.098157 | 0.24969       |
| 7Networks_LH_SomMot_1 | -0.040441  | 0.54663       | 0.14549   | 0.074439      |
| 7Networks_LH_SomMot_2 | -0.031094  | 0.6214        | 0.1756    | 0.099401      |
| 7Networks_LH_SomMot_3 | 0.045761   | 0.49958       | 0.061823  | 0.43304       |
| 7Networks_LH_SomMot_4 | 0.094192   | 0.14969       | 0.040456  | 0.65443       |
| 7Networks_LH_SomMot_5 | -0.036404  | 0.55775       | -0.081721 | 0.46516       |
| 7Networks_LH_SomMot_6 | 0.1341     | 0.046001      | -0.045297 | 0.55884       |
| 7Networks_LH_SomMot_7 | -0.038099  | 0.56128       | 0.038746  | 0.71698       |
| 7Networks_LH_SomMot_8 | 0.099988   | 0.12581       | -0.25277  | 0.01901       |
| 7Networks_LH_SomMot_9 | -0.018037  | 0.78009       | -0.10423  | 0.2824        |

|                                    |            |          |            |               |
|------------------------------------|------------|----------|------------|---------------|
| 7Networks_LH_SomMot_10             | 0.064797   | 0.33952  | 0.040622   | 0.6086        |
| 7Networks_LH_SomMot_11             | -0.0013146 | 0.98293  | -0.19634   | 0.098135      |
| 7Networks_LH_SomMot_12             | -0.0023356 | 0.96948  | -0.013002  | 0.89045       |
| 7Networks_LH_SomMot_13             | -0.13066   | 0.047272 | 0.061289   | 0.5401        |
| 7Networks_LH_SomMot_14             | 0.012453   | 0.84395  | -0.050036  | 0.58395       |
| 7Networks_LH_SomMot_15             | 0.13834    | 0.037146 | -0.087852  | 0.28975       |
| 7Networks_LH_SomMot_16             | 0.12312    | 0.071644 | -0.043525  | 0.65425       |
| 7Networks_LH_DorsAttn_Post_1       | 0.054777   | 0.41234  | -0.0047965 | 0.96245       |
| 7Networks_LH_DorsAttn_Post_2       | -0.074136  | 0.22368  | -0.026498  | 0.82176       |
| 7Networks_LH_DorsAttn_Post_3       | 0.0059476  | 0.92658  | -0.12272   | 0.20424       |
| 7Networks_LH_DorsAttn_Post_4       | 0.040624   | 0.53783  | -0.043703  | 0.65485       |
| 7Networks_LH_DorsAttn_Post_5       | 0.0055079  | 0.92948  | -0.12125   | 0.30778       |
| 7Networks_LH_DorsAttn_Post_6       | 0.047818   | 0.45868  | -0.31287   | 0.008197<br>3 |
| 7Networks_LH_DorsAttn_Post_7       | 0.048414   | 0.48084  | -0.15208   | 0.071998      |
| 7Networks_LH_DorsAttn_Post_8       | -0.0083791 | 0.89699  | -0.14415   | 0.15702       |
| 7Networks_LH_DorsAttn_Post_9       | 0.088791   | 0.18619  | -0.10055   | 0.2293        |
| 7Networks_LH_DorsAttn_Post_10      | 0.077377   | 0.25989  | -0.12791   | 0.12901       |
| 7Networks_LH_DorsAttn_FEF_1        | 0.02409    | 0.69992  | -0.11174   | 0.29934       |
| 7Networks_LH_DorsAttn_FEF_2        | -0.0054613 | 0.93412  | -0.11127   | 0.24493       |
| 7Networks_LH_DorsAttn_PrCv_1       | -0.14019   | 0.025654 | 0.27029    | 0.034949      |
| 7Networks_LH_SalVentAttn_ParOper_1 | -0.011825  | 0.84995  | -0.1362    | 0.37587       |
| 7Networks_LH_SalVentAttn_ParOper_2 | 0.1058     | 0.08768  | -0.15232   | 0.1434        |
| 7Networks_LH_SalVentAttn_ParOper_3 | 0.046311   | 0.4699   | -0.1865    | 0.13163       |
| 7Networks_LH_SalVentAttn_FrOper_1  | 0.031429   | 0.62575  | -0.014733  | 0.87668       |
| 7Networks_LH_SalVentAttn_FrOper_2  | -0.077199  | 0.24107  | 0.15156    | 0.092961      |
| 7Networks_LH_SalVentAttn_FrOper_3  | -0.0031189 | 0.96208  | -0.0062703 | 0.94248       |
| 7Networks_LH_SalVentAttn_FrOper_4  | -0.12037   | 0.06786  | 0.15277    | 0.18585       |
| 7Networks_LH_SalVentAttn_PFC1_1    | -0.013474  | 0.83232  | -0.19769   | 0.016261      |
| 7Networks_LH_SalVentAttn_Med_1     | 0.058263   | 0.37685  | -0.16551   | 0.099074      |
| 7Networks_LH_SalVentAttn_Med_2     | 0.023709   | 0.71767  | -0.10352   | 0.30122       |
| 7Networks_LH_SalVentAttn_Med_3     | -0.016261  | 0.7995   | -0.019578  | 0.86445       |
| 7Networks_LH_Limbic_OFC_1          | -0.064079  | 0.3039   | -0.010361  | 0.91867       |
| 7Networks_LH_Limbic_OFC_2          | -0.046152  | 0.48162  | 0.073162   | 0.44974       |
| 7Networks_LH_Limbic_TempPole_1     | -0.12799   | 0.053521 | 0.1865     | 0.060594      |
| 7Networks_LH_Limbic_TempPole_2     | -0.11102   | 0.073703 | 0.11613    | 0.19772       |
| 7Networks_LH_Limbic_TempPole_3     | -0.093617  | 0.12441  | 0.22367    | 0.040437      |
| 7Networks_LH_Limbic_TempPole_4     | 0.048096   | 0.47474  | 0.10383    | 0.22468       |
| 7Networks_LH_Cont_Par_1            | 0.012376   | 0.84411  | -0.24586   | 0.041558      |

|                             |            |               |            |               |
|-----------------------------|------------|---------------|------------|---------------|
| 7Networks_LH_Cont_Par_2     | 0.055685   | 0.37754       | -0.16076   | 0.1255        |
| 7Networks_LH_Cont_Par_3     | 0.023072   | 0.7035        | -0.61527   | 0.023377      |
| 7Networks_LH_Cont_Temp_1    | -0.051739  | 0.40668       | 0.015634   | 0.90259       |
| 7Networks_LH_Cont_PFC1_1    | -0.028233  | 0.63992       | -0.12102   | 0.25479       |
| 7Networks_LH_Cont_PFC1_2    | -0.056376  | 0.37569       | 0.0026803  | 0.97926       |
| 7Networks_LH_Cont_PFC1_3    | -0.025933  | 0.6915        | -0.17792   | 0.047717      |
| 7Networks_LH_Cont_PFC1_4    | -0.12514   | 0.046221      | -0.14873   | 0.17119       |
| 7Networks_LH_Cont_PFC1_5    | -0.060778  | 0.34531       | -0.020322  | 0.81417       |
| 7Networks_LH_Cont_PFC1_6    | -0.10145   | 0.10372       | 0.02227    | 0.85701       |
| 7Networks_LH_Cont_pCun_1    | -0.13945   | 0.028334      | 0.064878   | 0.47417       |
| 7Networks_LH_Cont_Cing_1    | -0.16194   | 0.017895      | 0.13782    | 0.078656      |
| 7Networks_LH_Cont_Cing_2    | -0.031663  | 0.63316       | 0.093499   | 0.32624       |
| 7Networks_LH_Default_Temp_1 | -0.1366    | 0.037612      | 0.28867    | 0.006779<br>8 |
| 7Networks_LH_Default_Temp_2 | -0.18056   | 0.003735<br>7 | 0.032467   | 0.75837       |
| 7Networks_LH_Default_Temp_3 | -0.025449  | 0.69124       | 0.087542   | 0.36563       |
| 7Networks_LH_Default_Temp_4 | -0.094748  | 0.12986       | 0.2418     | 0.068916      |
| 7Networks_LH_Default_Temp_5 | -0.10286   | 0.10565       | 0.2069     | 0.10886       |
| 7Networks_LH_Default_Temp_6 | -0.082272  | 0.18578       | 0.2374     | 0.024113      |
| 7Networks_LH_Default_Temp_7 | 0.036942   | 0.5685        | -0.19257   | 0.063367      |
| 7Networks_LH_Default_Temp_8 | -0.042844  | 0.49552       | -0.0049762 | 0.96433       |
| 7Networks_LH_Default_Temp_9 | -0.026336  | 0.66691       | -0.093316  | 0.37622       |
| 7Networks_LH_Default_PFC_1  | -0.0037976 | 0.95269       | 0.044949   | 0.62807       |
| 7Networks_LH_Default_PFC_2  | 0.066145   | 0.3062        | -0.042077  | 0.70106       |
| 7Networks_LH_Default_PFC_3  | -0.087375  | 0.15028       | 0.18103    | 0.19311       |
| 7Networks_LH_Default_PFC_4  | -0.027099  | 0.68338       | -0.088624  | 0.25236       |
| 7Networks_LH_Default_PFC_5  | -0.1218    | 0.06425       | 0.046441   | 0.64919       |
| 7Networks_LH_Default_PFC_6  | -0.065028  | 0.30734       | -0.037655  | 0.69885       |
| 7Networks_LH_Default_PFC_7  | -0.01271   | 0.85047       | -0.12836   | 0.10752       |
| 7Networks_LH_Default_PFC_8  | -0.065448  | 0.33233       | 0.037162   | 0.69332       |
| 7Networks_LH_Default_PFC_9  | -0.050075  | 0.44229       | -0.12706   | 0.11676       |
| 7Networks_LH_Default_PFC_10 | 0.043267   | 0.49506       | -0.14947   | 0.096427      |
| 7Networks_LH_Default_PFC_11 | 0.01802    | 0.77713       | -0.19591   | 0.019358      |
| 7Networks_LH_Default_PFC_12 | -0.049657  | 0.45166       | -0.078663  | 0.33485       |
| 7Networks_LH_Default_PFC_13 | -0.014897  | 0.82266       | -0.033393  | 0.68652       |
| 7Networks_LH_Default_PCC_1  | -0.20284   | 0.002147<br>8 | 0.31793    | 0.000429<br>6 |
| 7Networks_LH_Default_PCC_2  | 0.031194   | 0.61785       | 0.054649   | 0.60259       |
| 7Networks_LH_Default_PCC_3  | 0.060689   | 0.35253       | -0.13911   | 0.12258       |

|                              |            |          |            |          |
|------------------------------|------------|----------|------------|----------|
| 7Networks_LH_Default_PCC_4   | -0.024948  | 0.70905  | -0.047753  | 0.6054   |
| 7Networks_LH_Default_PHC_1   | -0.08906   | 0.19414  | 0.11631    | 0.17103  |
| 7Networks_RH_Vis_1           | 0.011955   | 0.85296  | 0.039556   | 0.67133  |
| 7Networks_RH_Vis_2           | -0.044233  | 0.50293  | 0.053047   | 0.59047  |
| 7Networks_RH_Vis_3           | -0.034403  | 0.60608  | 0.17045    | 0.075226 |
| 7Networks_RH_Vis_4           | 0.014586   | 0.83018  | 0.058569   | 0.4162   |
| 7Networks_RH_Vis_5           | 2.23e-05   | 1        | 0.16618    | 0.11398  |
| 7Networks_RH_Vis_6           | -0.15573   | 0.018292 | 0.21051    | 0.014021 |
| 7Networks_RH_Vis_7           | 0.011149   | 0.8669   | 0.031504   | 0.68596  |
| 7Networks_RH_Vis_8           | -0.014096  | 0.83416  | 0.088537   | 0.31086  |
| 7Networks_RH_Vis_9           | -0.043623  | 0.52785  | 0.0017798  | 0.98085  |
| 7Networks_RH_Vis_10          | 0.015104   | 0.82725  | 0.017292   | 0.8381   |
| 7Networks_RH_Vis_11          | 0.013021   | 0.83155  | 0.046146   | 0.67972  |
| 7Networks_RH_Vis_12          | 0.059262   | 0.38287  | 0.003335   | 0.96442  |
| 7Networks_RH_Vis_13          | 0.041056   | 0.53805  | 0.090736   | 0.26667  |
| 7Networks_RH_Vis_14          | 0.034435   | 0.60881  | -0.05475   | 0.52642  |
| 7Networks_RH_Vis_15          | 0.10597    | 0.098354 | -0.092332  | 0.38799  |
| 7Networks_RH_SomMot_1        | 0.087682   | 0.1907   | 0.062613   | 0.4715   |
| 7Networks_RH_SomMot_2        | -0.012096  | 0.85655  | 0.06734    | 0.50151  |
| 7Networks_RH_SomMot_3        | 0.0020774  | 0.97408  | 0.021084   | 0.8304   |
| 7Networks_RH_SomMot_4        | -0.057146  | 0.37929  | 0.13923    | 0.15527  |
| 7Networks_RH_SomMot_5        | 0.008822   | 0.88914  | 0.004562   | 0.97189  |
| 7Networks_RH_SomMot_6        | 0.075046   | 0.2463   | -0.11337   | 0.28198  |
| 7Networks_RH_SomMot_7        | 0.090575   | 0.16481  | -0.041182  | 0.62654  |
| 7Networks_RH_SomMot_8        | 0.069932   | 0.25704  | -0.052423  | 0.67574  |
| 7Networks_RH_SomMot_9        | -0.037802  | 0.57812  | -0.062285  | 0.54451  |
| 7Networks_RH_SomMot_10       | 0.01087    | 0.86578  | 0.031528   | 0.82012  |
| 7Networks_RH_SomMot_11       | 0.07053    | 0.26825  | -0.093008  | 0.35519  |
| 7Networks_RH_SomMot_12       | 0.12959    | 0.049368 | 0.0179     | 0.82962  |
| 7Networks_RH_SomMot_13       | 0.11337    | 0.071887 | -0.20319   | 0.038311 |
| 7Networks_RH_SomMot_14       | -0.0188    | 0.77175  | -0.022283  | 0.80584  |
| 7Networks_RH_SomMot_15       | 0.01978    | 0.77068  | -0.012566  | 0.89989  |
| 7Networks_RH_SomMot_16       | 0.022899   | 0.72677  | -0.05458   | 0.61832  |
| 7Networks_RH_SomMot_17       | -0.0043214 | 0.94892  | 0.051149   | 0.52805  |
| 7Networks_RH_SomMot_18       | 0.069537   | 0.27114  | 0.039778   | 0.65626  |
| 7Networks_RH_SomMot_19       | 0.14314    | 0.032471 | -0.0065742 | 0.94095  |
| 7Networks_RH_DorsAttn_Post_1 | 0.041513   | 0.51182  | 0.16284    | 0.15244  |
| 7Networks_RH_DorsAttn_Post_2 | 0.0081352  | 0.89745  | 0.17148    | 0.13439  |
| 7Networks_RH_DorsAttn_Post_3 | 0.03494    | 0.57841  | -0.10873   | 0.27805  |

|                                       |            |          |            |           |
|---------------------------------------|------------|----------|------------|-----------|
| 7Networks_RH_DorsAttn_Post_4          | -0.0082814 | 0.89591  | -0.12842   | 0.28487   |
| 7Networks_RH_DorsAttn_Post_5          | 0.012089   | 0.84967  | -0.044443  | 0.73021   |
| 7Networks_RH_DorsAttn_Post_6          | 0.030115   | 0.64281  | -0.11829   | 0.18505   |
| 7Networks_RH_DorsAttn_Post_7          | 0.0056954  | 0.92648  | -0.13212   | 0.36486   |
| 7Networks_RH_DorsAttn_Post_8          | -0.044658  | 0.49063  | 0.015317   | 0.87166   |
| 7Networks_RH_DorsAttn_Post_9          | 0.0091581  | 0.88671  | -0.026618  | 0.78467   |
| 7Networks_RH_DorsAttn_Post_10         | -0.055311  | 0.39592  | 0.016689   | 0.84876   |
| 7Networks_RH_DorsAttn_FEF_1           | 0.072076   | 0.27177  | -0.15759   | 0.13453   |
| 7Networks_RH_DorsAttn_FEF_2           | 0.08876    | 0.15261  | -0.26742   | 0.0261    |
| 7Networks_RH_DorsAttn_PrCv_1          | -0.026636  | 0.67973  | 0.028124   | 0.78175   |
| 7Networks_RH_SalVentAttn_TempOccPar_1 | 0.025323   | 0.69037  | 0.17683    | 0.13029   |
| 7Networks_RH_SalVentAttn_TempOccPar_2 | 0.090708   | 0.13254  | -0.10111   | 0.44799   |
| 7Networks_RH_SalVentAttn_TempOccPar_3 | 0.005516   | 0.92941  | 0.032502   | 0.77013   |
| 7Networks_RH_SalVentAttn_PrC_1        | -0.015161  | 0.80795  | 0.070134   | 0.61581   |
| 7Networks_RH_SalVentAttn_FrOper_1     | -0.03008   | 0.64129  | 0.25572    | 0.017876  |
| 7Networks_RH_SalVentAttn_FrOper_2     | 0.14804    | 0.032053 | -0.0005382 | 0.99459   |
| 7Networks_RH_SalVentAttn_FrOper_3     | -0.10011   | 0.10956  | 0.14946    | 0.13266   |
| 7Networks_RH_SalVentAttn_FrOper_4     | -0.091993  | 0.14994  | 0.25337    | 0.021244  |
| 7Networks_RH_SalVentAttn_Med_1        | 0.083248   | 0.18554  | -0.14304   | 0.19007   |
| 7Networks_RH_SalVentAttn_Med_2        | -0.0069754 | 0.91502  | 0.01306    | 0.88142   |
| 7Networks_RH_SalVentAttn_Med_3        | 0.14057    | 0.034752 | -0.10546   | 0.29909   |
| 7Networks_RH_Limbic_OFC_1             | 0.0028532  | 0.96657  | 0.026906   | 0.76803   |
| 7Networks_RH_Limbic_OFC_2             | -0.079244  | 0.20085  | 0.13042    | 0.15977   |
| 7Networks_RH_Limbic_OFC_3             | 0.021672   | 0.74012  | -0.1467    | 0.11436   |
| 7Networks_RH_Limbic_TempPole_1        | -0.0043151 | 0.94411  | 0.36748    | 0.0045149 |
| 7Networks_RH_Limbic_TempPole_2        | -0.048192  | 0.46232  | 0.15112    | 0.11722   |
| 7Networks_RH_Limbic_TempPole_3        | -0.018937  | 0.78204  | 0.011975   | 0.88168   |
| 7Networks_RH_Cont_Par_1               | 0.034226   | 0.58469  | -0.040601  | 0.77741   |
| 7Networks_RH_Cont_Par_2               | 0.046798   | 0.44736  | -0.11663   | 0.34767   |
| 7Networks_RH_Cont_Par_3               | -0.014755  | 0.80977  | -0.065073  | 0.66701   |
| 7Networks_RH_Cont_Temp_1              | 0.029293   | 0.65215  | -0.013151  | 0.91389   |
| 7Networks_RH_Cont_PFCv_1              | -0.043185  | 0.49524  | 0.019203   | 0.87688   |
| 7Networks_RH_Cont_PFCI_1              | -0.010404  | 0.86738  | -0.015973  | 0.88071   |
| 7Networks_RH_Cont_PFCI_2              | -0.025513  | 0.68598  | -0.11958   | 0.23628   |
| 7Networks_RH_Cont_PFCI_3              | 0.0057649  | 0.92596  | -0.14242   | 0.13926   |
| 7Networks_RH_Cont_PFCI_4              | -0.099027  | 0.13556  | 0.080294   | 0.35062   |
| 7Networks_RH_Cont_PFCI_5              | -0.052868  | 0.39574  | -0.15745   | 0.10193   |



|                             |            |          |           |               |
|-----------------------------|------------|----------|-----------|---------------|
| 7Networks_RH_Cont_PFCI_6    | -0.0054907 | 0.92893  | -0.16166  | 0.098969      |
| 7Networks_RH_Cont_PFCI_7    | 0.010729   | 0.87195  | 0.0042544 | 0.96512       |
| 7Networks_RH_Cont_pCun_1    | 0.038379   | 0.53765  | 0.014394  | 0.89477       |
| 7Networks_RH_Cont_PFCmp_1   | -0.10307   | 0.11252  | 0.048371  | 0.55242       |
| 7Networks_RH_Cont_PFCmp_2   | -0.052259  | 0.43139  | 0.11205   | 0.2053        |
| 7Networks_RH_Cont_PFCmp_3   | 0.028641   | 0.65387  | -0.1681   | 0.12154       |
| 7Networks_RH_Cont_PFCmp_4   | 0.085144   | 0.21313  | -0.11733  | 0.17645       |
| 7Networks_RH_Default_Par_1  | 0.033991   | 0.59721  | 0.022103  | 0.85441       |
| 7Networks_RH_Default_Par_2  | -0.023787  | 0.70465  | 0.12054   | 0.33341       |
| 7Networks_RH_Default_Par_3  | 0.06102    | 0.33099  | -0.10825  | 0.38287       |
| 7Networks_RH_Default_Temp_1 | -0.065993  | 0.30308  | 0.19809   | 0.043939      |
| 7Networks_RH_Default_Temp_2 | -0.067774  | 0.29184  | 0.11654   | 0.24423       |
| 7Networks_RH_Default_Temp_3 | -0.075433  | 0.27279  | 0.072447  | 0.4165        |
| 7Networks_RH_Default_Temp_4 | -0.01913   | 0.76009  | 0.02613   | 0.79735       |
| 7Networks_RH_Default_Temp_5 | 0.0039176  | 0.9521   | 0.24243   | 0.034091      |
| 7Networks_RH_Default_PFCv_1 | -0.043205  | 0.51109  | 0.13676   | 0.14697       |
| 7Networks_RH_Default_PFCm_1 | -0.086902  | 0.16127  | 0.067947  | 0.50731       |
| 7Networks_RH_Default_PFCm_2 | 0.0024132  | 0.96919  | -0.041556 | 0.70862       |
| 7Networks_RH_Default_PFCm_3 | 0.03672    | 0.59045  | 0.080296  | 0.42046       |
| 7Networks_RH_Default_PFCm_4 | -0.0015703 | 0.98174  | -0.14564  | 0.055887      |
| 7Networks_RH_Default_PFCm_5 | 0.13419    | 0.040708 | -0.23767  | 0.002865<br>7 |
| 7Networks_RH_Default_PFCm_6 | 0.086476   | 0.17274  | -0.25749  | 0.008636<br>2 |
| 7Networks_RH_Default_PFCm_7 | 0.03059    | 0.61364  | -0.16213  | 0.211         |
| 7Networks_RH_Default_PCC_1  | 0.0012425  | 0.98533  | 0.18947   | 0.045664      |
| 7Networks_RH_Default_PCC_2  | 0.076534   | 0.25585  | 0.056522  | 0.53083       |
| 7Networks_RH_Default_PCC_3  | 0.0075094  | 0.90336  | -0.068331 | 0.54846       |

**Supplementary Table 11. Genetic correlation between Openness and cortical thickness.** Genetic correlation between Openness and local cortical thickness calculated using solar 8.4.0. Regions are named according to the Schaefer 200 atlas, based on 7-networks. Here we report environmental correlation ( $\rho_e$ ) and genetic correlation ( $\rho_g$ ) and the associated p-values.



|                                           | $\rho_e$     | P           | $\rho_g$     | P            | $\rho_{ph}$ genetic | $\rho_{ph}$ environment |
|-------------------------------------------|--------------|-------------|--------------|--------------|---------------------|-------------------------|
| <b>Agreeableness</b>                      |              |             |              |              |                     |                         |
| <i>7Networks_LH_Cont_PFC1_4</i>           | <b>-0.12</b> | <b>0.04</b> | <b>-0.08</b> | <b>0.61</b>  | <b>-0.02(0.20)</b>  | <b>-0.09(0.80)</b>      |
| <i>7Networks_LH_Default_PFC_7</i>         | -0.01        | 0.84        | -0.22        | 0.06         | -0.09(0.92)         | -0.01(0.09)             |
| <i>7Networks_LH_Default_PFC_9</i>         | -0.05        | 0.44        | -0.21        | 0.08         | -0.08(0.72)         | -0.02(0.28)             |
| <i>7Networks_LH_Default_PFC_11</i>        | <b>0.01</b>  | <b>0.90</b> | <b>-0.36</b> | <b>0.004</b> | <b>-0.13(1.04)</b>  | <b>0.005(-0.04)</b>     |
| <i>7Networks_LH_Default_PFC_12</i>        | -0.04        | 0.53        | -0.17        | 0.17         | -0.06(0.72)         | -0.02(0.28)             |
| <i>7Networks_LH_Default_PFC_13</i>        | <b>-0.02</b> | <b>0.72</b> | <b>-0.26</b> | <b>0.03</b>  | <b>-0.10(0.87)</b>  | <b>-0.01(0.13)</b>      |
| <i>7Networks_RH_Default_PFCm_5</i>        | <b>0.03</b>  | <b>0.64</b> | <b>-0.33</b> | <b>0.005</b> | <b>-0.12(1.17)</b>  | <b>0.02(-0.17)</b>      |
| <b>Neuroticism</b>                        |              |             |              |              |                     |                         |
| <i>7Networks_LH_Vis_14</i>                | -0.08        | 0.22        | -0.18        | 0.12         | -0.07(0.60)         | -0.05(0.39)             |
| <i>7Networks_LH_DorsAttn_FEF_2</i>        | <b>-0.03</b> | <b>0.69</b> | <b>0.27</b>  | <b>0.03</b>  | <b>0.10(1.20)</b>   | <b>-0.02(-0.20)</b>     |
| <i>7Networks_LH_SalVentAttn_ParOper_2</i> | 0.10         | 0.10        | 0.06         | 0.65         | 0.02(0.23)          | 0.07(0.77)              |
| <i>7Networks_LH_Default_Temp_6</i>        | -0.09        | 0.12        | -0.10        | 0.49         | -0.03(0.33)         | -0.06(0.67)             |
| <i>7Networks_LH_Default_PFC_9</i>         | 0.08         | 0.23        | 0.17         | 0.13         | 0.07(0.61)          | 0.04(0.40)              |
| <i>7Networks_LH_Default_PFC_11</i>        | 0.01         | 0.84        | 0.19         | 0.09         | 0.08(0.91)          | 0.01(0.09)              |
| <i>7Networks_RH_Cont_PFC1_6</i>           | <b>0.03</b>  | <b>0.63</b> | <b>0.26</b>  | <b>0.04</b>  | <b>0.09(0.82)</b>   | <b>0.02(0.18)</b>       |
| <i>7Networks_RH_Default_PFCm_5</i>        | <b>0.04</b>  | <b>0.54</b> | <b>0.21</b>  | <b>0.05</b>  | <b>0.09(0.79)</b>   | <b>0.02(0.21)</b>       |
| <b>Openness</b>                           |              |             |              |              |                     |                         |
| <i>7Networks_LH_Vis_1</i>                 | <b>-0.05</b> | <b>0.46</b> | <b>0.25</b>  | <b>0.005</b> | <b>0.12(1.25)</b>   | <b>-0.02(-0.25)</b>     |
| <i>7Networks_LH_SalVentAttn_PFC1_1</i>    | <b>-0.01</b> | <b>0.83</b> | <b>-0.20</b> | <b>0.02</b>  | <b>-0.10(0.94)</b>  | <b>-0.01(0.06)</b>      |
| <i>7Networks_LH_Cont_PFC1_3</i>           | <b>-0.03</b> | <b>0.69</b> | <b>-0.18</b> | <b>0.05</b>  | <b>-0.08(0.87)</b>  | <b>-0.01(0.13)</b>      |
| <i>7Networks_LH_Cont_PFC1_4</i>           | <b>-0.13</b> | <b>0.05</b> | <b>-0.15</b> | <b>0.17</b>  | <b>-0.06(0.46)</b>  | <b>-0.07(0.54)</b>      |
| <i>7Networks_RH_Limbic_TempPole_1</i>     | <b>-0.01</b> | <b>0.94</b> | <b>0.37</b>  | <b>0.005</b> | <b>0.12(1.02)</b>   | <b>-0.00(-0.02)</b>     |
| <i>7Networks_RH_Cont_PFC1_5</i>           | -0.05        | 0.40        | -0.16        | 0.10         | -0.07(0.71)         | -0.03(0.29)             |
| <i>7Networks_RH_Default_PCC_1</i>         | <b>0.00</b>  | <b>0.99</b> | <b>0.19</b>  | <b>0.05</b>  | <b>0.09(0.99)</b>   | <b>0.00(0.01)</b>       |

**Supplementary Table 12. Phenotypic correlations in the complete HCP sample are partly driven by genetic effects.** Using the regions that showed significant phenotypic correlation in the HCP sample (Figure 1), we explored the genetic and environmental contributions to the phenotypic relationship observed between local cortical thickness and the respective personality trait. Nomenclature of the regions is based on the parcel names of the Schaefer 200 – 7 networks parcel solution. Regions in **red bold** showed genetic correlations at  $p \leq 0.05$  and regions in blue bold show environmental correlations at  $p \leq 0.05$ .

|                                       | $\rho_{phg}$ | $\rho_{phe}$  | $\rho_{ph}$ (Spearman's $\rho$ ) |
|---------------------------------------|--------------|---------------|----------------------------------|
| <u>Agreeableness:</u>                 |              |               |                                  |
| <i>7Networks_LH_Default_Temp_5</i>    | 0.15 (4.85)  | -0.11 (-3.75) | 0.03 (0.03)                      |
| <i>7Networks_RH_SalVentAttn_Med_3</i> | -0.17 (4.09) | 0.13 (-2.95)  | -0.04 (-0.05)                    |
| <i>7Networks_RH_Default_PFCm_6</i>    | -0.15 (6.49) | 0.15 (-6.32)  | -0.02 (-0.00)                    |
| <u>Extraversion:</u>                  |              |               |                                  |
| <i>7Networks_LH_Default_Temp_9</i>    | 0.17 (1.74)  | -0.07 (-0.75) | 0.10 (0.10)                      |

**Supplementary Table 13. Proportional contribution of genetic and environmental factors to phenotypic correlation.** rph-a, the proportion of phenotypic correlations explained by overlapping genetic factors; rph-e, the proportion of phenotypic correlations explained by overlapping non-shared environmental factors.

|                                | HCP all | GSP   | eNKI  |
|--------------------------------|---------|-------|-------|
| <u>Agreeableness:</u>          |         |       |       |
| 7Networks_LH_Default_Temp_5    | 0.03    | -0.04 | -0.03 |
| 7Networks_RH_SalVentAttn_Med_3 | -0.04   | -0.01 | -0.01 |
| 7Networks_RH_Default_PFCm_6    | -0.02   | 0.02  | -0.03 |
| <u>Extraversion:</u>           |         |       |       |
| 7Networks_LH_Default_Temp_9    | 0.10 *  | 0.02  | 0.02  |

**Supplementary Table 14. No robust phenotypic association between personality and cortical thickness in regions that showed significant genetic correlation between personality trait and cortical thickness.** Using the regions that showed significant genetic correlation, we explored whether these regions also had a phenotypic relationship with the respective personality trait in all samples. \*\* indicates FDR corrected at  $p < 0.05$ , whereas \* indicates  $p < 0.05$ .

| Personality trait | $\rho_{phg}/\rho_{phe}$ vs $\rho_{ph}$ | $\rho_{phg}$ vs $\rho_{ph}$ | $\rho_{phe}$ vs $\rho_{ph}$ |
|-------------------|----------------------------------------|-----------------------------|-----------------------------|
| Agreeableness     | 0.20, $p < 0.004$                      | 0.60, $p < 0.001$           | 0.21, $p < 0.005$           |
| Conscientiousness | 0.18, $p < 0.01$                       | 0.53, $p < 0.001$           | 0.20, $p < 0.005$           |
| Extraversion      | 0.06, $p > 0.1$                        | 0.48, $p < 0.001$           | 0.22, $p < 0.005$           |
| Neuroticism       | 0.14, $p < 0.05$                       | 0.60, $p < 0.001$           | 0.31, $p < 0.001$           |
| Openness          | 0.31, $p < 0.001$                      | 0.71, $p < 0.001$           | 0.13, $p = 0.07$            |

**Supplementary Table 15. Whole-brain correlation between genetic / environmental components of phenotypic correlations and phenotypic correlations in HCP.** Spearman's  $\rho$  of the whole brain correlation between phenotypic correlation  $\rho_{ph}$  and genetic ( $\rho_{phg}$ ) / environmental ( $\rho_{phe}$ ) contributions to  $\rho_{ph}$  (phenotypic) for each personality trait-brain structure association in HCP.

|                                | HCP all | GSP   | eNKI  |
|--------------------------------|---------|-------|-------|
| <u>Agreeableness:</u>          |         |       |       |
| 7Networks_LH_Default_Temp_5    | 0.03    | -0.04 | -0.03 |
| 7Networks_RH_SalVentAttn_Med_3 | -0.04   | -0.01 | -0.01 |
| 7Networks_RH_Default_PFCm_6    | -0.02   | 0.02  | -0.03 |
| <u>Extraversion:</u>           |         |       |       |
| 7Networks_LH_Default_Temp_9    | 0.10 *  | 0.02  | 0.02  |

**Supplementary Table 16. No robust phenotypic association between personality and cortical thickness in regions that showed significant genetic correlation between personality trait and cortical thickness.** Using the regions that showed significant genetic correlation, we explored whether these regions also had a phenotypic relationship with the respective personality trait in all samples. \*\* indicates  $FDRq < 0.05$ , whereas \* indicates  $p < 0.05$ .

| Personality trait | $\rho_{ph}$ HCP vs $\rho_{ph}$ GSP | $\rho_{phg}$ HCP vs $\rho_{ph}$ GSP | $\rho_{phe}$ HCP vs $\rho_{ph}$ GSP |
|-------------------|------------------------------------|-------------------------------------|-------------------------------------|
| Agreeableness     | 0.06, $p > 0.4$                    | -0.04, $p > 0.6$                    | 0.13, $p = 0.07$                    |
| Conscientiousness | 0.09, $p > 0.2$                    | 0.04, $p > 0.5$                     | -0.00, $p > 0.9$                    |
| Extraversion      | 0.04, $p > 0.5$                    | 0.09, $p > 0.1$                     | -0.11, $p > 0.1$                    |
| Neuroticism       | -0.08, $p > 0.2$                   | -0.06, $p > 0.3$                    | 0.05, $p > 0.5$                     |

|                 |                 |                |              |
|-----------------|-----------------|----------------|--------------|
| <i>Openness</i> | 0.21, p<0.005** | 0.19, p<0.01** | -0.08, p>0.2 |
|-----------------|-----------------|----------------|--------------|

**Supplementary Table 17. Whole-brain correlation between genetic / environmental components of phenotypic correlations in HCP and phenotypic correlations in GSP.**

Spearman's  $\rho$  of phenotypic correlation  $\rho_{ph}$ , as well as genetic ( $\rho_{phg}$ ) / environmental ( $\rho_{phe}$ ) contributions to  $\rho_{ph}$  (phenotypic) for each personality trait-brain structure association in HCP relative to the phenotypic correlation between personality trait and cortical thickness in GSP.

| Personality trait        | $\rho_{ph}$ HCP vs $\rho_{ph}$ eNKI | $\rho_{phg}$ HCP vs $\rho_{ph}$ eNKI | $\rho_{phe}$ HCP vs $\rho_{ph}$ eNKI |
|--------------------------|-------------------------------------|--------------------------------------|--------------------------------------|
| <i>Agreeableness</i>     | -0.28, p<0.001**                    | -0.04, p>0.6                         | -0.05, p>0.4                         |
| <i>Conscientiousness</i> | 0.16, p<0.05*                       | 0.04, p>0.5                          | 0.13, p=0.07                         |
| <i>Extraversion</i>      | 0.22, p<0.005**                     | 0.09, p>0.1                          | 0.05, p>0.4                          |
| <i>Neuroticism</i>       | -0.04, p>0.5                        | -0.06, p>0.3                         | 0.03, p>0.6                          |
| <i>Openness</i>          | 0.43, p<0.001**                     | 0.35, p<0.001**                      | 0.08, p>0.2                          |

**Supplementary Table 18. Whole-brain correlation between genetic / environmental components of phenotypic correlations in HCP and phenotypic correlations in eNKI.**

Spearman's  $\rho$  of phenotypic correlation  $\rho_{ph}$ , as well as genetic ( $\rho_{phg}$ ) / environmental ( $\rho_{phe}$ ) contributions to  $\rho_{ph}$  (phenotypic) for each personality trait-brain structure association in HCP relative to the phenotypic correlation between personality trait and cortical thickness in eNKI.

| Personality trait        | A              | C              | E             | N           | O |
|--------------------------|----------------|----------------|---------------|-------------|---|
| <i>Agreeableness</i>     | 1              |                |               |             |   |
| <i>Conscientiousness</i> | 0.04 (0.13)    |                |               |             |   |
| <i>Extraversion</i>      | 0.38 (0.12) ** | 0.33(0.09) **  |               |             |   |
| <i>Neuroticism</i>       | -0.14 (0.14)   | -0.27(0.10) *  | -0.31(0.10) * |             |   |
| <i>Openness</i>          | 0.17 (0.11)    | -0.24 (0.09) * | 0.05(0.09)    | -0.01(0.10) |   |

**Supplementary Table 19. Genetic correlation of personality traits.** Genetic correlation across personality traits using solar 8.4.0. \*\* indicates FDRq<0.05 corrected at p<0.05, controlled for number of analysis (10), whereas \* indicates p<0.05.

| Personality trait        | A              | C              | E              | N          | O |
|--------------------------|----------------|----------------|----------------|------------|---|
| <i>Agreeableness</i>     | 1              |                |                |            |   |
| <i>Conscientiousness</i> | 0.32 (0.06) ** |                |                |            |   |
| <i>Extraversion</i>      | 0.26 (0.06) ** | 0.24(0.06) **  |                |            |   |
| <i>Neuroticism</i>       | -0.41(0.06) ** | -0.51(0.05) ** | -0.39(0.06) ** |            |   |
| <i>Openness</i>          | 0.06 (0.06)    | 0.01 (0.07)    | 0.14(0.07) *   | 0.02(0.07) |   |

**Supplementary Table 20. Environmental correlation of personality traits.** Environmental correlation across personality traits using solar 8.4.0. \*\* indicates FDRq<0.05 corrected at p<0.05, controlled for number of analysis (10), whereas \* indicates p<0.05.

|                                           | <b>HCP</b> |        | <b>GSP</b> |      | <b>eNKI</b> |      |
|-------------------------------------------|------------|--------|------------|------|-------------|------|
|                                           | $\rho$     | p      | $\rho$     | p    | $\rho$      | p    |
| <b>Agreeableness</b>                      |            |        |            |      |             |      |
| <i>7Networks_LH_Cont_PFC1_4</i>           | -0.1       | 0.001  | 0.03       | 0.37 | -0.02       | 0.60 |
| <i>7Networks_LH_Default_PFC_7</i>         | -0.1       | 0.001  | 0.02       | 0.49 | 0.02        | 0.65 |
| <i>7Networks_LH_Default_PFC_9</i>         | -0.11      | 0.0003 | 0.00       | 0.99 | 0.06        | 0.12 |
| <i>7Networks_LH_Default_PFC_11</i>        | -0.11      | 0.0003 | -0.01      | 0.74 | -0.02       | 0.49 |
| <i>7Networks_LH_Default_PFC_13</i>        | -0.10      | 0.001  | -0.01      | 0.67 | -0.01       | 0.77 |
| <b>Neuroticism</b>                        |            |        |            |      |             |      |
| <i>7Networks_LH_Vis_14'</i>               | -0.11      | 0.0001 | 0.05       | 0.16 | -0.01       | 0.84 |
| <i>7Networks_LH_SalVentAttn_ParOper_2</i> | 0.11       | 0.0001 | -0.02      | 0.51 | 0.01        | 0.87 |
| <i>7Networks_LH_Default_Temp_6</i>        | -0.10      | 0.0001 | 0.06       | 0.07 | -0.01       | 0.73 |
| <i>7Networks_LH_Default_PFC_9</i>         | 0.10       | 0.0001 | 0.01       | 0.85 | -0.01       | 0.70 |

**Supplementary Table 21. Post-hoc analysis of phenotypic correlations controlling for IQ in GSP and eNKI.** Post-hoc analysis of associations between personality traits and local brain structure correcting in regions that survived  $FDRq < 0.05$  in the HCP sample in the GSP and eNKI samples.
